# Supplementary material for: Structural Analysis of Hypothetical Proteins from Helicobacter pylori: An Approach to Estimate Functions of Unknown or Hypothetical Proteins
Source: Int J Mol Sci. 2012 Jun 8;13(6):7109–37. doi: 10.3390/ijms13067109 (PMC3397514; doi:10.3390/ijms13067109)
Supplement: Supplementary file 1 [file ijms-13-07109-s001.pdf]

# Structural Analysis of Hypothetical Proteins from *Helicobacter pylori*: An Approach to Estimate Functions of Unknown or Hypothetical Proteins

## Supplementary Information

**Table S1.** The protein structures from *H. pylori* determined up to date.

| PDB ID      | Chain ID | AA  | Structure MW | Chain MW | Ligand MW | Macromolecule Name                                                     | Classification     | Ligand Name                                                  | Ligand ID | Macromol. Type | Exp. Method | Rel. Date  | Center Name       |
|-------------|----------|-----|--------------|----------|-----------|------------------------------------------------------------------------|--------------------|--------------------------------------------------------------|-----------|----------------|-------------|------------|-------------------|
| <b>1E9Y</b> | A        | 238 | 88526.37     | 26571.90 |           | Urease subunit alpha                                                   | Hydrolase          |                                                              |           | Protein        | X-ray       | 2001-11-01 |                   |
|             | B        | 569 | 88526.37     | 61762.00 | 75.07     | Urease subunit beta                                                    | Hydrolase          | Acetohydroxamic acid                                         | HAE       | Protein        | X-ray       | 2001-11-01 |                   |
|             | B        | 569 | 88526.37     | 61762.00 | 190.20    | Urease subunit beta                                                    | Hydrolase          | Lysine nz-carboxylic acid                                    | KCX       | Protein        | X-ray       | 2001-11-01 |                   |
|             | B        | 569 | 88526.37     | 61762.00 | 58.70     | Urease subunit beta                                                    | Hydrolase          | Nickel (ii) ion                                              | NI        | Protein        | X-ray       | 2001-11-01 |                   |
| <b>1E9Z</b> | A        | 238 | 88435.30     | 26571.90 |           | Urease subunit alpha                                                   | Hydrolase          |                                                              |           | Protein        | X-ray       | 2001-11-01 |                   |
|             | B        | 569 | 88435.30     | 61746.00 | 190.20    | Urease subunit beta                                                    | Hydrolase          | Lysine nz-carboxylic acid                                    | KCX       | Protein        | X-ray       | 2001-11-01 |                   |
|             | B        | 569 | 88435.30     | 61746.00 | 58.70     | Urease subunit beta                                                    | Hydrolase          | Nickel (ii) ion                                              | NI        | Protein        | X-ray       | 2001-11-01 |                   |
| <b>1FUE</b> | A        | 163 | 17761.55     | 17305.20 | 456.35    | Flavodoxin                                                             | Electron transport | Flavin mononucleotide                                        | FMN       | Protein        | X-ray       | 2002-02-06 |                   |
| <b>1G6O</b> | A        | 330 | 77214.21     | 37914.60 | 427.20    | Cag-alpha                                                              | Hydrolase          | Adenosine-5'-diphosphate                                     | ADP       | Protein        | X-ray       | 2001-01-24 | MCSG <sup>a</sup> |
|             | A        | 330 | 77214.21     | 37914.60 | 196.11    | Cag-alpha                                                              | Hydrolase          | Selenomethionine                                             | MSE       | Protein        | X-ray       | 2001-01-24 | MCSG              |
|             | B        | 330 | 77214.21     | 37914.60 | 427.20    | Cag-alpha                                                              | Hydrolase          | Adenosine-5'-diphosphate                                     | ADP       | Protein        | X-ray       | 2001-01-24 | MCSG              |
|             | B        | 330 | 77214.21     | 37914.60 | 196.11    | Cag-alpha                                                              | Hydrolase          | Selenomethionine                                             | MSE       | Protein        | X-ray       | 2001-01-24 | MCSG              |
|             | B        | 330 | 77214.21     | 37914.60 | 106.12    | Cag-alpha                                                              | Hydrolase          | Di(hydroxyethyl)ether                                        | PEG       | Protein        | X-ray       | 2001-01-24 | MCSG              |
| <b>1J2Y</b> | A        | 167 | 18689.55     | 18499.40 | 190.15    | 3-dehydroquinate dehydratase                                           | Lyase              | 1,3,4-trihydroxy-5-oxo-cyclohexanecarboxylic acid            | DQA       | Protein        | X-ray       | 2003-06-24 |                   |
| <b>1J2Z</b> | A        | 270 | 30547.34     | 29896.70 | 96.06     | Acyl-[acyl-carrier-protein]--UDP-N-acetylglucosamine O-acyltransferase | Transferase        | Sulfate ion                                                  | SO4       | Protein        | X-ray       | 2004-01-27 |                   |
|             | A        | 270 | 30547.34     | 29896.70 | 308.43    | Acyl-[acyl-carrier-protein]--UDP-N-acetylglucosamine O-acyltransferase | Transferase        | 2-hydroxymethyl-6-octylsulfanyl-tetrahydro-pyran-3,4,5-triol | SOG       | Protein        | X-ray       | 2004-01-27 |                   |
|             | A        | 270 | 30547.34     | 29896.70 | 150.09    | Acyl-[acyl-carrier-protein]--UDP-N-acetylglucosamine O-acyltransferase | Transferase        | L(+)-tartaric acid                                           | TLA       | Protein        | X-ray       | 2004-01-27 |                   |
| <b>1J6X</b> | A        | 160 | 37837.97     | 18704.40 | 196.11    | Autoinducer-2protein luxs                                              | Signaling protein  | Selenomethionine                                             | MSE       | Protein        | X-ray       | 2001-06-08 |                   |
|             | A        | 160 | 37837.97     | 18704.40 | 65.38     | Autoinducer-2protein luxs                                              | Signaling protein  | Zinc ion                                                     | ZN        | Protein        | X-ray       | 2001-06-08 |                   |

|      |   |     |           |          |        |                                 |                   |                               |     |         |       |            |
|------|---|-----|-----------|----------|--------|---------------------------------|-------------------|-------------------------------|-----|---------|-------|------------|
| 1J14 | B | 160 | 37837.97  | 18704.40 | 196.11 | Autoinducer-2protein luxs       | Signaling protein | Selenomethionine              | MSE | Protein | X-ray | 2001-06-08 |
|      | B | 160 | 37837.97  | 18704.40 | 65.38  | Autoinducer-2protein luxs       | Signaling protein | Zinc ion                      | ZN  | Protein | X-ray | 2001-06-08 |
|      | A | 144 | 205615.45 | 16960.60 | 55.85  | Neutrophil-activating protein a | Metal transport   | Fe (iii) ion                  | FE  | Protein | X-ray | 2002-10-09 |
|      | A | 144 | 205615.45 | 16960.60 | 118.18 | Neutrophil-activating protein a | Metal transport   | (4s)-2-methyl-2,4-pentanediol | MPD | Protein | X-ray | 2002-10-09 |
|      | A | 144 | 205615.45 | 16960.60 |        | Neutrophil-activating protein a | Metal transport   | Unknown atom or ion           | UNX | Protein | X-ray | 2002-10-09 |
|      | B | 144 | 205615.45 | 16960.60 | 55.85  | Neutrophil-activating protein a | Metal transport   | Fe (iii) ion                  | FE  | Protein | X-ray | 2002-10-09 |
|      | B | 144 | 205615.45 | 16960.60 | 118.18 | Neutrophil-activating protein a | Metal transport   | (4s)-2-methyl-2,4-pentanediol | MPD | Protein | X-ray | 2002-10-09 |
|      | B | 144 | 205615.45 | 16960.60 |        | Neutrophil-activating protein a | Metal transport   | Unknown atom or ion           | UNX | Protein | X-ray | 2002-10-09 |
|      | C | 144 | 205615.45 | 16960.60 | 55.85  | Neutrophil-activating protein a | Metal transport   | Fe (iii) ion                  | FE  | Protein | X-ray | 2002-10-09 |
|      | C | 144 | 205615.45 | 16960.60 | 118.18 | Neutrophil-activating protein a | Metal transport   | (4s)-2-methyl-2,4-pentanediol | MPD | Protein | X-ray | 2002-10-09 |
|      | C | 144 | 205615.45 | 16960.60 |        | Neutrophil-activating protein a | Metal transport   | Unknown atom or ion           | UNX | Protein | X-ray | 2002-10-09 |
|      | D | 144 | 205615.45 | 16960.60 | 55.85  | Neutrophil-activating protein a | Metal transport   | Fe (iii) ion                  | FE  | Protein | X-ray | 2002-10-09 |
|      | D | 144 | 205615.45 | 16960.60 | 118.18 | Neutrophil-activating protein a | Metal transport   | (4s)-2-methyl-2,4-pentanediol | MPD | Protein | X-ray | 2002-10-09 |
|      | D | 144 | 205615.45 | 16960.60 |        | Neutrophil-activating protein a | Metal transport   | Unknown atom or ion           | UNX | Protein | X-ray | 2002-10-09 |
|      | E | 144 | 205615.45 | 16960.60 | 55.85  | Neutrophil-activating protein a | Metal transport   | Fe (iii) ion                  | FE  | Protein | X-ray | 2002-10-09 |
|      | E | 144 | 205615.45 | 16960.60 | 118.18 | Neutrophil-activating protein a | Metal transport   | (4s)-2-methyl-2,4-pentanediol | MPD | Protein | X-ray | 2002-10-09 |
|      | E | 144 | 205615.45 | 16960.60 |        | Neutrophil-activating protein a | Metal transport   | Unknown atom or ion           | UNX | Protein | X-ray | 2002-10-09 |
|      | F | 144 | 205615.45 | 16960.60 | 55.85  | Neutrophil-activating protein a | Metal transport   | Fe (iii) ion                  | FE  | Protein | X-ray | 2002-10-09 |
|      | F | 144 | 205615.45 | 16960.60 | 118.18 | Neutrophil-activating protein a | Metal transport   | (4s)-2-methyl-2,4-pentanediol | MPD | Protein | X-ray | 2002-10-09 |
|      | F | 144 | 205615.45 | 16960.60 |        | Neutrophil-activating protein a | Metal transport   | Unknown atom or ion           | UNX | Protein | X-ray | 2002-10-09 |
|      | G | 144 | 205615.45 | 16960.60 | 55.85  | Neutrophil-activating protein a | Metal transport   | Fe (iii) ion                  | FE  | Protein | X-ray | 2002-10-09 |
|      | G | 144 | 205615.45 | 16960.60 | 118.18 | Neutrophil-activating protein a | Metal transport   | (4s)-2-methyl-2,4-pentanediol | MPD | Protein | X-ray | 2002-10-09 |
|      | G | 144 | 205615.45 | 16960.60 |        | Neutrophil-activating protein a | Metal transport   | Unknown atom or ion           | UNX | Protein | X-ray | 2002-10-09 |
|      | H | 144 | 205615.45 | 16960.60 | 55.85  | Neutrophil-activating protein a | Metal transport   | Fe (iii) ion                  | FE  | Protein | X-ray | 2002-10-09 |
|      | H | 144 | 205615.45 | 16960.60 | 118.18 | Neutrophil-activating protein a | Metal transport   | (4s)-2-methyl-2,4-pentanediol | MPD | Protein | X-ray | 2002-10-09 |
|      | H | 144 | 205615.45 | 16960.60 |        | Neutrophil-activating protein a | Metal transport   | Unknown atom or ion           | UNX | Protein | X-ray | 2002-10-09 |
|      | I | 144 | 205615.45 | 16960.60 | 55.85  | Neutrophil-activating protein a | Metal transport   | Fe (iii) ion                  | FE  | Protein | X-ray | 2002-10-09 |
|      | I | 144 | 205615.45 | 16960.60 | 118.18 | Neutrophil-activating protein a | Metal transport   | (4s)-2-methyl-2,4-pentanediol | MPD | Protein | X-ray | 2002-10-09 |
|      | I | 144 | 205615.45 | 16960.60 |        | Neutrophil-activating protein a | Metal transport   | Unknown atom or ion           | UNX | Protein | X-ray | 2002-10-09 |
|      | J | 144 | 205615.45 | 16960.60 | 55.85  | Neutrophil-activating protein a | Metal transport   | Fe (iii) ion                  | FE  | Protein | X-ray | 2002-10-09 |
|      | J | 144 | 205615.45 | 16960.60 | 118.18 | Neutrophil-activating protein a | Metal transport   | (4s)-2-methyl-2,4-pentanediol | MPD | Protein | X-ray | 2002-10-09 |

|             |   |     |           |          |        |                                 |                                    |                                            |     |         |       |            |                   |
|-------------|---|-----|-----------|----------|--------|---------------------------------|------------------------------------|--------------------------------------------|-----|---------|-------|------------|-------------------|
|             | J | 144 | 205615.45 | 16960.60 |        | Neutrophil-activating protein a | Metal transport                    | Unknown atom or ion                        | UNX | Protein | X-ray | 2002-10-09 |                   |
|             | K | 144 | 205615.45 | 16960.60 | 55.85  | Neutrophil-activating protein a | Metal transport                    | Fe (iii) ion                               | FE  | Protein | X-ray | 2002-10-09 |                   |
|             | K | 144 | 205615.45 | 16960.60 | 118.18 | Neutrophil-activating protein a | Metal transport                    | (4s)-2-methyl-2,4-pentanediol              | MPD | Protein | X-ray | 2002-10-09 |                   |
|             | K | 144 | 205615.45 | 16960.60 |        | Neutrophil-activating protein a | Metal transport                    | Unknown atom or ion                        | UNX | Protein | X-ray | 2002-10-09 |                   |
|             | L | 144 | 205615.45 | 16960.60 | 55.85  | Neutrophil-activating protein a | Metal transport                    | Fe (iii) ion                               | FE  | Protein | X-ray | 2002-10-09 |                   |
|             | L | 144 | 205615.45 | 16960.60 | 118.18 | Neutrophil-activating protein a | Metal transport                    | (4s)-2-methyl-2,4-pentanediol              | MPD | Protein | X-ray | 2002-10-09 |                   |
|             | L | 144 | 205615.45 | 16960.60 |        | Neutrophil-activating protein a | Metal transport                    | Unknown atom or ion                        | UNX | Protein | X-ray | 2002-10-09 |                   |
| <b>1KLX</b> | A | 138 | 15367.80  | 15367.80 |        | Cysteineprotein B               | Hydrolase                          |                                            |     | Protein | X-ray | 2002-09-11 |                   |
| <b>1MW7</b> | A | 240 | 27161.20  | 27161.20 |        | Hypothetical protein hp0162     | SG <sup>b</sup> , unknown function |                                            |     | Protein | X-ray | 2003-01-28 | NSGC <sup>c</sup> |
| <b>1NLY</b> | A | 330 | 77410.55  | 37914.60 | 523.24 | Virb11 homolog                  | Hydrolase                          | Phosphothiophosphoric acid-adenylate ester | ATG | Protein | X-ray | 2003-05-06 |                   |
|             | A | 330 | 77410.55  | 37914.60 | 24.31  | Virb11 homolog                  | Hydrolase                          | Magnesium ion                              | MG  | Protein | X-ray | 2003-05-06 |                   |
|             | A | 330 | 77410.55  | 37914.60 | 196.11 | Virb11 homolog                  | Hydrolase                          | Selenomethionine                           | MSE | Protein | X-ray | 2003-05-06 |                   |
|             | B | 330 | 77410.55  | 37914.60 | 414.49 | Virb11 homolog                  | Hydrolase                          | Nonaethylene glycol                        | 2PE | Protein | X-ray | 2003-05-06 |                   |
|             | B | 330 | 77410.55  | 37914.60 | 523.24 | Virb11 homolog                  | Hydrolase                          | Phosphothiophosphoric acid-adenylate ester | ATG | Protein | X-ray | 2003-05-06 |                   |
|             | B | 330 | 77410.55  | 37914.60 | 196.11 | Virb11 homolog                  | Hydrolase                          | Selenomethionine                           | MSE | Protein | X-ray | 2003-05-06 |                   |
|             | B | 330 | 77410.55  | 37914.60 | 96.06  | Virb11 homolog                  | Hydrolase                          | Sulfate ion                                | SO4 | Protein | X-ray | 2003-05-06 |                   |
| <b>1NLZ</b> | A | 330 | 227487.61 | 37914.60 | 196.11 | Virb11 homolog                  | Hydrolase                          | Selenomethionine                           | MSE | Protein | X-ray | 2003-05-06 |                   |
|             | B | 330 | 227487.61 | 37914.60 | 196.11 | Virb11 homolog                  | Hydrolase                          | Selenomethionine                           | MSE | Protein | X-ray | 2003-05-06 |                   |
|             | C | 330 | 227487.61 | 37914.60 | 196.11 | Virb11 homolog                  | Hydrolase                          | Selenomethionine                           | MSE | Protein | X-ray | 2003-05-06 |                   |
|             | D | 330 | 227487.61 | 37914.60 | 196.11 | Virb11 homolog                  | Hydrolase                          | Selenomethionine                           | MSE | Protein | X-ray | 2003-05-06 |                   |
|             | E | 330 | 227487.61 | 37914.60 | 196.11 | Virb11 homolog                  | Hydrolase                          | Selenomethionine                           | MSE | Protein | X-ray | 2003-05-06 |                   |
|             | F | 330 | 227487.61 | 37914.60 | 196.11 | Virb11 homolog                  | Hydrolase                          | Selenomethionine                           | MSE | Protein | X-ray | 2003-05-06 |                   |
| <b>1OPX</b> | A | 330 | 76435.81  | 37914.60 | 196.11 | Virb11 homolog                  | Hydrolase                          | Selenomethionine                           | MSE | Protein | X-ray | 2003-05-06 |                   |
| <b>1OPX</b> | A | 330 | 76435.81  | 37914.60 | 96.06  | Virb11 homolog                  | Hydrolase                          | Sulfate ion                                | SO4 | Protein | X-ray | 2003-05-06 |                   |
|             | B | 330 | 76435.81  | 37914.60 | 414.49 | Virb11 homolog                  | Hydrolase                          | Nonaethylene glycol                        | 2PE | Protein | X-ray | 2003-05-06 |                   |
|             | B | 330 | 76435.81  | 37914.60 | 196.11 | Virb11 homolog                  | Hydrolase                          | Selenomethionine                           | MSE | Protein | X-ray | 2003-05-06 |                   |
|             | B | 330 | 76435.81  | 37914.60 | 96.06  | Virb11 homolog                  | Hydrolase                          | Sulfate ion                                | SO4 | Protein | X-ray | 2003-05-06 |                   |
| <b>1OT0</b> | A | 20  | 2396.99   | 2396.99  | 16.02  | 50sprotein L1                   | Antibiotic                         | Amino group                                | NH2 | Protein | NMR   | 2004-09-07 |                   |
| <b>1OUV</b> | A | 273 | 29972.10  | 29972.10 |        | Conservedprotein                | Hydrolase                          |                                            |     | Protein | X-ray | 2004-03-30 |                   |

|             |   |     |           |          |        |                                       |                  |                                     |     |         |       |            |
|-------------|---|-----|-----------|----------|--------|---------------------------------------|------------------|-------------------------------------|-----|---------|-------|------------|
| <b>1PU6</b> | A | 218 | 50786.53  | 25218.30 | 78.13  | 3-methyladenine dna glycosylase       | Hydrolase        | Beta-mercaptoethanol                | BME | Protein | X-ray | 2003-10-07 |
|             | A | 218 | 50786.53  | 25218.30 | 35.45  | 3-methyladenine dna glycosylase       | Hydrolase        | Chloride ion                        | CL  | Protein | X-ray | 2003-10-07 |
|             | A | 218 | 50786.53  | 25218.30 | 190.20 | 3-methyladenine dna glycosylase       | Hydrolase        | Lysine nz-carboxylic acid           | KCX | Protein | X-ray | 2003-10-07 |
|             | B | 218 | 50786.53  | 25218.30 | 190.20 | 3-methyladenine dna glycosylase       | Hydrolase        | Lysine nz-carboxylic acid           | KCX | Protein | X-ray | 2003-10-07 |
|             | B | 218 | 50786.53  | 25218.30 | 118.18 | 3-methyladenine dna glycosylase       | Hydrolase        | (4s)-2-methyl-2,4-pentanediol       | MPD | Protein | X-ray | 2003-10-07 |
| <b>1PU7</b> | A | 218 | 50921.24  | 25218.30 | 164.19 | 3-methyladenine dna glycosylase       | Hydrolase        | 6-amino-3,9-dimethyl-9h-purin-3-ium | 39A | Protein | X-ray | 2003-10-07 |
|             | A | 218 | 50921.24  | 25218.30 | 78.13  | 3-methyladenine dna glycosylase       | Hydrolase        | Beta-mercaptoethanol                | BME | Protein | X-ray | 2003-10-07 |
|             | A | 218 | 50921.24  | 25218.30 | 190.20 | 3-methyladenine dna glycosylase       | Hydrolase        | Lysine nz-carboxylic acid           | KCX | Protein | X-ray | 2003-10-07 |
|             | B | 218 | 50921.24  | 25218.30 | 164.19 | 3-methyladenine dna glycosylase       | Hydrolase        | 6-amino-3,9-dimethyl-9h-purin-3-ium | 39A | Protein | X-ray | 2003-10-07 |
|             | B | 218 | 50921.24  | 25218.30 | 78.13  | 3-methyladenine dna glycosylase       | Hydrolase        | Beta-mercaptoethanol                | BME | Protein | X-ray | 2003-10-07 |
| <b>1PU8</b> | B | 218 | 50921.24  | 25218.30 | 190.20 | 3-methyladenine dna glycosylase       | Hydrolase        | Lysine nz-carboxylic acid           | KCX | Protein | X-ray | 2003-10-07 |
|             | A | 218 | 50911.16  | 25218.30 | 78.13  | 3-methyladenine dna glycosylase       | Hydrolase        | Beta-mercaptoethanol                | BME | Protein | X-ray | 2003-10-07 |
|             | A | 218 | 50911.16  | 25218.30 | 159.15 | 3-methyladenine dna glycosylase       | Hydrolase        | 3h-imidazo[2,1-i]purine             | EA1 | Protein | X-ray | 2003-10-07 |
|             | A | 218 | 50911.16  | 25218.30 | 190.20 | 3-methyladenine dna glycosylase       | Hydrolase        | Lysine nz-carboxylic acid           | KCX | Protein | X-ray | 2003-10-07 |
|             | B | 218 | 50911.16  | 25218.30 | 78.13  | 3-methyladenine dna glycosylase       | Hydrolase        | Beta-mercaptoethanol                | BME | Protein | X-ray | 2003-10-07 |
| <b>1QWL</b> | B | 218 | 50911.16  | 25218.30 | 159.15 | 3-methyladenine dna glycosylase       | Hydrolase        | 3h-imidazo[2,1-i]purine             | EA1 | Protein | X-ray | 2003-10-07 |
|             | B | 218 | 50911.16  | 25218.30 | 190.20 | 3-methyladenine dna glycosylase       | Hydrolase        | Lysine nz-carboxylic acid           | KCX | Protein | X-ray | 2003-10-07 |
|             | A | 505 | 118768.41 | 58730.70 | 616.50 | Kata catalase                         | Oxidoreductase   | Protoporphyrin ix containing fe     | HEM | Protein | X-ray | 2004-03-30 |
|             | A | 505 | 118768.41 | 58730.70 | 32.00  | Kata catalase                         | Oxidoreductase   | Oxygen molecule                     | OXY | Protein | X-ray | 2004-03-30 |
|             | B | 505 | 118768.41 | 58730.70 | 42.02  | Kata catalase                         | Oxidoreductase   | Azide ion                           | AZI | Protein | X-ray | 2004-03-30 |
| <b>1QWM</b> | B | 505 | 118768.41 | 58730.70 | 616.50 | Kata catalase                         | Oxidoreductase   | Protoporphyrin ix containing fe     | HEM | Protein | X-ray | 2004-03-30 |
|             | A | 505 | 120393.35 | 58730.70 | 42.02  | Kata catalase                         | Oxidoreductase   | Azide ion                           | AZI | Protein | X-ray | 2004-03-30 |
|             | A | 505 | 120393.35 | 58730.70 | 46.03  | Kata catalase                         | Oxidoreductase   | Formic acid                         | FMT | Protein | X-ray | 2004-03-30 |
|             | A | 505 | 120393.35 | 58730.70 | 616.50 | Kata catalase                         | Oxidoreductase   | Protoporphyrin ix containing fe     | HEM | Protein | X-ray | 2004-03-30 |
|             | B | 505 | 120393.35 | 58730.70 | 46.03  | Kata catalase                         | Oxidoreductase   | Formic acid                         | FMT | Protein | X-ray | 2004-03-30 |
| <b>1S2X</b> | B | 505 | 120393.35 | 58730.70 | 616.50 | Kata catalase                         | Oxidoreductase   | Protoporphyrin ix containing fe     | HEM | Protein | X-ray | 2004-03-30 |
|             | A | 206 | 23998.70  | 23938.60 | 60.10  | Cag-Z                                 | Unknown function | Isopropyl alcohol                   | IPA | Protein | X-ray | 2004-07-27 |
| <b>1UHD</b> | A | 206 | 23998.70  | 23938.60 | 196.11 | Cag-Z                                 | Unknown function | Selenomethionine                    | MSE | Protein | X-ray | 2004-07-27 |
|             | A | 96  | 13339.46  | 10533.20 | 90.08  | Aspartate 1-decarboxylase alpha chain | Lyase            | Lactic acid                         | LAC | Protein | X-ray | 2004-07-13 |
| <b>1UHE</b> | B | 24  | 13339.46  | 2806.26  |        | Aspartate 1-decarboxylase beta chain  | Lyase            |                                     |     | Protein | X-ray | 2004-07-13 |
|             | A | 97  | 13744.94  | 10737.50 | 201.18 | Aspartate 1-decarboxylase alpha chain | Lyase            | N~2~-(2-amino-1-methyl-2-           | NSN | Protein | X-ray | 2004-07-13 |

| oxoethylidene)asparaginate |   |     |           |          |                                      |                                                     |                      |                                     |         |         |                       |
|----------------------------|---|-----|-----------|----------|--------------------------------------|-----------------------------------------------------|----------------------|-------------------------------------|---------|---------|-----------------------|
|                            | B | 24  | 13744.94  | 2806.26  | Aspartate 1-decarboxylase beta chain | Lyase                                               |                      |                                     | Protein | X-ray   | 2004-07-13            |
| <b>1UM0</b>                | A | 365 | 162446.59 | 40155.30 | 456.35                               | Chorismate synthase                                 | Lyase                | Flavin mononucleotide               | FMN     | Protein | X-ray 2004-06-01      |
|                            | B | 365 | 162446.59 | 40155.30 | 456.35                               | Chorismate synthase                                 | Lyase                | Flavin mononucleotide               | FMN     | Protein | X-ray 2004-06-01      |
|                            | C | 365 | 162446.59 | 40155.30 | 456.35                               | Chorismate synthase                                 | Lyase                | Flavin mononucleotide               | FMN     | Protein | X-ray 2004-06-01      |
|                            | D | 365 | 162446.59 | 40155.30 | 456.35                               | Chorismate synthase                                 | Lyase                | Flavin mononucleotide               | FMN     | Protein | X-ray 2004-06-01      |
| <b>1UM8</b>                | A | 376 | 42519.20  | 42092.00 | 427.20                               | ATP-dependent Clp protease ATP-binding subunit clpX | Chaperone            | Adenosine-5'-diphosphate            | ADP     | Protein | X-ray 2003-12-23      |
| <b>1UMF</b>                | A | 365 | 160621.20 | 40155.30 |                                      | Chorismate synthase                                 | Lyase                |                                     |         | Protein | X-ray 2004-06-01      |
|                            | B | 365 | 160621.20 | 40155.30 |                                      | Chorismate synthase                                 | Lyase                |                                     |         | Protein | X-ray 2004-06-01      |
|                            | C | 365 | 160621.20 | 40155.30 |                                      | Chorismate synthase                                 | Lyase                |                                     |         | Protein | X-ray 2004-06-01      |
|                            | D | 365 | 160621.20 | 40155.30 |                                      | Chorismate synthase                                 | Lyase                |                                     |         | Protein | X-ray 2004-06-01      |
| <b>1X93</b>                | A | 55  | 13142.92  | 6571.46  |                                      | Hypothetical protein HP0222                         | Transcription        |                                     |         | Protein | NMR 2005-03-22        |
|                            | B | 55  | 13142.92  | 6571.46  |                                      | Hypothetical protein HP0222                         | Transcription        |                                     |         | Protein | NMR 2005-03-22        |
| <b>1XNG</b>                | A | 268 | 63146.42  | 30376.30 | 507.18                               | NH(3)-dependent NAD(+) synthetase                   | Ligase               | Adenosine-5'-triphosphate           | ATP     | Protein | X-ray 2005-04-05      |
|                            | A | 268 | 63146.42  | 30376.30 | 665.42                               | NH(3)-dependent NAD(+) synthetase                   | Ligase               | Nicotinic acid adenine dinucleotide | DND     | Protein | X-ray 2005-04-05      |
|                            | A | 268 | 63146.42  | 30376.30 | 24.31                                | NH(3)-dependent NAD(+) synthetase                   | Ligase               | Magnesium ion                       | MG      | Protein | X-ray 2005-04-05      |
|                            | B | 268 | 63146.42  | 30376.30 | 507.18                               | NH(3)-dependent NAD(+) synthetase                   | Ligase               | Adenosine-5'-triphosphate           | ATP     | Protein | X-ray 2005-04-05      |
|                            | B | 268 | 63146.42  | 30376.30 | 665.42                               | NH(3)-dependent NAD(+) synthetase                   | Ligase               | Nicotinic acid adenine dinucleotide | DND     | Protein | X-ray 2005-04-05      |
|                            | B | 268 | 63146.42  | 30376.30 | 24.31                                | NH(3)-dependent NAD(+) synthetase                   | Ligase               | Magnesium ion                       | MG      | Protein | X-ray 2005-04-05      |
| <b>1XNH</b>                | A | 268 | 30376.30  | 30376.30 |                                      | NH(3)-dependent NAD(+) synthetase                   | Ligase               |                                     |         | Protein | X-ray 2005-04-05      |
| <b>1YG0</b>                | A | 66  | 7203.31   | 7203.31  |                                      | Copprotein                                          | Metal transport      |                                     |         | Protein | NMR 2006-01-24        |
| <b>1YGZ</b>                | A | 173 | 116914.20 | 19485.70 | 196.11                               | Inorganic pyrophosphatase                           | Hydrolase            | Selenomethionine                    | MSE     | Protein | X-ray 2005-11-01      |
|                            | B | 173 | 116914.20 | 19485.70 | 196.11                               | Inorganic pyrophosphatase                           | Hydrolase            | Selenomethionine                    | MSE     | Protein | X-ray 2005-11-01      |
|                            | C | 173 | 116914.20 | 19485.70 | 196.11                               | Inorganic pyrophosphatase                           | Hydrolase            | Selenomethionine                    | MSE     | Protein | X-ray 2005-11-01      |
|                            | D | 173 | 116914.20 | 19485.70 | 196.11                               | Inorganic pyrophosphatase                           | Hydrolase            | Selenomethionine                    | MSE     | Protein | X-ray 2005-11-01      |
|                            | E | 173 | 116914.20 | 19485.70 | 196.11                               | Inorganic pyrophosphatase                           | Hydrolase            | Selenomethionine                    | MSE     | Protein | X-ray 2005-11-01      |
|                            | F | 173 | 116914.20 | 19485.70 | 196.11                               | Inorganic pyrophosphatase                           | Hydrolase            | Selenomethionine                    | MSE     | Protein | X-ray 2005-11-01      |
| <b>1Z8M</b>                | A | 88  | 10394.30  | 10394.30 |                                      | Conservedprotein HP0894                             | SG, Unknown function |                                     |         | Protein | NMR 2005-11-01        |
| <b>1ZHC</b>                | A | 76  | 9130.38   | 9130.38  |                                      | Hypothetical protein HP1242                         | Unknown function     |                                     |         | Protein | NMR 2005-12-06        |
| <b>1ZKE</b>                | A | 83  | 56798.00  | 9450.13  |                                      | Hypothetical protein HP1531                         | SG, unknown function |                                     |         | Protein | X-ray 2005-06-28 MCSG |

|             |   |     |           |          |        |                                                                                     |                      |                                                             |     |         |       |            |      |
|-------------|---|-----|-----------|----------|--------|-------------------------------------------------------------------------------------|----------------------|-------------------------------------------------------------|-----|---------|-------|------------|------|
|             | B | 83  | 56798.00  | 9450.13  | 24.31  | Hypothetical protein HP1531                                                         | SG, unknown function | Magnesium ion                                               | MG  | Protein | X-ray | 2005-06-28 | MCSG |
|             | C | 83  | 56798.00  | 9450.13  | 24.31  | Hypothetical protein HP1531                                                         | SG, unknown function | Magnesium ion                                               | MG  | Protein | X-ray | 2005-06-28 | MCSG |
|             | D | 83  | 56798.00  | 9450.13  | 24.31  | Hypothetical protein HP1531                                                         | SG, unknown function | Magnesium ion                                               | MG  | Protein | X-ray | 2005-06-28 | MCSG |
|             | E | 83  | 56798.00  | 9450.13  | 24.31  | Hypothetical protein HP1531                                                         | SG, unknown function | Magnesium ion                                               | MG  | Protein | X-ray | 2005-06-28 | MCSG |
|             | F | 83  | 56798.00  | 9450.13  |        | Hypothetical protein HP1531                                                         | SG, unknown function |                                                             |     | Protein | X-ray | 2005-06-28 | MCSG |
| <b>1ZOF</b> | A | 198 | 222768.00 | 22276.80 |        | Alkyl hydroperoxide-reductase                                                       | Oxidoreductase       |                                                             |     | Protein | X-ray | 2005-11-29 |      |
|             | B | 198 | 222768.00 | 22276.80 |        | Alkyl hydroperoxide-reductase                                                       | Oxidoreductase       |                                                             |     | Protein | X-ray | 2005-11-29 |      |
|             | C | 198 | 222768.00 | 22276.80 |        | Alkyl hydroperoxide-reductase                                                       | Oxidoreductase       |                                                             |     | Protein | X-ray | 2005-11-29 |      |
|             | D | 198 | 222768.00 | 22276.80 |        | Alkyl hydroperoxide-reductase                                                       | Oxidoreductase       |                                                             |     | Protein | X-ray | 2005-11-29 |      |
|             | E | 198 | 222768.00 | 22276.80 |        | Alkyl hydroperoxide-reductase                                                       | Oxidoreductase       |                                                             |     | Protein | X-ray | 2005-11-29 |      |
|             | F | 198 | 222768.00 | 22276.80 |        | Alkyl hydroperoxide-reductase                                                       | Oxidoreductase       |                                                             |     | Protein | X-ray | 2005-11-29 |      |
|             | G | 198 | 222768.00 | 22276.80 |        | Alkyl hydroperoxide-reductase                                                       | Oxidoreductase       |                                                             |     | Protein | X-ray | 2005-11-29 |      |
|             | H | 198 | 222768.00 | 22276.80 |        | Alkyl hydroperoxide-reductase                                                       | Oxidoreductase       |                                                             |     | Protein | X-ray | 2005-11-29 |      |
|             | I | 198 | 222768.00 | 22276.80 |        | Alkyl hydroperoxide-reductase                                                       | Oxidoreductase       |                                                             |     | Protein | X-ray | 2005-11-29 |      |
|             | J | 198 | 222768.00 | 22276.80 |        | Alkyl hydroperoxide-reductase                                                       | Oxidoreductase       |                                                             |     | Protein | X-ray | 2005-11-29 |      |
| <b>1ZUH</b> | A | 168 | 19265.50  | 19265.50 |        | Shikimate kinase                                                                    | Transferase          |                                                             |     | Protein | X-ray | 2006-05-31 |      |
| <b>1ZUI</b> | A | 168 | 19534.62  | 19265.50 | 94.97  | Shikimate kinase                                                                    | Transferase          | Phosphate ion                                               | PO4 | Protein | X-ray | 2006-05-31 |      |
|             | A | 168 | 19534.62  | 19265.50 | 174.15 | Shikimate kinase                                                                    | Transferase          | (3r,4s,5r)-3,4,5-trihydroxycyclohex-1-ene-1-carboxylic acid | SKM | Protein | X-ray | 2006-05-31 |      |
| <b>2A6M</b> | A | 155 | 36212.60  | 18106.30 |        | Ishp608 transposase                                                                 | Transcription/dna    |                                                             |     | Protein | X-ray | 2005-10-25 |      |
|             | B | 155 | 36212.60  | 18106.30 |        | Ishp608 transposase                                                                 | Transcription/dna    |                                                             |     | Protein | X-ray | 2005-10-25 |      |
| <b>2A6O</b> | A | 155 | 49699.42  | 18106.30 |        | Ishp608 Transposase                                                                 | Transcription/dna    |                                                             |     | Protein | X-ray | 2005-10-25 |      |
|             |   |     |           |          |        |                                                                                     |                      |                                                             |     | DNA     |       |            |      |
|             | B | 155 | 49699.42  | 18106.30 |        | Ishp608 Transposase                                                                 | Transcription/dna    |                                                             |     | Protein | X-ray | 2005-10-25 |      |
|             |   |     |           |          |        |                                                                                     |                      |                                                             |     | DNA     |       |            |      |
|             | C | 22  | 49699.42  | 6743.41  |        | 5'-<br>d(*cp*cp*cp*tp*ap*gp*cp*tp*tp*t<br>p*ap*gp*cp*tp*ap*tp*gp*gp*gp*gp*a<br>)-3' | Transcription/dna    |                                                             |     | Protein | X-ray | 2005-10-25 |      |
|             |   |     |           |          |        |                                                                                     |                      |                                                             |     | DNA     |       |            |      |
|             | D | 22  | 49699.42  | 6743.41  |        | 5'-<br>d(*cp*cp*cp*tp*ap*gp*cp*tp*tp*t                                              | Transcription/dna    |                                                             |     | Protein | X-ray | 2005-10-25 |      |
|             |   |     |           |          |        |                                                                                     |                      |                                                             |     | DNA     |       |            |      |

| p*ap*gp*cp*tp*ap*tp*gp*gp*gp*gp*a |   |     |           |          |        |                                                     |                      |                                   |     |         |       |                 |
|-----------------------------------|---|-----|-----------|----------|--------|-----------------------------------------------------|----------------------|-----------------------------------|-----|---------|-------|-----------------|
| )-3'                              |   |     |           |          |        |                                                     |                      |                                   |     |         |       |                 |
| <b>2A9E</b>                       | A | 505 | 118913.44 | 58794.70 | 59.04  | Kata Catalase                                       | Oxidoreductase       | Acetate ion                       | ACT | Protein | X-ray | 2006-06-20      |
|                                   | A | 505 | 118913.44 | 58794.70 | 616.50 | Kata Catalase                                       | Oxidoreductase       | Protoporphyrin ix containing fe   | HEM | Protein | X-ray | 2006-06-20      |
|                                   | A | 505 | 118913.44 | 58794.70 | 165.21 | Kata Catalase                                       | Oxidoreductase       | S-oxymethionine                   | MHO | Protein | X-ray | 2006-06-20      |
|                                   | A | 505 | 118913.44 | 58794.70 | 16.00  | Kata Catalase                                       | Oxidoreductase       | Oxygen atom                       | O   | Protein | X-ray | 2006-06-20      |
|                                   | B | 505 | 118913.44 | 58794.70 | 616.50 | Kata Catalase                                       | Oxidoreductase       | Protoporphyrin ix containing fe   | HEM | Protein | X-ray | 2006-06-20      |
|                                   | B | 505 | 118913.44 | 58794.70 | 165.21 | Kata Catalase                                       | Oxidoreductase       | S-oxymethionine                   | MHO | Protein | X-ray | 2006-06-20      |
|                                   | B | 505 | 118913.44 | 58794.70 | 16.00  | Kata Catalase                                       | Oxidoreductase       | Oxygen atom                       | O   | Protein | X-ray | 2006-06-20      |
| <b>2ATZ</b>                       | A | 180 | 22049.45  | 21480.20 | 507.18 | H. Pylori predicted coding region<br>hp0184         | SG, unknown function | 2'-deoxyguanosine-5'-triphosphate | DGT | Protein | X-ray | 2005-10-11 MCSG |
|                                   | A | 180 | 22049.45  | 21480.20 | 62.07  | H. Pylori predicted coding region<br>hp0184         | SG, unknown function | 1,2-ethanediol                    | EDO | Protein | X-ray | 2005-10-11 MCSG |
|                                   | A | 180 | 22049.45  | 21480.20 | 196.11 | H. Pylori predicted coding region<br>hp0184         | SG, unknown function | Selenomethionine                  | MSE | Protein | X-ray | 2005-10-11 MCSG |
| <b>2B7N</b>                       | A | 273 | 93342.24  | 30850.90 | 167.12 | Probable nicotinate-nucleotide<br>pyrophosphorylase | Transferase          | Quinolinic acid                   | NTM | Protein | X-ray | 2006-02-14      |
|                                   | A | 273 | 93342.24  | 30850.90 | 96.06  | Probable nicotinate-nucleotide<br>pyrophosphorylase | Transferase          | Sulfate ion                       | SO4 | Protein | X-ray | 2006-02-14      |
|                                   | B | 273 | 93342.24  | 30850.90 | 167.12 | Probable nicotinate-nucleotide<br>pyrophosphorylase | Transferase          | Quinolinic acid                   | NTM | Protein | X-ray | 2006-02-14      |
|                                   | B | 273 | 93342.24  | 30850.90 | 96.06  | Probable nicotinate-nucleotide<br>pyrophosphorylase | Transferase          | Sulfate ion                       | SO4 | Protein | X-ray | 2006-02-14      |
|                                   | C | 273 | 93342.24  | 30850.90 | 167.12 | Probable nicotinate-nucleotide<br>pyrophosphorylase | Transferase          | Quinolinic acid                   | NTM | Protein | X-ray | 2006-02-14      |
|                                   | C | 273 | 93342.24  | 30850.90 | 96.06  | Probable nicotinate-nucleotide<br>pyrophosphorylase | Transferase          | Sulfate ion                       | SO4 | Protein | X-ray | 2006-02-14      |
| <b>2B7P</b>                       | A | 273 | 93339.28  | 30850.90 | 166.13 | Probable nicotinate-nucleotide<br>pyrophosphorylase | Transferase          | Phthalic acid                     | PHT | Protein | X-ray | 2006-02-14      |
|                                   | A | 273 | 93339.28  | 30850.90 | 96.06  | Probable nicotinate-nucleotide<br>pyrophosphorylase | Transferase          | Sulfate ion                       | SO4 | Protein | X-ray | 2006-02-14      |

|             |   |     |           |          |        |                                                  |                     |                                                  |     |         |       |            |
|-------------|---|-----|-----------|----------|--------|--------------------------------------------------|---------------------|--------------------------------------------------|-----|---------|-------|------------|
|             | B | 273 | 93339.28  | 30850.90 | 166.13 | Probable nicotinate-nucleotide pyrophosphorylase | Transferase         | Phthalic acid                                    | PHT | Protein | X-ray | 2006-02-14 |
|             | B | 273 | 93339.28  | 30850.90 | 96.06  | Probable nicotinate-nucleotide pyrophosphorylase | Transferase         | Sulfate ion                                      | SO4 | Protein | X-ray | 2006-02-14 |
|             | C | 273 | 93339.28  | 30850.90 | 166.13 | Probable nicotinate-nucleotide pyrophosphorylase | Transferase         | Phthalic acid                                    | PHT | Protein | X-ray | 2006-02-14 |
|             | C | 273 | 93339.28  | 30850.90 | 96.06  | Probable nicotinate-nucleotide pyrophosphorylase | Transferase         | Sulfate ion                                      | SO4 | Protein | X-ray | 2006-02-14 |
| <b>2B7Q</b> | A | 273 | 93558.32  | 30850.90 | 335.21 | Probable nicotinate-nucleotide pyrophosphorylase | Transferase         | Nicotinate mononucleotide                        | NCN | Protein | X-ray | 2006-02-21 |
|             | B | 273 | 93558.32  | 30850.90 | 335.21 | Probable nicotinate-nucleotide pyrophosphorylase | Transferase         | Nicotinate mononucleotide                        | NCN | Protein | X-ray | 2006-02-21 |
|             | C | 273 | 93558.32  | 30850.90 | 335.21 | Probable nicotinate-nucleotide pyrophosphorylase | Transferase         | Nicotinate mononucleotide                        | NCN | Protein | X-ray | 2006-02-21 |
| <b>2BHV</b> | A | 246 | 163102.81 | 27183.80 |        | Comb10                                           | Bacterial protein   |                                                  |     | Protein | X-ray | 2005-03-16 |
|             | B | 246 | 163102.81 | 27183.80 |        | Comb10                                           | Bacterial protein   |                                                  |     | Protein | X-ray | 2005-03-16 |
|             | C | 246 | 163102.81 | 27183.80 |        | Comb10                                           | Bacterial protein   |                                                  |     | Protein | X-ray | 2005-03-16 |
|             | D | 246 | 163102.81 | 27183.80 |        | Comb10                                           | Bacterial protein   |                                                  |     | Protein | X-ray | 2005-03-16 |
|             | E | 246 | 163102.81 | 27183.80 |        | Comb10                                           | Bacterial protein   |                                                  |     | Protein | X-ray | 2005-03-16 |
|             | F | 246 | 163102.81 | 27183.80 |        | Comb10                                           | Bacterial protein   |                                                  |     | Protein | X-ray | 2005-03-16 |
| <b>2BMV</b> | A | 164 | 17668.11  | 17512.50 | 120.15 | Flavodoxin                                       | Electron transport  | Benzamidine                                      | BEN | Protein | X-ray | 2006-06-22 |
|             | A | 164 | 17668.11  | 17512.50 | 35.45  | Flavodoxin                                       | Electron transport  | Chloride ion                                     | CL  | Protein | X-ray | 2006-06-22 |
| <b>2BO3</b> | A | 94  | 11101.70  | 11101.70 |        | Hypothetical protein hp0242                      | SG,unknown function |                                                  |     | Protein | X-ray | 2006-06-22 |
| <b>2BQX</b> | A | 173 | 19298.10  | 19298.10 |        | Inorganic pyrophosphatase                        | Hydrolase           |                                                  |     | Protein | X-ray | 2006-10-18 |
| <b>2BQY</b> | A | 173 | 19474.06  | 19298.10 | 175.96 | Inorganic pyrophosphatase                        | Hydrolase           | Pyrophosphate 2-                                 | POP | Protein | X-ray | 2006-10-18 |
| <b>2C4V</b> | A | 167 | 18691.53  | 18499.40 | 192.12 | 3-dehydroquinate dehydratase                     | Lyase               | Citric acid                                      | CIT | Protein | X-ray | 2006-02-22 |
| <b>2C4W</b> | A | 176 | 20056.08  | 19390.40 | 343.32 | 3-dehydroquinate dehydratase                     | Lyase               | N-tetrazol-5-yl 9-oxo-9h-xanthene-2 sulphonamide | GAJ | Protein | X-ray | 2006-02-22 |
|             | A | 176 | 20056.08  | 19390.40 | 92.09  | 3-dehydroquinate dehydratase                     | Lyase               | Glycerol                                         | GOL | Protein | X-ray | 2006-02-22 |
|             | A | 176 | 20056.08  | 19390.40 | 69.09  | 3-dehydroquinate dehydratase                     | Lyase               | Imidazole                                        | IMD | Protein | X-ray | 2006-02-22 |
| <b>2C57</b> | A | 180 | 241596.66 | 19958.90 | 174.15 | 3-dehydroquinate dehydratase                     | Lyase               | 2,3 -anhydro-quinic acid                         | FA1 | Protein | X-ray | 2006-02-22 |

|             |   |     |           |          |        |                                      |                            |                          |     |         |       |            |
|-------------|---|-----|-----------|----------|--------|--------------------------------------|----------------------------|--------------------------|-----|---------|-------|------------|
|             | B | 180 | 241596.66 | 19958.90 | 174.15 | 3-dehydroquinate dehydratase         | Lyase                      | 2,3 -anhydro-quinic acid | FA1 | Protein | X-ray | 2006-02-22 |
|             | C | 180 | 241596.66 | 19958.90 | 174.15 | 3-dehydroquinate dehydratase         | Lyase                      | 2,3 -anhydro-quinic acid | FA1 | Protein | X-ray | 2006-02-22 |
|             | D | 180 | 241596.66 | 19958.90 | 174.15 | 3-dehydroquinate dehydratase         | Lyase                      | 2,3 -anhydro-quinic acid | FA1 | Protein | X-ray | 2006-02-22 |
|             | E | 180 | 241596.66 | 19958.90 | 174.15 | 3-dehydroquinate dehydratase         | Lyase                      | 2,3 -anhydro-quinic acid | FA1 | Protein | X-ray | 2006-02-22 |
|             | F | 180 | 241596.66 | 19958.90 | 174.15 | 3-dehydroquinate dehydratase         | Lyase                      | 2,3 -anhydro-quinic acid | FA1 | Protein | X-ray | 2006-02-22 |
|             | G | 180 | 241596.66 | 19958.90 | 174.15 | 3-dehydroquinate dehydratase         | Lyase                      | 2,3 -anhydro-quinic acid | FA1 | Protein | X-ray | 2006-02-22 |
|             | H | 180 | 241596.66 | 19958.90 | 174.15 | 3-dehydroquinate dehydratase         | Lyase                      | 2,3 -anhydro-quinic acid | FA1 | Protein | X-ray | 2006-02-22 |
|             | I | 180 | 241596.66 | 19958.90 | 174.15 | 3-dehydroquinate dehydratase         | Lyase                      | 2,3 -anhydro-quinic acid | FA1 | Protein | X-ray | 2006-02-22 |
|             | J | 180 | 241596.66 | 19958.90 | 174.15 | 3-dehydroquinate dehydratase         | Lyase                      | 2,3 -anhydro-quinic acid | FA1 | Protein | X-ray | 2006-02-22 |
|             | K | 180 | 241596.66 | 19958.90 | 174.15 | 3-dehydroquinate dehydratase         | Lyase                      | 2,3 -anhydro-quinic acid | FA1 | Protein | X-ray | 2006-02-22 |
|             | L | 180 | 241596.66 | 19958.90 | 174.15 | 3-dehydroquinate dehydratase         | Lyase                      | 2,3 -anhydro-quinic acid | FA1 | Protein | X-ray | 2006-02-22 |
| <b>2CA9</b> | A | 148 | 34939.26  | 17170.40 | 46.03  | Putative nickel-responsive regulator | Transcriptional regulation | Formic acid              | FMT | Protein | X-ray | 2006-07-17 |
|             | A | 148 | 34939.26  | 17170.40 | 92.09  | Putative nickel-responsive regulator | Transcriptional regulation | Glycerol                 | GOL | Protein | X-ray | 2006-07-17 |
|             | B | 148 | 34939.26  | 17170.40 | 46.03  | Putative nickel-responsive regulator | Transcriptional regulation | Formic acid              | FMT | Protein | X-ray | 2006-07-17 |
|             | B | 148 | 34939.26  | 17170.40 | 92.09  | Putative nickel-responsive regulator | Transcriptional regulation | Glycerol                 | GOL | Protein | X-ray | 2006-07-17 |
| <b>2CAD</b> | A | 148 | 35169.41  | 17170.40 | 46.03  | Putative nickel-responsive regulator | Transcriptional regulation | Formic acid              | FMT | Protein | X-ray | 2006-07-17 |
|             | A | 148 | 35169.41  | 17170.40 | 92.09  | Putative nickel-responsive regulator | Transcriptional regulation | Glycerol                 | GOL | Protein | X-ray | 2006-07-17 |
|             | A | 148 | 35169.41  | 17170.40 | 58.70  | Putative nickel-responsive regulator | Transcriptional regulation | Nickel (ii) ion          | NI  | Protein | X-ray | 2006-07-17 |
|             | B | 148 | 35169.41  | 17170.40 | 192.12 | Putative nickel-responsive regulator | Transcriptional regulation | Citric acid              | CIT | Protein | X-ray | 2006-07-17 |
|             | B | 148 | 35169.41  | 17170.40 | 92.09  | Putative nickel-responsive regulator | Transcriptional regulation | Glycerol                 | GOL | Protein | X-ray | 2006-07-17 |
|             | B | 148 | 35169.41  | 17170.40 | 58.70  | Putative nickel-responsive regulator | Transcriptional regulation | Nickel (ii) ion          | NI  | Protein | X-ray | 2006-07-17 |

|             |   |     |           |          |        |                                      |                            |                  |     |         |       |            |
|-------------|---|-----|-----------|----------|--------|--------------------------------------|----------------------------|------------------|-----|---------|-------|------------|
| <b>2CAJ</b> | A | 148 | 35046.22  | 17170.40 | 92.09  | Putative nickel-responsive regulator | Transcriptional regulation | Glycerol         | GOL | Protein | X-ray | 2006-07-17 |
|             | B | 148 | 35046.22  | 17170.40 | 35.45  | Putative nickel-responsive regulator | Transcriptional regulation | Chloride ion     | CL  | Protein | X-ray | 2006-07-17 |
|             | B | 148 | 35046.22  | 17170.40 | 92.09  | Putative nickel-responsive regulator | Transcriptional regulation | Glycerol         | GOL | Protein | X-ray | 2006-07-17 |
|             | B | 148 | 35046.22  | 17170.40 | 58.70  | Putative nickel-responsive regulator | Transcriptional regulation | Nickel (ii) ion  | NI  | Protein | X-ray | 2006-07-17 |
| <b>2CMG</b> | A | 262 | 61171.80  | 30585.90 |        | Spermidine synthase                  | Transferase                |                  |     | Protein | X-ray | 2007-05-08 |
|             | B | 262 | 61171.80  | 30585.90 |        | Spermidine synthase                  | Transferase                |                  |     | Protein | X-ray | 2007-05-08 |
| <b>2CMH</b> | A | 262 | 91757.70  | 30585.90 |        | Spermidine synthase                  | Transferase                |                  |     | Protein | X-ray | 2007-05-08 |
|             | B | 262 | 91757.70  | 30585.90 |        | Spermidine synthase                  | Transferase                |                  |     | Protein | X-ray | 2007-05-08 |
|             | C | 262 | 91757.70  | 30585.90 |        | Spermidine synthase                  | Transferase                |                  |     | Protein | X-ray | 2007-05-08 |
| <b>2CMU</b> | A | 342 | 39349.10  | 39349.10 | 196.11 | Putative peptidyl-arginine deiminase | Hydrolase                  | Selenomethionine | MSE | Protein | X-ray | 2006-05-24 |
| <b>2D2R</b> | A | 245 | 57152.20  | 28576.10 |        | Undecaprenyl pyrophosphate synthase  | Transferase                |                  |     | Protein | X-ray | 2006-09-26 |
|             | B | 245 | 57152.20  | 28576.10 |        | Undecaprenyl pyrophosphate synthase  | Transferase                |                  |     | Protein | X-ray | 2006-09-26 |
| <b>2DTN</b> | A | 245 | 57326.14  | 28576.10 |        | Undecaprenyl pyrophosphate synthase  | Transferase                |                  |     | Protein | X-ray | 2007-06-26 |
|             | B | 245 | 57326.14  | 28576.10 | 173.94 | Undecaprenyl pyrophosphate synthase  | Transferase                | Diphosphate      | DPO | Protein | X-ray | 2007-06-26 |
| <b>2DYU</b> | A | 334 | 74661.40  | 37330.70 |        | Formamidase                          | Hydrolase                  |                  |     | Protein | X-ray | 2007-02-13 |
|             | B | 334 | 74661.40  | 37330.70 |        | Formamidase                          | Hydrolase                  |                  |     | Protein | X-ray | 2007-02-13 |
| <b>2DYV</b> | A | 334 | 74661.40  | 37330.70 |        | Formamidase                          | Hydrolase                  |                  |     | Protein | X-ray | 2007-02-13 |
|             | B | 334 | 74661.40  | 37330.70 |        | Formamidase                          | Hydrolase                  |                  |     | Protein | X-ray | 2007-02-13 |
| <b>2E2K</b> | A | 334 | 223888.19 | 37314.70 |        | Formamidase                          | Hydrolase                  |                  |     | Protein | X-ray | 2007-02-13 |
|             | B | 334 | 223888.19 | 37314.70 |        | Formamidase                          | Hydrolase                  |                  |     | Protein | X-ray | 2007-02-13 |
|             | C | 334 | 223888.19 | 37314.70 |        | Formamidase                          | Hydrolase                  |                  |     | Protein | X-ray | 2007-02-13 |
|             | D | 334 | 223888.19 | 37314.70 |        | Formamidase                          | Hydrolase                  |                  |     | Protein | X-ray | 2007-02-13 |
|             | E | 334 | 223888.19 | 37314.70 |        | Formamidase                          | Hydrolase                  |                  |     | Protein | X-ray | 2007-02-13 |
|             | F | 334 | 223888.19 | 37314.70 |        | Formamidase                          | Hydrolase                  |                  |     | Protein | X-ray | 2007-02-13 |
|             |   |     |           |          |        |                                      |                            |                  |     |         |       |            |
| <b>2E2L</b> | A | 334 | 224023.31 | 37314.70 | 45.04  | Formamidase                          | Hydrolase                  | Formamide        | ARF | Protein | X-ray | 2007-02-13 |
|             | B | 334 | 224023.31 | 37314.70 |        | Formamidase                          | Hydrolase                  |                  |     | Protein | X-ray | 2007-02-13 |
|             | C | 334 | 224023.31 | 37314.70 | 45.04  | Formamidase                          | Hydrolase                  | Formamide        | ARF | Protein | X-ray | 2007-02-13 |

|             |   |     |           |          |        |                             |                      |                                                                               |     |         |       |            |                     |
|-------------|---|-----|-----------|----------|--------|-----------------------------|----------------------|-------------------------------------------------------------------------------|-----|---------|-------|------------|---------------------|
|             | D | 334 | 224023.31 | 37314.70 |        | Formamidase                 | Hydrolase            |                                                                               |     | Protein | X-ray | 2007-02-13 |                     |
|             | E | 334 | 224023.31 | 37314.70 |        | Formamidase                 | Hydrolase            |                                                                               |     | Protein | X-ray | 2007-02-13 |                     |
|             | F | 334 | 224023.31 | 37314.70 | 45.04  | Formamidase                 | Hydrolase            | Formamide                                                                     | ARF | Protein | X-ray | 2007-02-13 |                     |
| <b>2EVV</b> | A | 207 | 95692.83  | 23807.10 | 92.09  | Hypothetical protein HP0218 | SG, unknown function | Glycerol                                                                      | GOL | Protein | X-ray | 2005-12-13 | MCSG                |
|             | A | 207 | 95692.83  | 23807.10 | 196.11 | Hypothetical protein HP0218 | SG, unknown function | Selenomethionine                                                              | MSE | Protein | X-ray | 2005-12-13 | MCSG                |
|             | B | 207 | 95692.83  | 23807.10 | 92.09  | Hypothetical protein HP0218 | SG, unknown function | Glycerol                                                                      | GOL | Protein | X-ray | 2005-12-13 | MCSG                |
|             | B | 207 | 95692.83  | 23807.10 | 196.11 | Hypothetical protein HP0218 | SG, unknown function | Selenomethionine                                                              | MSE | Protein | X-ray | 2005-12-13 | MCSG                |
|             | B | 207 | 95692.83  | 23807.10 | 96.06  | Hypothetical protein HP0218 | SG, unknown function | Sulfate ion                                                                   | SO4 | Protein | X-ray | 2005-12-13 | MCSG                |
|             | C | 207 | 95692.83  | 23807.10 | 92.09  | Hypothetical protein HP0218 | SG, unknown function | Glycerol                                                                      | GOL | Protein | X-ray | 2005-12-13 | MCSG                |
|             | C | 207 | 95692.83  | 23807.10 | 196.11 | Hypothetical protein HP0218 | SG, unknown function | Selenomethionine                                                              | MSE | Protein | X-ray | 2005-12-13 | MCSG                |
|             | D | 207 | 95692.83  | 23807.10 | 92.09  | Hypothetical protein HP0218 | SG, unknown function | Glycerol                                                                      | GOL | Protein | X-ray | 2005-12-13 | MCSG                |
|             | D | 207 | 95692.83  | 23807.10 | 196.11 | Hypothetical protein HP0218 | SG, unknown function | Selenomethionine                                                              | MSE | Protein | X-ray | 2005-12-13 | MCSG                |
| <b>2EW5</b> | A | 181 | 21434.93  | 21008.60 | 58.93  | Peptide deformylase         | Hydrolase            | Cobalt (ii) ion                                                               | CO  | Protein | X-ray | 2006-10-24 |                     |
|             | A | 181 | 21434.93  | 21008.60 | 367.40 | Peptide deformylase         | Hydrolase            | 4-((1e)-3-oxo-3-[(2-phenylethyl)amino]prop-1-en-1-yl)-1,2-phenylene diacetate | Y12 | Protein | X-ray | 2006-10-24 |                     |
| <b>2EW6</b> | A | 181 | 21366.86  | 21008.60 | 58.93  | Peptide deformylase         | Hydrolase            | Cobalt (ii) ion                                                               | CO  | Protein | X-ray | 2006-10-24 |                     |
|             | A | 181 | 21366.86  | 21008.60 | 299.33 | Peptide deformylase         | Hydrolase            | (2e)-3-(3,4-dihydroxyphenyl)-n-[2-(4-hydroxyphenyl)ethyl]acrylamide           | Y13 | Protein | X-ray | 2006-10-24 |                     |
| <b>2EW7</b> | A | 181 | 21067.53  | 21008.60 | 58.93  | Peptide deformylase         | Hydrolase            | Cobalt (ii) ion                                                               | CO  | Protein | X-ray | 2006-10-24 |                     |
| <b>2F6S</b> | A | 201 | 47249.90  | 23464.60 | 196.11 | Cellprotein, putative       | SG, unknown function | Selenomethionine                                                              | MSE | Protein | X-ray | 2006-01-10 | MCSG                |
|             | A | 201 | 47249.90  | 23464.60 | 94.97  | Cellprotein, putative       | SG, unknown function | Phosphate ion                                                                 | PO4 | Protein | X-ray | 2006-01-10 | MCSG                |
|             | A | 201 | 47249.90  | 23464.60 | 65.38  | Cellprotein, putative       | SG, unknown function | Zinc ion                                                                      | ZN  | Protein | X-ray | 2006-01-10 | MCSG                |
|             | B | 201 | 47249.90  | 23464.60 | 196.11 | Cellprotein, putative       | SG, unknown function | Selenomethionine                                                              | MSE | Protein | X-ray | 2006-01-10 | MCSG                |
|             | B | 201 | 47249.90  | 23464.60 | 94.97  | Cellprotein, putative       | SG, unknown function | Phosphate ion                                                                 | PO4 | Protein | X-ray | 2006-01-10 | MCSG                |
|             | B | 201 | 47249.90  | 23464.60 | 65.38  | Cellprotein, putative       | SG, unknown function | Zinc ion                                                                      | ZN  | Protein | X-ray | 2006-01-10 | MCSG                |
| <b>2FN6</b> | A | 375 | 85108.34  | 42459.20 | 94.97  | Aminotransferase            | Transferase          | Phosphate ion                                                                 | PO4 | Protein | X-ray | 2006-01-24 | MKBSGI <sup>d</sup> |
|             | B | 375 | 85108.34  | 42459.20 | 94.97  | Aminotransferase            | Transferase          | Phosphate ion                                                                 | PO4 | Protein | X-ray | 2006-01-24 | MKBSGI              |
| <b>2FNI</b> | A | 375 | 85412.69  | 42459.20 | 247.14 | Aminotransferase            | Transferase          | Pyridoxal-5'-phosphate                                                        | PLP | Protein | X-ray | 2006-01-24 | MKBSGI              |
|             | B | 375 | 85412.69  | 42459.20 | 247.14 | Aminotransferase            | Transferase          | Pyridoxal-5'-phosphate                                                        | PLP | Protein | X-ray | 2006-01-24 | MKBSGI              |
| <b>2FNU</b> | A | 375 | 86629.46  | 42459.20 | 248.18 | Aminotransferase            | Transferase          | 4'-deoxy-4'-aminopyridoxal-5'                                                 | PMP | Protein | X-ray | 2006-01-24 | MKBSGI              |

|             |   |     |           |          |        |                                               |                  |                                         |     |         |       |            |        |
|-------------|---|-----|-----------|----------|--------|-----------------------------------------------|------------------|-----------------------------------------|-----|---------|-------|------------|--------|
|             |   |     |           |          |        |                                               | phosphate        |                                         |     |         |       |            |        |
|             | A | 375 | 86629.46  | 42459.20 | 607.36 | Aminotransferase                              | Transferase      | Uridine-diphosphate-n-acetylglucosamine | UD1 | Protein | X-ray | 2006-01-24 | MKBSGI |
|             | B | 375 | 86629.46  | 42459.20 | 248.18 | Aminotransferase                              | Transferase      | 4'-deoxy-4'-aminopyridoxal-5'-phosphate | PMP | Protein | X-ray | 2006-01-24 | MKBSGI |
|             | B | 375 | 86629.46  | 42459.20 | 607.36 | Aminotransferase                              | Transferase      | Uridine-diphosphate-n-acetylglucosamine | UD1 | Protein | X-ray | 2006-01-24 | MKBSGI |
| <b>2G3V</b> | A | 208 | 104975.36 | 25537.10 | 196.11 | Cagprotein 13                                 | Unknown function | Selenomethionine                        | MSE | Protein | X-ray | 2007-03-06 |        |
|             | B | 208 | 104975.36 | 25537.10 | 196.11 | Cagprotein 13                                 | Unknown function | Selenomethionine                        | MSE | Protein | X-ray | 2007-03-06 |        |
|             | C | 208 | 104975.36 | 25537.10 | 196.11 | Cagprotein 13                                 | Unknown function | Selenomethionine                        | MSE | Protein | X-ray | 2007-03-06 |        |
|             | D | 208 | 104975.36 | 25537.10 | 196.11 | Cagprotein 13                                 | Unknown function | Selenomethionine                        | MSE | Protein | X-ray | 2007-03-06 |        |
|             | E | 7   | 104975.36 | 706.74   | 196.11 | (Unk)(unk)(unk)(unk)(unk)(mse)(unk)           | Unknown function | Selenomethionine                        | MSE | Protein | X-ray | 2007-03-06 |        |
|             | E | 7   | 104975.36 | 706.74   | 103.12 | (Unk)(unk)(unk)(unk)(unk)(mse)(unk)           | Unknown function | Unknown                                 | UNK | Protein | X-ray | 2007-03-06 |        |
|             | F | 7   | 104975.36 | 706.74   | 196.11 | (Unk)(unk)(unk)(unk)(unk)(mse)(unk)           | Unknown function | Selenomethionine                        | MSE | Protein | X-ray | 2007-03-06 |        |
|             | F | 7   | 104975.36 | 706.74   | 103.12 | (Unk)(unk)(unk)(unk)(unk)(mse)(unk)           | Unknown function | Unknown                                 | UNK | Protein | X-ray | 2007-03-06 |        |
|             | G | 7   | 104975.36 | 706.74   | 196.11 | (Unk)(unk)(unk)(unk)(unk)(mse)(unk)           | Unknown function | Selenomethionine                        | MSE | Protein | X-ray | 2007-03-06 |        |
|             | G | 7   | 104975.36 | 706.74   | 103.12 | (Unk)(unk)(unk)(unk)(unk)(mse)(unk)           | Unknown function | Unknown                                 | UNK | Protein | X-ray | 2007-03-06 |        |
| <b>2GLL</b> | H | 7   | 104975.36 | 706.74   | 196.11 | (Unk)(unk)(unk)(unk)(unk)(mse)(unk)           | Unknown function | Selenomethionine                        | MSE | Protein | X-ray | 2007-03-06 |        |
|             | H | 7   | 104975.36 | 706.74   | 103.12 | (Unk)(unk)(unk)(unk)(unk)(mse)(unk)           | Unknown function | Unknown                                 | UNK | Protein | X-ray | 2007-03-06 |        |
|             | A | 171 | 118844.75 | 19611.80 | 120.15 | (3R)-hydroxymyristoyl-acylprotein dehydratase | Lyase            | Benzamidine                             | BEN | Protein | X-ray | 2007-03-13 |        |
|             | A | 171 | 118844.75 | 19611.80 | 35.45  | (3R)-hydroxymyristoyl-acylprotein dehydratase | Lyase            | Chloride ion                            | CL  | Protein | X-ray | 2007-03-13 |        |
|             | B | 171 | 118844.75 | 19611.80 | 120.15 | (3R)-hydroxymyristoyl-acylprotein dehydratase | Lyase            | Benzamidine                             | BEN | Protein | X-ray | 2007-03-13 |        |
|             | B | 171 | 118844.75 | 19611.80 | 35.45  | (3R)-hydroxymyristoyl-acylprotein dehydratase | Lyase            | Chloride ion                            | CL  | Protein | X-ray | 2007-03-13 |        |
|             | C | 171 | 118844.75 | 19611.80 | 120.15 | (3R)-hydroxymyristoyl-acylprotein dehydratase | Lyase            | Benzamidine                             | BEN | Protein | X-ray | 2007-03-13 |        |
|             | C | 171 | 118844.75 | 19611.80 | 35.45  | (3R)-hydroxymyristoyl-acylprotein dehydratase | Lyase            | Chloride ion                            | CL  | Protein | X-ray | 2007-03-13 |        |

|             |   |     |           |          |             |                                   |       |                                                                                                                          |     |         |       |            |
|-------------|---|-----|-----------|----------|-------------|-----------------------------------|-------|--------------------------------------------------------------------------------------------------------------------------|-----|---------|-------|------------|
|             |   |     |           |          | dehydratase |                                   |       |                                                                                                                          |     |         |       |            |
|             | D | 171 | 118844.75 | 19611.80 | 35.45       | (3R)-hydroxymyristoyl-acylprotein | Lyase | Chloride ion                                                                                                             | CL  | Protein | X-ray | 2007-03-13 |
|             |   |     |           |          | dehydratase |                                   |       |                                                                                                                          |     |         |       |            |
|             | E | 171 | 118844.75 | 19611.80 | 120.15      | (3R)-hydroxymyristoyl-acylprotein | Lyase | Benzamidine                                                                                                              | BEN | Protein | X-ray | 2007-03-13 |
|             |   |     |           |          | dehydratase |                                   |       |                                                                                                                          |     |         |       |            |
|             | E | 171 | 118844.75 | 19611.80 | 35.45       | (3R)-hydroxymyristoyl-acylprotein | Lyase | Chloride ion                                                                                                             | CL  | Protein | X-ray | 2007-03-13 |
|             |   |     |           |          | dehydratase |                                   |       |                                                                                                                          |     |         |       |            |
|             | F | 171 | 118844.75 | 19611.80 | 120.15      | (3R)-hydroxymyristoyl-acylprotein | Lyase | Benzamidine                                                                                                              | BEN | Protein | X-ray | 2007-03-13 |
|             |   |     |           |          | dehydratase |                                   |       |                                                                                                                          |     |         |       |            |
|             | F | 171 | 118844.75 | 19611.80 | 35.45       | (3R)-hydroxymyristoyl-acylprotein | Lyase | Chloride ion                                                                                                             | CL  | Protein | X-ray | 2007-03-13 |
|             |   |     |           |          | dehydratase |                                   |       |                                                                                                                          |     |         |       |            |
| <b>2GLM</b> | A | 171 | 119207.54 | 19611.80 | 120.15      | (3R)-hydroxymyristoyl-acylprotein | Lyase | Benzamidine                                                                                                              | BEN | Protein | X-ray | 2007-03-13 |
|             |   |     |           |          | dehydratase |                                   |       |                                                                                                                          |     |         |       |            |
|             | A | 171 | 119207.54 | 19611.80 | 35.45       | (3R)-hydroxymyristoyl-acylprotein | Lyase | Chloride ion                                                                                                             | CL  | Protein | X-ray | 2007-03-13 |
|             |   |     |           |          | dehydratase |                                   |       |                                                                                                                          |     |         |       |            |
|             | A | 171 | 119207.54 | 19611.80 | 482.94      | (3R)-hydroxymyristoyl-acylprotein | Lyase | 2-chloro-5-(5-((e)-[(2z)-3-(2-methoxyethyl)-4-oxo-2-(phenylimino)-1,3-thiazolidin-5-ylidene]methyl)-2-furyl)benzoic acid | SCB | Protein | X-ray | 2007-03-13 |
|             |   |     |           |          | dehydratase |                                   |       |                                                                                                                          |     |         |       |            |
|             | B | 171 | 119207.54 | 19611.80 | 120.15      | (3R)-hydroxymyristoyl-acylprotein | Lyase | Benzamidine                                                                                                              | BEN | Protein | X-ray | 2007-03-13 |
|             |   |     |           |          | dehydratase |                                   |       |                                                                                                                          |     |         |       |            |
|             | B | 171 | 119207.54 | 19611.80 | 35.45       | (3R)-hydroxymyristoyl-acylprotein | Lyase | Chloride ion                                                                                                             | CL  | Protein | X-ray | 2007-03-13 |
|             |   |     |           |          | dehydratase |                                   |       |                                                                                                                          |     |         |       |            |
|             | C | 171 | 119207.54 | 19611.80 | 120.15      | (3R)-hydroxymyristoyl-acylprotein | Lyase | Benzamidine                                                                                                              | BEN | Protein | X-ray | 2007-03-13 |
|             |   |     |           |          | dehydratase |                                   |       |                                                                                                                          |     |         |       |            |
|             | C | 171 | 119207.54 | 19611.80 | 35.45       | (3R)-hydroxymyristoyl-acylprotein | Lyase | Chloride ion                                                                                                             | CL  | Protein | X-ray | 2007-03-13 |
|             |   |     |           |          | dehydratase |                                   |       |                                                                                                                          |     |         |       |            |
|             | D | 171 | 119207.54 | 19611.80 | 120.15      | (3R)-hydroxymyristoyl-acylprotein | Lyase | Benzamidine                                                                                                              | BEN | Protein | X-ray | 2007-03-13 |
|             |   |     |           |          | dehydratase |                                   |       |                                                                                                                          |     |         |       |            |
|             | D | 171 | 119207.54 | 19611.80 | 35.45       | (3R)-hydroxymyristoyl-acylprotein | Lyase | Chloride ion                                                                                                             | CL  | Protein | X-ray | 2007-03-13 |
|             |   |     |           |          | dehydratase |                                   |       |                                                                                                                          |     |         |       |            |

|             |   |     |           |          |        |                                                  |       |                                                                               |     |         |       |            |
|-------------|---|-----|-----------|----------|--------|--------------------------------------------------|-------|-------------------------------------------------------------------------------|-----|---------|-------|------------|
|             | E | 171 | 119207.54 | 19611.80 | 120.15 | (3R)-hydroxymyristoyl-acylprotein<br>dehydratase | Lyase | Benzamidine                                                                   | BEN | Protein | X-ray | 2007-03-13 |
|             | F | 171 | 119207.54 | 19611.80 | 35.45  | (3R)-hydroxymyristoyl-acylprotein<br>dehydratase | Lyase | Chloride ion                                                                  | CL  | Protein | X-ray | 2007-03-13 |
| <b>2GLP</b> | A | 171 | 119915.14 | 19611.80 | 415.04 | (3R)-hydroxymyristoyl-acylprotein<br>dehydratase | Lyase | N'-[(1e)-(3,5-dibromo-2,4-<br>dihydroxyphenyl)methylene]nicotinohy<br>drazide | BDE | Protein | X-ray | 2007-03-13 |
|             | A | 171 | 119915.14 | 19611.80 | 120.15 | (3R)-hydroxymyristoyl-acylprotein<br>dehydratase | Lyase | Benzamidine                                                                   | BEN | Protein | X-ray | 2007-03-13 |
|             | A | 171 | 119915.14 | 19611.80 | 35.45  | (3R)-hydroxymyristoyl-acylprotein<br>dehydratase | Lyase | Chloride ion                                                                  | CL  | Protein | X-ray | 2007-03-13 |
|             | B | 171 | 119915.14 | 19611.80 | 120.15 | (3R)-hydroxymyristoyl-acylprotein<br>dehydratase | Lyase | Benzamidine                                                                   | BEN | Protein | X-ray | 2007-03-13 |
|             | B | 171 | 119915.14 | 19611.80 | 35.45  | (3R)-hydroxymyristoyl-acylprotein<br>dehydratase | Lyase | Chloride ion                                                                  | CL  | Protein | X-ray | 2007-03-13 |
|             | C | 171 | 119915.14 | 19611.80 | 415.04 | (3R)-hydroxymyristoyl-acylprotein<br>dehydratase | Lyase | N'-[(1e)-(3,5-dibromo-2,4-<br>dihydroxyphenyl)methylene]nicotinohy<br>drazide | BDE | Protein | X-ray | 2007-03-13 |
|             | C | 171 | 119915.14 | 19611.80 | 120.15 | (3R)-hydroxymyristoyl-acylprotein<br>dehydratase | Lyase | Benzamidine                                                                   | BEN | Protein | X-ray | 2007-03-13 |
|             | C | 171 | 119915.14 | 19611.80 | 35.45  | (3R)-hydroxymyristoyl-acylprotein<br>dehydratase | Lyase | Chloride ion                                                                  | CL  | Protein | X-ray | 2007-03-13 |
|             | D | 171 | 119915.14 | 19611.80 | 35.45  | (3R)-hydroxymyristoyl-acylprotein<br>dehydratase | Lyase | Chloride ion                                                                  | CL  | Protein | X-ray | 2007-03-13 |
|             | E | 171 | 119915.14 | 19611.80 | 35.45  | (3R)-hydroxymyristoyl-acylprotein<br>dehydratase | Lyase | Chloride ion                                                                  | CL  | Protein | X-ray | 2007-03-13 |
|             | F | 171 | 119915.14 | 19611.80 | 120.15 | (3R)-hydroxymyristoyl-acylprotein<br>dehydratase | Lyase | Benzamidine                                                                   | BEN | Protein | X-ray | 2007-03-13 |
|             | F | 171 | 119915.14 | 19611.80 | 35.45  | (3R)-hydroxymyristoyl-acylprotein<br>dehydratase | Lyase | Chloride ion                                                                  | CL  | Protein | X-ray | 2007-03-13 |
| <b>2GLV</b> | A | 171 | 234661.83 | 19519.70 | 35.45  | (3R)-hydroxymyristoyl-acylprotein                | Lyase | Chloride ion                                                                  | CL  | Protein | X-ray | 2007-03-13 |

|             |     |           |          |          |                                   |                         |              |                                                           |         |         |            |            |
|-------------|-----|-----------|----------|----------|-----------------------------------|-------------------------|--------------|-----------------------------------------------------------|---------|---------|------------|------------|
|             |     |           |          |          | dehydratase                       |                         |              |                                                           |         |         |            |            |
| B           | 171 | 234661.83 | 19519.70 | 35.45    | (3R)-hydroxymyristoyl-acylprotein | Lyase                   | Chloride ion | CL                                                        | Protein | X-ray   | 2007-03-13 |            |
|             |     |           |          |          | dehydratase                       |                         |              |                                                           |         |         |            |            |
| C           | 171 | 234661.83 | 19519.70 | 35.45    | (3R)-hydroxymyristoyl-acylprotein | Lyase                   | Chloride ion | CL                                                        | Protein | X-ray   | 2007-03-13 |            |
|             |     |           |          |          | dehydratase                       |                         |              |                                                           |         |         |            |            |
| D           | 171 | 234661.83 | 19519.70 | 35.45    | (3R)-hydroxymyristoyl-acylprotein | Lyase                   | Chloride ion | CL                                                        | Protein | X-ray   | 2007-03-13 |            |
|             |     |           |          |          | dehydratase                       |                         |              |                                                           |         |         |            |            |
| E           | 171 | 234661.83 | 19519.70 | 35.45    | (3R)-hydroxymyristoyl-acylprotein | Lyase                   | Chloride ion | CL                                                        | Protein | X-ray   | 2007-03-13 |            |
|             |     |           |          |          | dehydratase                       |                         |              |                                                           |         |         |            |            |
| F           | 171 | 234661.83 | 19519.70 | 35.45    | (3R)-hydroxymyristoyl-acylprotein | Lyase                   | Chloride ion | CL                                                        | Protein | X-ray   | 2007-03-13 |            |
|             |     |           |          |          | dehydratase                       |                         |              |                                                           |         |         |            |            |
| G           | 171 | 234661.83 | 19519.70 | 35.45    | (3R)-hydroxymyristoyl-acylprotein | Lyase                   | Chloride ion | CL                                                        | Protein | X-ray   | 2007-03-13 |            |
|             |     |           |          |          | dehydratase                       |                         |              |                                                           |         |         |            |            |
| H           | 171 | 234661.83 | 19519.70 |          | (3R)-hydroxymyristoyl-acylprotein | Lyase                   |              |                                                           | Protein | X-ray   | 2007-03-13 |            |
|             |     |           |          |          | dehydratase                       |                         |              |                                                           |         |         |            |            |
| I           | 171 | 234661.83 | 19519.70 | 35.45    | (3R)-hydroxymyristoyl-acylprotein | Lyase                   | Chloride ion | CL                                                        | Protein | X-ray   | 2007-03-13 |            |
|             |     |           |          |          | dehydratase                       |                         |              |                                                           |         |         |            |            |
| J           | 171 | 234661.83 | 19519.70 |          | (3R)-hydroxymyristoyl-acylprotein | Lyase                   |              |                                                           | Protein | X-ray   | 2007-03-13 |            |
|             |     |           |          |          | dehydratase                       |                         |              |                                                           |         |         |            |            |
| K           | 171 | 234661.83 | 19519.70 | 35.45    | (3R)-hydroxymyristoyl-acylprotein | Lyase                   | Chloride ion | CL                                                        | Protein | X-ray   | 2007-03-13 |            |
|             |     |           |          |          | dehydratase                       |                         |              |                                                           |         |         |            |            |
| L           | 171 | 234661.83 | 19519.70 |          | (3R)-hydroxymyristoyl-acylprotein | Lyase                   |              |                                                           | Protein | X-ray   | 2007-03-13 |            |
|             |     |           |          |          | dehydratase                       |                         |              |                                                           |         |         |            |            |
| <b>2GN4</b> | A   | 344       | 80546.24 | 38725.10 | 745.43                            | UDP-glcnaC6 dehydratase | Lyase        | Nadph dihydro-nicotinamide-adenine-dinucleotide phosphate | NDP     | Protein | X-ray      | 2006-05-09 |
|             | A   | 344       | 80546.24 | 38725.10 | 607.36                            | UDP-glcnaC6 dehydratase | Lyase        | Uridine-diphosphate-n-acetylglucosamine                   | UD1     | Protein | X-ray      | 2006-05-09 |
|             | B   | 344       | 80546.24 | 38725.10 | 195.23                            | UDP-glcnaC6 dehydratase | Lyase        | 2-(n-morpholino)-ethanesulfonic acid                      | MES     | Protein | X-ray      | 2006-05-09 |
|             | B   | 344       | 80546.24 | 38725.10 | 745.43                            | UDP-glcnaC6 dehydratase | Lyase        | Nadph dihydro-nicotinamide-adenine-dinucleotide phosphate | NDP     | Protein | X-ray      | 2006-05-09 |
|             | B   | 344       | 80546.24 | 38725.10 | 607.36                            | UDP-glcnaC6 dehydratase | Lyase        | Uridine-diphosphate-n-                                    | UD1     | Protein | X-ray      | 2006-05-09 |

|      |   |     |          |          |        |                         |                   |                                                  |     |         |       |            |  |
|------|---|-----|----------|----------|--------|-------------------------|-------------------|--------------------------------------------------|-----|---------|-------|------------|--|
|      |   |     |          |          |        |                         | acetylglucosamine |                                                  |     |         |       |            |  |
| 2GN6 | A | 344 | 80346.97 | 38725.10 | 743.41 | UDP-glcnaC6 dehydratase | Lyase             | Nadp nicotinamide-adenine-dinucleotide phosphate | NAP | Protein | X-ray | 2006-05-09 |  |
|      | A | 344 | 80346.97 | 38725.10 | 607.36 | UDP-glcnaC6 dehydratase | Lyase             | Uridine-diphosphate-n-acetylglucosamine          | UD1 | Protein | X-ray | 2006-05-09 |  |
|      | B | 344 | 80346.97 | 38725.10 | 195.23 | UDP-glcnaC6 dehydratase | Lyase             | 2-(n-morpholino)-ethanesulfonic acid             | MES | Protein | X-ray | 2006-05-09 |  |
|      | B | 344 | 80346.97 | 38725.10 | 743.41 | UDP-glcnaC6 dehydratase | Lyase             | Nadp nicotinamide-adenine-dinucleotide phosphate | NAP | Protein | X-ray | 2006-05-09 |  |
|      | B | 344 | 80346.97 | 38725.10 | 607.36 | UDP-glcnaC6 dehydratase | Lyase             | Uridine-diphosphate-n-acetylglucosamine          | UD1 | Protein | X-ray | 2006-05-09 |  |
| 2GN8 | A | 344 | 79940.58 | 38725.10 | 195.23 | UDP-glcnaC6 dehydratase | Lyase             | 2-(n-morpholino)-ethanesulfonic acid             | MES | Protein | X-ray | 2006-05-09 |  |
|      | A | 344 | 79940.58 | 38725.10 | 743.41 | UDP-glcnaC6 dehydratase | Lyase             | Nadp nicotinamide-adenine-dinucleotide phosphate | NAP | Protein | X-ray | 2006-05-09 |  |
|      | A | 344 | 79940.58 | 38725.10 | 404.16 | UDP-glcnaC6 dehydratase | Lyase             | Uridine-5'-diphosphate                           | UDP | Protein | X-ray | 2006-05-09 |  |
|      | B | 344 | 79940.58 | 38725.10 | 743.41 | UDP-glcnaC6 dehydratase | Lyase             | Nadp nicotinamide-adenine-dinucleotide phosphate | NAP | Protein | X-ray | 2006-05-09 |  |
|      | B | 344 | 79940.58 | 38725.10 | 404.16 | UDP-glcnaC6 dehydratase | Lyase             | Uridine-5'-diphosphate                           | UDP | Protein | X-ray | 2006-05-09 |  |
| 2GN9 | A | 344 | 80264.87 | 38725.10 | 743.41 | UDP-glcnaC6 dehydratase | Lyase             | Nadp nicotinamide-adenine-dinucleotide phosphate | NAP | Protein | X-ray | 2006-05-09 |  |
|      | A | 344 | 80264.87 | 38725.10 | 566.30 | UDP-glcnaC6 dehydratase | Lyase             | Uridine-5'-diphosphate-glucose                   | UPG | Protein | X-ray | 2006-05-09 |  |
|      | B | 344 | 80264.87 | 38725.10 | 195.23 | UDP-glcnaC6 dehydratase | Lyase             | 2-(n-morpholino)-ethanesulfonic acid             | MES | Protein | X-ray | 2006-05-09 |  |
|      | B | 344 | 80264.87 | 38725.10 | 743.41 | UDP-glcnaC6 dehydratase | Lyase             | Nadp nicotinamide-adenine-dinucleotide phosphate | NAP | Protein | X-ray | 2006-05-09 |  |
|      | B | 344 | 80264.87 | 38725.10 | 566.30 | UDP-glcnaC6 dehydratase | Lyase             | Uridine-5'-diphosphate-glucose                   | UPG | Protein | X-ray | 2006-05-09 |  |
| 2GNA | A | 344 | 80264.87 | 38725.10 | 566.30 | UDP-glcnaC6 dehydratase | Lyase             | Galactose-uridine-5'-diphosphate                 | GDU | Protein | X-ray | 2006-05-09 |  |
|      | A | 344 | 80264.87 | 38725.10 | 743.41 | UDP-glcnaC6 dehydratase | Lyase             | Nadp nicotinamide-adenine-dinucleotide phosphate | NAP | Protein | X-ray | 2006-05-09 |  |
|      | B | 344 | 80264.87 | 38725.10 | 566.30 | UDP-glcnaC6 dehydratase | Lyase             | Galactose-uridine-5'-diphosphate                 | GDU | Protein | X-ray | 2006-05-09 |  |
|      | B | 344 | 80264.87 | 38725.10 | 195.23 | UDP-glcnaC6 dehydratase | Lyase             | 2-(n-morpholino)-ethanesulfonic acid             | MES | Protein | X-ray | 2006-05-09 |  |
|      | B | 344 | 80264.87 | 38725.10 | 743.41 | UDP-glcnaC6 dehydratase | Lyase             | Nadp nicotinamide-adenine-dinucleotide phosphate | NAP | Protein | X-ray | 2006-05-09 |  |

|             |   |     |           |          |        |                                    |                      |                                                                                                                    |     |         |       |            |                      |
|-------------|---|-----|-----------|----------|--------|------------------------------------|----------------------|--------------------------------------------------------------------------------------------------------------------|-----|---------|-------|------------|----------------------|
| <b>2GTS</b> | A | 86  | 10626.50  | 10626.50 | 196.11 | Hypothetical protein HP0062        | SG, unknown function | Selenomethionine                                                                                                   | MSE | Protein | X-ray | 2006-05-30 | MCSG                 |
| <b>2H0U</b> | A | 217 | 26346.45  | 25890.10 | 456.35 | NADPH-flavin oxidoreductase        | Oxidoreductase       | Flavin mononucleotide                                                                                              | FMN | Protein | X-ray | 2006-06-13 | MCSG                 |
|             | A | 217 | 26346.45  | 25890.10 | 196.11 | NADPH-flavin oxidoreductase        | Oxidoreductase       | Selenomethionine                                                                                                   | MSE | Protein | X-ray | 2006-06-13 | MCSG                 |
| <b>2H1Y</b> | A | 321 | 71607.20  | 35803.60 |        | Malonylprotein transacylase        | Transferase          |                                                                                                                    |     | Protein | X-ray | 2007-05-22 |                      |
|             | B | 321 | 71607.20  | 35803.60 |        | Malonylprotein transacylase        | Transferase          |                                                                                                                    |     | Protein | X-ray | 2007-05-22 |                      |
| <b>2H9Z</b> | A | 86  | 10205.80  | 10205.80 |        | Hypothetical protein HP0495        | SG, unknown function |                                                                                                                    |     | Protein | NMR   | 2007-05-01 |                      |
| <b>2HQN</b> | A | 109 | 12481.40  | 12481.40 |        | Putative transcriptional regulator | Signaling protein    |                                                                                                                    |     | Protein | NMR   | 2007-05-08 |                      |
| <b>2HQO</b> | A | 123 | 27757.80  | 13878.90 |        | Putative transcriptional regulator | Signaling protein    |                                                                                                                    |     | Protein | NMR   | 2007-05-08 |                      |
|             | B | 123 | 27757.80  | 13878.90 |        | Putative transcriptional regulator | Signaling protein    |                                                                                                                    |     | Protein | NMR   | 2007-05-08 |                      |
| <b>2HQR</b> | A | 223 | 50946.60  | 25473.30 |        | Putative transcriptional regulator | Signaling protein    |                                                                                                                    |     | Protein | NMR   | 2007-05-08 |                      |
|             | B | 223 | 50946.60  | 25473.30 |        | Putative transcriptional regulator | Signaling protein    |                                                                                                                    |     | Protein | NMR   | 2007-05-08 |                      |
| <b>2I9I</b> | A | 254 | 29526.70  | 29526.70 |        | Hypothetical protein               | SG, unknown function |                                                                                                                    |     | Protein | X-ray | 2006-09-26 | NYSRCSG <sup>e</sup> |
| <b>2IQF</b> | A | 505 | 118913.44 | 58794.70 | 59.04  | Catalase                           | Oxidoreductase       | Acetate ion                                                                                                        | ACT | Protein | X-ray | 2007-08-28 |                      |
|             | A | 505 | 118913.44 | 58794.70 | 616.50 | Catalase                           | Oxidoreductase       | Protoporphyrin IX containing Fe                                                                                    | HEM | Protein | X-ray | 2007-08-28 |                      |
|             | A | 505 | 118913.44 | 58794.70 | 165.21 | Catalase                           | Oxidoreductase       | S-oxymethionine                                                                                                    | MHO | Protein | X-ray | 2007-08-28 |                      |
|             | A | 505 | 118913.44 | 58794.70 | 16.00  | Catalase                           | Oxidoreductase       | Oxygen atom                                                                                                        | O   | Protein | X-ray | 2007-08-28 |                      |
|             | B | 505 | 118913.44 | 58794.70 | 616.50 | Catalase                           | Oxidoreductase       | Protoporphyrin IX containing Fe                                                                                    | HEM | Protein | X-ray | 2007-08-28 |                      |
|             | B | 505 | 118913.44 | 58794.70 | 165.21 | Catalase                           | Oxidoreductase       | S-oxymethionine                                                                                                    | MHO | Protein | X-ray | 2007-08-28 |                      |
|             | B | 505 | 118913.44 | 58794.70 | 16.00  | Catalase                           | Oxidoreductase       | Oxygen atom                                                                                                        | O   | Protein | X-ray | 2007-08-28 |                      |
| <b>2JFX</b> | A | 255 | 57359.06  | 28532.40 | 147.13 | Glutamate racemase                 | Isomerase            | D-glutamic acid                                                                                                    | DGL | Protein | X-ray | 2007-07-03 |                      |
|             | B | 255 | 57359.06  | 28532.40 | 147.13 | Glutamate racemase                 | Isomerase            | D-glutamic acid                                                                                                    | DGL | Protein | X-ray | 2007-07-03 |                      |
| <b>2JFY</b> | A | 255 | 57359.06  | 28532.40 | 147.13 | Glutamate racemase                 | Isomerase            | D-glutamic acid                                                                                                    | DGL | Protein | X-ray | 2008-02-19 |                      |
|             | B | 255 | 57359.06  | 28532.40 | 147.13 | Glutamate racemase                 | Isomerase            | D-glutamic acid                                                                                                    | DGL | Protein | X-ray | 2008-02-19 |                      |
| <b>2JFZ</b> | A | 255 | 58238.09  | 28532.40 | 439.52 | Glutamate racemase                 | Isomerase            | 5-methyl-7-(2-methylpropyl)-2-(naphthalen-1-ylmethyl)-3-pyridin-4-yl-2h-pyrazolo[3,4-d]pyrimidine-4,6(5h,7h)-dione | 003 | Protein | X-ray | 2007-07-03 |                      |
|             | A | 255 | 58238.09  | 28532.40 | 147.13 | Glutamate racemase                 | Isomerase            | D-glutamic acid                                                                                                    | DGL | Protein | X-ray | 2007-07-03 |                      |
|             | B | 255 | 58238.09  | 28532.40 | 439.52 | Glutamate racemase                 | Isomerase            | 5-methyl-7-(2-methylpropyl)-2-(naphthalen-1-ylmethyl)-3-pyridin-4-yl-2h-pyrazolo[3,4-d]pyrimidine-                 |     |         |       |            |                      |

|             |   |     |           |          |        |                                                    |                          |                                                                    |     |         |       |            |                   |
|-------------|---|-----|-----------|----------|--------|----------------------------------------------------|--------------------------|--------------------------------------------------------------------|-----|---------|-------|------------|-------------------|
|             |   |     |           |          |        |                                                    | 4,6(5h,7h)-dione         |                                                                    |     |         |       |            |                   |
|             | B | 255 | 58238.09  | 28532.40 | 147.13 | Glutamate racemase                                 | Isomerase                | D-glutamic acid                                                    | DGL | Protein | X-ray | 2007-07-03 |                   |
| <b>2JGQ</b> | A | 233 | 53777.39  | 26612.00 | 94.97  | Triosephosphate isomerase                          | Isomerase                | Phosphate ion                                                      | PO4 | Protein | X-ray | 2008-02-26 |                   |
|             | A | 233 | 53777.39  | 26612.00 | 363.45 | Triosephosphate isomerase                          | Isomerase                | 1-[(3-cyclohexylpropanoyl)(2-hydroxyethyl)amino]-1-deoxy-d-allitol | QGA | Protein | X-ray | 2008-02-26 |                   |
|             | B | 233 | 53777.39  | 26612.00 | 94.97  | Triosephosphate isomerase                          | Isomerase                | Phosphate ion                                                      | PO4 | Protein | X-ray | 2008-02-26 |                   |
| <b>2JOQ</b> | A | 91  | 10673.20  | 10673.20 |        | Hypothetical protein HP_0495                       | SG, unknown function     |                                                                    |     | Protein | NMR   | 2007-04-03 | OCSF <sup>f</sup> |
|             | A | 91  | 10673.20  |          |        | Hypothetical protein HP_0495                       | SG, unknown function     |                                                                    |     | Protein | NMR   | 2007-04-03 | NSGC              |
| <b>2K0Z</b> | A | 110 | 12948.60  | 12948.60 |        | Uncharacterized protein hp1203                     | SG, unknown function     |                                                                    |     | Protein | NMR   | 2008-03-04 | NSGC              |
| <b>2K1O</b> | A | 66  | 15603.66  | 7801.83  |        | Putative                                           | Gene regulation          |                                                                    |     | Protein | NMR   | 2008-10-07 |                   |
|             | B | 66  | 15603.66  | 7801.83  |        | Putative                                           | Gene regulation          |                                                                    |     | Protein | NMR   | 2008-10-07 |                   |
| <b>2K4J</b> | A | 115 | 13303.10  | 13303.10 |        | Putative TRANSCRIPTIONAL REGULATOR                 | Transcription            |                                                                    |     | Protein | NMR   | 2008-12-30 |                   |
| <b>2K6P</b> | A | 92  | 10472.30  | 10472.30 |        | Uncharacterized protein HP_1423                    | Unknown function         |                                                                    |     | Protein | NMR   | 2009-06-16 |                   |
| <b>2KDX</b> | A | 119 | 13430.88  | 13365.50 | 65.38  | Hydrogenase/ureaseprotein hypa                     | Metal-binding protein    | Zinc ion                                                           | ZN  | Protein | NMR   | 2009-10-20 |                   |
| <b>2KI2</b> | A | 90  | 10470.00  | 10470.00 |        | Ss-dnaprotein 12RNP2                               | Rnaprotein/ss-dnaprotein |                                                                    |     | Protein | NMR   | 2009-10-20 |                   |
| <b>2KR7</b> | A | 151 | 17039.20  | 17039.20 |        | FKBP-type peptidyl-prolyl cis-trans isomerase slyd | Isomerase                |                                                                    |     | Protein | NMR   | 2010-12-15 |                   |
| <b>2NQO</b> | A | 376 | 121834.00 | 40506.70 |        | Gamma-glutamyltranspeptidase                       | Transferase              |                                                                    |     | Protein | X-ray | 2006-11-21 |                   |
|             | B | 188 | 121834.00 | 20410.30 |        | Gamma-glutamyltranspeptidase                       | Transferase              |                                                                    |     | Protein | X-ray | 2006-11-21 |                   |
|             | C | 376 | 121834.00 | 40506.70 |        | Gamma-glutamyltranspeptidase                       | Transferase              |                                                                    |     | Protein | X-ray | 2006-11-21 |                   |
|             | D | 188 | 121834.00 | 20410.30 |        | Gamma-glutamyltranspeptidase                       | Transferase              |                                                                    |     | Protein | X-ray | 2006-11-21 |                   |
| <b>2NZW</b> | A | 371 | 129659.87 | 43123.90 |        | Alpha1,3-fucosyltransferase                        | Transferase              |                                                                    |     | Protein | X-ray | 2007-01-23 |                   |
|             | B | 371 | 129659.87 | 43123.90 | 96.06  | Alpha1,3-fucosyltransferase                        | Transferase              | Sulfate ion                                                        | SO4 | Protein | X-ray | 2007-01-23 |                   |
|             | C | 371 | 129659.87 | 43123.90 | 96.06  | Alpha1,3-fucosyltransferase                        | Transferase              | Sulfate ion                                                        | SO4 | Protein | X-ray | 2007-01-23 |                   |
| <b>2NZX</b> | A | 371 | 130797.36 | 43123.90 | 443.20 | Alpha1,3-fucosyltransferase                        | Transferase              | Guanosine-5'-diphosphate                                           | GDP | Protein | X-ray | 2007-01-23 |                   |
|             | B | 371 | 130797.36 | 43123.90 | 443.20 | Alpha1,3-fucosyltransferase                        | Transferase              | Guanosine-5'-diphosphate                                           | GDP | Protein | X-ray | 2007-01-23 |                   |
|             | C | 371 | 130797.36 | 43123.90 | 443.20 | Alpha1,3-fucosyltransferase                        | Transferase              | Guanosine-5'-diphosphate                                           | GDP | Protein | X-ray | 2007-01-23 |                   |
|             | C | 371 | 130797.36 | 43123.90 | 96.06  | Alpha1,3-fucosyltransferase                        | Transferase              | Sulfate ion                                                        | SO4 | Protein | X-ray | 2007-01-23 |                   |
| <b>2NZY</b> | A | 371 | 131385.89 | 43123.90 | 164.16 | Alpha1,3-fucosyltransferase                        | Transferase              | Alpha-l-fucose                                                     | FUC | Protein | X-ray | 2007-01-23 |                   |

|             |   |     |           |          |        |                                                  |                      |                                   |     |         |       |            |      |
|-------------|---|-----|-----------|----------|--------|--------------------------------------------------|----------------------|-----------------------------------|-----|---------|-------|------------|------|
|             | A | 371 | 131385.89 | 43123.90 | 443.20 | Alpha1,3-fucosyltransferase                      | Transferase          | Guanosine-5'-diphosphate          | GDP | Protein | X-ray | 2007-01-23 |      |
|             | B | 371 | 131385.89 | 43123.90 | 164.16 | Alpha1,3-fucosyltransferase                      | Transferase          | Alpha-l-fucose                    | FUC | Protein | X-ray | 2007-01-23 |      |
|             | B | 371 | 131385.89 | 43123.90 | 443.20 | Alpha1,3-fucosyltransferase                      | Transferase          | Guanosine-5'-diphosphate          | GDP | Protein | X-ray | 2007-01-23 |      |
|             | B | 371 | 131385.89 | 43123.90 | 96.06  | Alpha1,3-fucosyltransferase                      | Transferase          | Sulfate ion                       | SO4 | Protein | X-ray | 2007-01-23 |      |
|             | C | 371 | 131385.89 | 43123.90 | 164.16 | Alpha1,3-fucosyltransferase                      | Transferase          | Alpha-l-fucose                    | FUC | Protein | X-ray | 2007-01-23 |      |
|             | C | 371 | 131385.89 | 43123.90 | 443.20 | Alpha1,3-fucosyltransferase                      | Transferase          | Guanosine-5'-diphosphate          | GDP | Protein | X-ray | 2007-01-23 |      |
|             | C | 371 | 131385.89 | 43123.90 | 96.06  | Alpha1,3-fucosyltransferase                      | Transferase          | Sulfate ion                       | SO4 | Protein | X-ray | 2007-01-23 |      |
| <b>2ORM</b> | A | 67  | 44336.70  | 7389.45  |        | Probable tautomerase HP0924                      | Isomerase            |                                   |     | Protein | X-ray | 2008-02-12 |      |
|             | B | 67  | 44336.70  | 7389.45  |        | Probable tautomerase HP0924                      | Isomerase            |                                   |     | Protein | X-ray | 2008-02-12 |      |
|             | C | 67  | 44336.70  | 7389.45  |        | Probable tautomerase HP0924                      | Isomerase            |                                   |     | Protein | X-ray | 2008-02-12 |      |
|             | D | 67  | 44336.70  | 7389.45  |        | Probable tautomerase HP0924                      | Isomerase            |                                   |     | Protein | X-ray | 2008-02-12 |      |
|             | E | 67  | 44336.70  | 7389.45  |        | Probable tautomerase HP0924                      | Isomerase            |                                   |     | Protein | X-ray | 2008-02-12 |      |
|             | F | 67  | 44336.70  | 7389.45  |        | Probable tautomerase HP0924                      | Isomerase            |                                   |     | Protein | X-ray | 2008-02-12 |      |
| <b>2OTR</b> | A | 98  | 11502.60  | 11502.60 |        | Hypothetical protein HP0892                      | SG, unknown function |                                   |     | Protein | NMR   | 2007-12-18 |      |
| <b>2OUF</b> | A | 94  | 11148.60  | 11148.60 | 196.11 | Hypothetical protein                             | SG, unknown function | Selenomethionine                  | MSE | Protein | X-ray | 2007-02-27 | MCSG |
| <b>2PD3</b> | A | 275 | 123878.30 | 30016.60 | 663.43 | Enoyl-[acyl-carrier-protein] reductase<br>[NADH] | Oxidoreductase       | Nicotinamide-adenine-dinucleotide | NAD | Protein | X-ray | 2007-04-17 |      |
|             | A | 275 | 123878.30 | 30016.60 | 289.55 | Enoyl-[acyl-carrier-protein] reductase<br>[NADH] | Oxidoreductase       | Triclosan                         | TCL | Protein | X-ray | 2007-04-17 |      |
|             | B | 275 | 123878.30 | 30016.60 | 663.43 | Enoyl-[acyl-carrier-protein] reductase<br>[NADH] | Oxidoreductase       | Nicotinamide-adenine-dinucleotide | NAD | Protein | X-ray | 2007-04-17 |      |
|             | B | 275 | 123878.30 | 30016.60 | 289.55 | Enoyl-[acyl-carrier-protein] reductase<br>[NADH] | Oxidoreductase       | Triclosan                         | TCL | Protein | X-ray | 2007-04-17 |      |
|             | C | 275 | 123878.30 | 30016.60 | 663.43 | Enoyl-[acyl-carrier-protein] reductase<br>[NADH] | Oxidoreductase       | Nicotinamide-adenine-dinucleotide | NAD | Protein | X-ray | 2007-04-17 |      |
|             | C | 275 | 123878.30 | 30016.60 | 289.55 | Enoyl-[acyl-carrier-protein] reductase<br>[NADH] | Oxidoreductase       | Triclosan                         | TCL | Protein | X-ray | 2007-04-17 |      |
|             | D | 275 | 123878.30 | 30016.60 | 663.43 | Enoyl-[acyl-carrier-protein] reductase<br>[NADH] | Oxidoreductase       | Nicotinamide-adenine-dinucleotide | NAD | Protein | X-ray | 2007-04-17 |      |
|             | D | 275 | 123878.30 | 30016.60 | 289.55 | Enoyl-[acyl-carrier-protein] reductase<br>[NADH] | Oxidoreductase       | Triclosan                         | TCL | Protein | X-ray | 2007-04-17 |      |

|             |   |     |           |          |        |                                                  |                              |                                   |     |         |       |            |
|-------------|---|-----|-----------|----------|--------|--------------------------------------------------|------------------------------|-----------------------------------|-----|---------|-------|------------|
| <b>2PD4</b> | A | 275 | 123740.52 | 30016.60 | 255.10 | Enoyl-[acyl-carrier-protein] reductase<br>[NADH] | Oxidoreductase               | Diclosan                          | DCN | Protein | X-ray | 2007-04-17 |
|             | A | 275 | 123740.52 | 30016.60 | 663.43 | Enoyl-[acyl-carrier-protein] reductase<br>[NADH] | Oxidoreductase               | Nicotinamide-adenine-dinucleotide | NAD | Protein | X-ray | 2007-04-17 |
|             | B | 275 | 123740.52 | 30016.60 | 255.10 | Enoyl-[acyl-carrier-protein] reductase<br>[NADH] | Oxidoreductase               | Diclosan                          | DCN | Protein | X-ray | 2007-04-17 |
|             | B | 275 | 123740.52 | 30016.60 | 663.43 | Enoyl-[acyl-carrier-protein] reductase<br>[NADH] | Oxidoreductase               | Nicotinamide-adenine-dinucleotide | NAD | Protein | X-ray | 2007-04-17 |
|             | C | 275 | 123740.52 | 30016.60 | 255.10 | Enoyl-[acyl-carrier-protein] reductase<br>[NADH] | Oxidoreductase               | Diclosan                          | DCN | Protein | X-ray | 2007-04-17 |
|             | C | 275 | 123740.52 | 30016.60 | 663.43 | Enoyl-[acyl-carrier-protein] reductase<br>[NADH] | Oxidoreductase               | Nicotinamide-adenine-dinucleotide | NAD | Protein | X-ray | 2007-04-17 |
|             | D | 275 | 123740.52 | 30016.60 | 255.10 | Enoyl-[acyl-carrier-protein] reductase<br>[NADH] | Oxidoreductase               | Diclosan                          | DCN | Protein | X-ray | 2007-04-17 |
|             | D | 275 | 123740.52 | 30016.60 | 663.43 | Enoyl-[acyl-carrier-protein] reductase<br>[NADH] | Oxidoreductase               | Nicotinamide-adenine-dinucleotide | NAD | Protein | X-ray | 2007-04-17 |
| <b>2PLN</b> | A | 137 | 15663.10  | 15663.10 | 196.11 | Response regulator                               | Signaling protein            | Selenomethionine                  | MSE | Protein | X-ray | 2007-05-01 |
| <b>2PT7</b> | A | 330 | 260955.98 | 37633.20 |        | Cag-alfa                                         | Hydrolase/protein<br>binding |                                   |     | Protein | X-ray | 2007-11-13 |
|             | B | 330 | 260955.98 | 37633.20 |        | Cag-alfa                                         | Hydrolase/protein<br>binding |                                   |     | Protein | X-ray | 2007-11-13 |
|             | C | 330 | 260955.98 | 37633.20 |        | Cag-alfa                                         | Hydrolase/protein<br>binding |                                   |     | Protein | X-ray | 2007-11-13 |
|             | D | 330 | 260955.98 | 37633.20 |        | Cag-alfa                                         | Hydrolase/protein<br>binding |                                   |     | Protein | X-ray | 2007-11-13 |
|             | E | 330 | 260955.98 | 37633.20 |        | Cag-alfa                                         | Hydrolase/protein<br>binding |                                   |     | Protein | X-ray | 2007-11-13 |
|             | F | 330 | 260955.98 | 37633.20 |        | Cag-alfa                                         | Hydrolase/protein<br>binding |                                   |     | Protein | X-ray | 2007-11-13 |
|             | G | 152 | 260955.98 | 17578.40 |        | Hypothetical protein                             | Hydrolase/protein<br>binding |                                   |     | Protein | X-ray | 2007-11-13 |

|      |   |     |           |          |        |                               |                           |                                                  |     |         |       |            |         |
|------|---|-----|-----------|----------|--------|-------------------------------|---------------------------|--------------------------------------------------|-----|---------|-------|------------|---------|
|      | H | 152 | 260955.98 | 17578.40 |        | Hypothetical protein          | Hydrolase/protein binding |                                                  |     | Protein | X-ray | 2007-11-13 |         |
| 2PVP | A | 367 | 83921.40  | 41960.70 |        | D-alanine-D-alanine ligase    | Ligase                    |                                                  |     | Protein | X-ray | 2008-04-01 |         |
|      | B | 367 | 83921.40  | 41960.70 |        | D-alanine-D-alanine ligase    | Ligase                    |                                                  |     | Protein | X-ray | 2008-04-01 |         |
| 2PZH | A | 135 | 63418.00  | 15854.50 |        | Hypothetical protein HP_0496  | Hydrolase                 |                                                  |     | Protein | X-ray | 2008-04-08 |         |
|      | B | 135 | 63418.00  | 15854.50 |        | Hypothetical protein HP_0496  | Hydrolase                 |                                                  |     | Protein | X-ray | 2008-04-08 |         |
|      | C | 135 | 63418.00  | 15854.50 |        | Hypothetical protein HP_0496  | Hydrolase                 |                                                  |     | Protein | X-ray | 2008-04-08 |         |
|      | D | 135 | 63418.00  | 15854.50 |        | Hypothetical protein HP_0496  | Hydrolase                 |                                                  |     | Protein | X-ray | 2008-04-08 |         |
| 2Q0K | A | 311 | 70212.93  | 33577.50 | 785.56 | Thioredoxin reductase         | Oxidoreductase            | Flavin-adenine dinucleotide                      | FAD | Protein | X-ray | 2007-07-03 |         |
|      | A | 311 | 70212.93  | 33577.50 | 743.41 | Thioredoxin reductase         | Oxidoreductase            | Nadp nicotinamide-adenine-dinucleotide phosphate | NAP | Protein | X-ray | 2007-07-03 |         |
|      | B | 311 | 70212.93  | 33577.50 | 785.56 | Thioredoxin reductase         | Oxidoreductase            | Flavin-adenine dinucleotide                      | FAD | Protein | X-ray | 2007-07-03 |         |
|      | B | 311 | 70212.93  | 33577.50 | 743.41 | Thioredoxin reductase         | Oxidoreductase            | Nadp nicotinamide-adenine-dinucleotide phosphate | NAP | Protein | X-ray | 2007-07-03 |         |
| 2Q0L | A | 311 | 70212.93  | 33577.50 | 785.56 | Thioredoxin reductase         | Oxidoreductase            | Flavin-adenine dinucleotide                      | FAD | Protein | X-ray | 2007-07-03 |         |
|      | A | 311 | 70212.93  | 33577.50 | 743.41 | Thioredoxin reductase         | Oxidoreductase            | Nadp nicotinamide-adenine-dinucleotide phosphate | NAP | Protein | X-ray | 2007-07-03 |         |
|      | B | 311 | 70212.93  | 33577.50 | 785.56 | Thioredoxin reductase         | Oxidoreductase            | Flavin-adenine dinucleotide                      | FAD | Protein | X-ray | 2007-07-03 |         |
|      | B | 311 | 70212.93  | 33577.50 | 743.41 | Thioredoxin reductase         | Oxidoreductase            | Nadp nicotinamide-adenine-dinucleotide phosphate | NAP | Protein | X-ray | 2007-07-03 |         |
| 2QGH | A | 425 | 47813.44  | 47474.20 | 92.09  | Diaminopimelate decarboxylase | Lyase                     | Glycerol                                         | GOL | Protein | X-ray | 2008-05-27 |         |
|      | A | 425 | 47813.44  | 47474.20 | 247.14 | Diaminopimelate decarboxylase | Lyase                     | Pyridoxal-5'-phosphate                           | PLP | Protein | X-ray | 2008-05-27 |         |
| 2QH5 | A | 308 | 69996.80  | 34998.40 |        | Mannose-6-phosphate isomerase | Isomerase                 |                                                  |     | Protein | X-ray | 2007-07-17 | NYSRCSG |
|      | B | 308 | 69996.80  | 34998.40 |        | Mannose-6-phosphate isomerase | Isomerase                 |                                                  |     | Protein | X-ray | 2007-07-17 | NYSRCSG |
| 2QM6 | A | 377 | 122270.46 | 40577.80 |        | Gamma-glutamyltranspeptidase  | Transferase               |                                                  |     | Protein | X-ray | 2008-02-12 |         |
|      | B | 188 | 122270.46 | 20410.30 |        | Gamma-glutamyltranspeptidase  | Transferase               |                                                  |     | Protein | X-ray | 2008-02-12 |         |
|      | C | 377 | 122270.46 | 40577.80 |        | Gamma-glutamyltranspeptidase  | Transferase               |                                                  |     | Protein | X-ray | 2008-02-12 |         |
|      | D | 188 | 122270.46 | 20410.30 |        | Gamma-glutamyltranspeptidase  | Transferase               |                                                  |     | Protein | X-ray | 2008-02-12 |         |
| 2QMC | A | 377 | 122801.09 | 40577.80 |        | Gamma-glutamyltranspeptidase  | Transferase               |                                                  |     | Protein | X-ray | 2008-02-12 |         |
|      | B | 188 | 122801.09 | 20380.30 | 442.44 | Gamma-glutamyltranspeptidase  | Transferase               | S-(p-nitrobenzyl)glutathione                     | GTB | Protein | X-ray | 2008-02-12 |         |

|      |   |     |           |          |        |                                     |                     |                              |     |         |       |            |      |
|------|---|-----|-----------|----------|--------|-------------------------------------|---------------------|------------------------------|-----|---------|-------|------------|------|
|      | C | 377 | 122801.09 | 40577.80 |        | Gamma-glutamyltranspeptidase        | Transferase         |                              |     | Protein | X-ray | 2008-02-12 |      |
| 2QMO | D | 188 | 122801.09 | 20380.30 | 442.44 | Gamma-glutamyltranspeptidase        | Transferase         | S-(p-nitrobenzyl)glutathione | GTB | Protein | X-ray | 2008-02-12 |      |
|      | A | 220 | 24888.11  | 24817.20 | 35.45  | Dethiobiotin synthetase             | Ligase              | Chloride ion                 | CL  | Protein | X-ray | 2007-07-31 | MCSG |
|      | A | 220 | 24888.11  | 24817.20 | 196.11 | Dethiobiotin synthetase             | Ligase              | Selenomethionine             | MSE | Protein | X-ray | 2007-07-31 | MCSG |
| 2QV3 | A | 457 | 49391.60  | 49391.60 |        | Vacuolating cytotoxin               | Toxin               |                              |     | Protein | X-ray | 2007-10-23 |      |
| 2R62 | A | 268 | 58219.20  | 29109.60 |        | Cell division protease ftsh homolog | Hydrolase           |                              |     | Protein | X-ray | 2008-09-09 |      |
|      | B | 268 | 58219.20  | 29109.60 |        | Cell division protease ftsh homolog | Hydrolase           |                              |     | Protein | X-ray | 2008-09-09 |      |
| 2R65 | A | 268 | 147684.02 | 29109.60 | 427.20 | Cell division protease ftsh homolog | Hydrolase           | Adenosine-5'-diphosphate     | ADP | Protein | X-ray | 2008-09-09 |      |
|      | B | 268 | 147684.02 | 29109.60 | 427.20 | Cell division protease ftsh homolog | Hydrolase           | Adenosine-5'-diphosphate     | ADP | Protein | X-ray | 2008-09-09 |      |
|      | C | 268 | 147684.02 | 29109.60 | 427.20 | Cell division protease ftsh homolog | Hydrolase           | Adenosine-5'-diphosphate     | ADP | Protein | X-ray | 2008-09-09 |      |
|      | D | 268 | 147684.02 | 29109.60 | 427.20 | Cell division protease ftsh homolog | Hydrolase           | Adenosine-5'-diphosphate     | ADP | Protein | X-ray | 2008-09-09 |      |
|      | E | 268 | 147684.02 | 29109.60 | 427.20 | Cell division protease ftsh homolog | Hydrolase           | Adenosine-5'-diphosphate     | ADP | Protein | X-ray | 2008-09-09 |      |
| 2RD3 | A | 223 | 51330.60  | 25665.30 |        | Transcriptional regulator           | Hydrolase           |                              |     | Protein | X-ray | 2008-09-30 |      |
|      | D | 223 | 51330.60  | 25665.30 |        | Transcriptional regulator           | Hydrolase           |                              |     | Protein | X-ray | 2008-09-30 |      |
| 2UVP | A | 186 | 87079.82  | 21640.10 | 59.04  | Hoba                                | Unknown function    | Acetate ion                  | ACT | Protein | X-ray | 2007-08-21 |      |
|      | B | 186 | 87079.82  | 21626.00 | 40.08  | Hoba                                | Unknown function    | Calcium ion                  | CA  | Protein | X-ray | 2007-08-21 |      |
|      | B | 186 | 87079.82  | 21626.00 | 92.09  | Hoba                                | Unknown function    | Glycerol                     | GOL | Protein | X-ray | 2007-08-21 |      |
|      | C | 186 | 87079.82  | 21626.00 | 59.04  | Hoba                                | Unknown function    | Acetate ion                  | ACT | Protein | X-ray | 2007-08-21 |      |
|      | C | 186 | 87079.82  | 21626.00 | 40.08  | Hoba                                | Unknown function    | Calcium ion                  | CA  | Protein | X-ray | 2007-08-21 |      |
|      | D | 186 | 87079.82  | 21626.00 | 92.09  | Hoba                                | Unknown function    | Glycerol                     | GOL | Protein | X-ray | 2007-08-21 |      |
| 2VHG | A | 159 | 55926.58  | 18392.60 | 54.94  | Transposase orfa                    | Dna-binding protein | Manganese (ii) ion           | MN  | Protein | X-ray | 2008-02-19 |      |
|      |   |     |           |          |        |                                     |                     |                              |     | DNA     |       |            |      |
|      | B | 159 | 55926.58  | 18392.60 |        | Transposase orfa                    | Dna-binding protein |                              |     | Protein | X-ray | 2008-02-19 |      |
|      |   |     |           |          |        |                                     |                     |                              |     | DNA     |       |            |      |
|      | C | 31  | 55926.58  | 9543.22  |        | Right end 31-mer                    | Dna-binding protein |                              |     | Protein | X-ray | 2008-02-19 |      |
|      |   |     |           |          |        |                                     |                     |                              |     | DNA     |       |            |      |
|      | D | 31  | 55926.58  | 9543.22  |        | Right end 31-mer                    | Dna-binding protein |                              |     | Protein | X-ray | 2008-02-19 |      |
|      |   |     |           |          |        |                                     |                     |                              |     | DNA     |       |            |      |
| 2VIC | A | 159 | 52901.54  | 18392.60 | 54.94  | Transposase orfa                    | Dna-binding protein | Manganese (ii) ion           | MN  | Protein | X-ray | 2008-02-19 |      |
|      |   |     |           |          |        |                                     |                     |                              |     | DNA     |       |            |      |

|      |   |     |          |          |                                                                                              |                                                                                              |                     |                    |         |         |            |            |
|------|---|-----|----------|----------|----------------------------------------------------------------------------------------------|----------------------------------------------------------------------------------------------|---------------------|--------------------|---------|---------|------------|------------|
|      | B | 159 | 52901.54 | 18392.60 | Transposase orfa                                                                             | Dna-binding protein                                                                          |                     |                    | Protein | X-ray   | 2008-02-19 |            |
|      |   |     |          |          |                                                                                              |                                                                                              |                     |                    | DNA     |         |            |            |
|      | C | 26  | 52901.54 | 8003.23  | 5'-<br>d(*ap*ap*ap*gp*cp*cp*cp*tp*ap<br>*gp*cp*tp*tp*tp*ap*gp*cp*tp*ap*t<br>p*gp*gp*gp*g)-3' | Dna-binding protein                                                                          |                     |                    | Protein | X-ray   | 2008-02-19 |            |
|      |   |     |          |          |                                                                                              |                                                                                              |                     |                    | DNA     |         |            |            |
|      | D | 26  | 52901.54 | 8003.23  | 54.94                                                                                        | 5'-<br>d(*ap*ap*ap*gp*cp*cp*cp*tp*ap<br>*gp*cp*tp*tp*tp*ap*gp*cp*tp*ap*t<br>p*gp*gp*gp*g)-3' | Dna-binding protein | Manganese (ii) ion | MN      | Protein | X-ray      | 2008-02-19 |
|      |   |     |          |          |                                                                                              |                                                                                              |                     |                    | DNA     |         |            |            |
| 2VII | A | 159 | 52791.66 | 18392.60 | Transposase orfa                                                                             | Dna-binding protein                                                                          |                     |                    | Protein | X-ray   | 2008-02-19 |            |
|      |   |     |          |          |                                                                                              |                                                                                              |                     |                    | DNA     |         |            |            |
|      | B | 159 | 52791.66 | 18392.60 | Transposase orfa                                                                             | Dna-binding protein                                                                          |                     |                    | Protein | X-ray   | 2008-02-19 |            |
|      |   |     |          |          |                                                                                              |                                                                                              |                     |                    | DNA     |         |            |            |
|      | C | 26  | 52791.66 | 8003.23  | 5'-<br>d(*ap*ap*ap*gp*cp*cp*cp*tp*ap<br>*gp*cp*tp*tp*tp*ap*gp*cp*tp*ap*t<br>p*gp*gp*gp*g)-3' | Dna-binding protein                                                                          |                     |                    | Protein | X-ray   | 2008-02-19 |            |
|      |   |     |          |          |                                                                                              |                                                                                              |                     |                    | DNA     |         |            |            |
|      | D | 26  | 52791.66 | 8003.23  | 5'-<br>d(*ap*ap*ap*gp*cp*cp*cp*tp*ap<br>*gp*cp*tp*tp*tp*ap*gp*cp*tp*ap*t<br>p*gp*gp*gp*g)-3' | Dna-binding protein                                                                          |                     |                    | Protein | X-ray   | 2008-02-19 |            |
|      |   |     |          |          |                                                                                              |                                                                                              |                     |                    | DNA     |         |            |            |
| 2VJU | A | 159 | 58556.01 | 18392.60 | 54.94                                                                                        | Transposase orfa                                                                             | Dna-binding protein | Manganese (ii) ion | MN      | Protein | X-ray      | 2008-02-19 |
|      |   |     |          |          |                                                                                              |                                                                                              |                     |                    | DNA     |         |            |            |
|      | B | 159 | 58556.01 | 18392.60 | Transposase orfa                                                                             | Dna-binding protein                                                                          |                     |                    | Protein | X-ray   | 2008-02-19 |            |
|      |   |     |          |          |                                                                                              |                                                                                              |                     |                    | DNA     |         |            |            |
|      | C | 35  | 58556.01 | 10803.00 | 54.94                                                                                        | Right end 35-mer                                                                             | Dna-binding protein | Manganese (ii) ion | MN      | Protein | X-ray      | 2008-02-19 |
|      |   |     |          |          |                                                                                              |                                                                                              |                     |                    | DNA     |         |            |            |
|      | D | 35  | 58556.01 | 10803.00 | 54.94                                                                                        | Right end 35-mer                                                                             | Dna-binding protein | Manganese (ii) ion | MN      | Protein | X-ray      | 2008-02-19 |
|      |   |     |          |          |                                                                                              |                                                                                              |                     |                    | DNA     |         |            |            |
| 2VJV | A | 159 | 56431.03 | 18392.60 | Transposase orfa                                                                             | Dna-binding protein                                                                          |                     |                    | Protein | X-ray   | 2008-02-19 |            |

|             |     |          |           |          |                                                                                                           |                     |               |                                                                          |         |         |            |            |
|-------------|-----|----------|-----------|----------|-----------------------------------------------------------------------------------------------------------|---------------------|---------------|--------------------------------------------------------------------------|---------|---------|------------|------------|
|             |     |          |           |          |                                                                                                           |                     |               |                                                                          | DNA     |         |            |            |
| B           | 159 | 56431.03 | 18392.60  |          | Transposase orfa                                                                                          | Dna-binding protein |               |                                                                          | Protein | X-ray   | 2008-02-19 |            |
|             |     |          |           |          |                                                                                                           |                     |               |                                                                          | DNA     |         |            |            |
| C           | 26  | 56431.03 | 8003.23   | 24.31    | 5'-<br>d(*da*da*da*dg*dc*dc*dc*dc*dt*da*<br>dg*dc*ctp*dt<br>*dt*dt*da*dg*dc*dt*da*dt*dg*dg*dg*<br>dgp)-3' | Dna-binding protein | Magnesium ion | MG                                                                       | Protein | X-ray   | 2008-02-19 |            |
|             |     |          |           |          |                                                                                                           |                     |               |                                                                          | DNA     |         |            |            |
| D           | 26  | 56431.03 | 8003.23   | 24.31    | 5'-<br>d(*da*da*da*dg*dc*dc*dc*dc*dt*da*<br>dg*dc*ctp*dt<br>*dt*dt*da*dg*dc*dt*da*dt*dg*dg*dg*<br>dgp)-3' | Dna-binding protein | Magnesium ion | MG                                                                       | Protein | X-ray   | 2008-02-19 |            |
|             |     |          |           |          |                                                                                                           |                     |               |                                                                          | DNA     |         |            |            |
| E           | 6   | 56431.03 | 1783.23   | 24.31    | 5'-d(*dt*da*dt*dt*da*dcp)-3'                                                                              | Dna-binding protein | Magnesium ion | MG                                                                       | Protein | X-ray   | 2008-02-19 |            |
|             |     |          |           |          |                                                                                                           |                     |               |                                                                          | DNA     |         |            |            |
| F           | 6   | 56431.03 | 1783.23   |          | 5'-d(*dt*da*dt*dt*da*dcp)-3'                                                                              | Dna-binding protein |               |                                                                          | Protein | X-ray   | 2008-02-19 |            |
|             |     |          |           |          |                                                                                                           |                     |               |                                                                          | DNA     |         |            |            |
| <b>2VW9</b> | A   | 134      | 40539.90  | 14969.00 | SINGLE-strandedprotein                                                                                    | Dna-binding protein |               |                                                                          | Protein | X-ray   | 2009-06-02 |            |
|             |     |          |           |          |                                                                                                           |                     |               |                                                                          | DNA     |         |            |            |
|             | B   | 134      | 40539.90  | 14969.00 | SINGLE-strandedprotein                                                                                    | Dna-binding protein |               |                                                                          | Protein | X-ray   | 2009-06-02 |            |
|             |     |          |           |          |                                                                                                           |                     |               |                                                                          | DNA     |         |            |            |
|             | C   | 35       | 40539.90  | 10601.90 | Poly-dt                                                                                                   | Dna-binding protein |               |                                                                          | Protein | X-ray   | 2009-06-02 |            |
|             |     |          |           |          |                                                                                                           |                     |               |                                                                          | DNA     |         |            |            |
| <b>2W4I</b> | A   | 255      | 115465.07 | 28532.40 | 147.13                                                                                                    | Glutamate racemase  | Isomerase     | D-glutamic acid                                                          | DGL     | Protein | X-ray      | 2008-12-09 |
|             | B   | 255      | 115465.07 | 28532.40 | 147.13                                                                                                    | Glutamate racemase  | Isomerase     | D-glutamic acid                                                          | DGL     | Protein | X-ray      | 2008-12-09 |
|             | B   | 255      | 115465.07 | 28532.40 | 373.47                                                                                                    | Glutamate racemase  | Isomerase     | 1-[(3s)-5-phenyl-3-thiophen-2-yl-3h-1,4-benzodiazepin-2-yl]azetidin-3-ol | VGA     | Protein | X-ray      | 2008-12-09 |
|             | E   | 255      | 115465.07 | 28532.40 | 147.13                                                                                                    | Glutamate racemase  | Isomerase     | D-glutamic acid                                                          | DGL     | Protein | X-ray      | 2008-12-09 |
|             | E   | 255      | 115465.07 | 28532.40 | 373.47                                                                                                    | Glutamate racemase  | Isomerase     | 1-[(3s)-5-phenyl-3-thiophen-2-yl-3h-1,4-benzodiazepin-2-yl]azetidin-3-ol | VGA     | Protein | X-ray      | 2008-12-09 |
|             | F   | 255      | 115465.07 | 28532.40 | 147.13                                                                                                    | Glutamate racemase  | Isomerase     | D-glutamic acid                                                          | DGL     | Protein | X-ray      | 2008-12-09 |

|             |   |     |           |          |        |                              |                    |                                                                                                        |     |         |       |            |
|-------------|---|-----|-----------|----------|--------|------------------------------|--------------------|--------------------------------------------------------------------------------------------------------|-----|---------|-------|------------|
| <b>2W5U</b> | A | 164 | 36291.90  | 17540.50 | 456.35 | Flavodoxin                   | Electron transport | Flavin mononucleotide                                                                                  | FMN | Protein | X-ray | 2009-12-22 |
|             | A | 164 | 36291.90  | 17540.50 | 298.20 | Flavodoxin                   | Electron transport | [2-(5-amino-4-cyano-1h-pyrazol-1-yl)-5-(trifluoromethyl)phenyl](hydroxy)oxoammonium                    | IC3 | Protein | X-ray | 2009-12-22 |
|             | B | 164 | 36291.90  | 17540.50 | 456.35 | Flavodoxin                   | Electron transport | Flavin mononucleotide                                                                                  | FMN | Protein | X-ray | 2009-12-22 |
| <b>2WCQ</b> | A | 159 | 36846.45  | 18231.10 | 192.12 | TNF-alpha protein            | Immune system      | Citric acid                                                                                            | CIT | Protein | X-ray | 2009-05-12 |
|             | B | 159 | 36846.45  | 18231.10 | 192.12 | TNF-alpha protein            | Immune system      | Citric acid                                                                                            | CIT | Protein | X-ray | 2009-05-12 |
| <b>2WCR</b> | A | 159 | 36589.99  | 18231.10 | 69.09  | TNF-alpha protein            | Immune system      | Imidazole                                                                                              | IMD | Protein | X-ray | 2009-05-12 |
|             | A | 159 | 36589.99  | 18231.10 | 58.70  | TNF-alpha protein            | Immune system      | Nickel (ii) ion                                                                                        | NI  | Protein | X-ray | 2009-05-12 |
|             | B | 159 | 36589.99  | 18231.10 |        | TNF-alpha protein            | Immune system      |                                                                                                        |     | Protein | X-ray | 2009-05-12 |
| <b>2WGL</b> | A | 254 | 87363.00  | 29121.00 | 196.11 | Urease protein UREF          | Metal protein      | Selenomethionine                                                                                       | MSE | Protein | X-ray | 2009-05-26 |
|             | B | 254 | 87363.00  | 29121.00 | 196.11 | Urease protein UREF          | Metal protein      | Selenomethionine                                                                                       | MSE | Protein | X-ray | 2009-05-26 |
|             | C | 254 | 87363.00  | 29121.00 | 196.11 | Urease protein UREF          | Metal protein      | Selenomethionine                                                                                       | MSE | Protein | X-ray | 2009-05-26 |
| <b>2WKS</b> | A | 167 | 113098.72 | 18499.40 | 350.39 | 3-dehydroquinase dehydratase | Lyase              | (1r,4s,5r)-1,4,5-trihydroxy-3-[(5-methyl-1-benzothiophen-2-yl)methoxy]cyclohex-2-ene-1-carboxylic acid | CB6 | Protein | X-ray | 2009-11-24 |
|             | B | 167 | 113098.72 | 18499.40 | 350.39 | 3-dehydroquinase dehydratase | Lyase              | (1r,4s,5r)-1,4,5-trihydroxy-3-[(5-methyl-1-benzothiophen-2-yl)methoxy]cyclohex-2-ene-1-carboxylic acid | CB6 | Protein | X-ray | 2009-11-24 |
|             | C | 167 | 113098.72 | 18499.40 | 350.39 | 3-dehydroquinase dehydratase | Lyase              | (1r,4s,5r)-1,4,5-trihydroxy-3-[(5-methyl-1-benzothiophen-2-yl)methoxy]cyclohex-2-ene-1-carboxylic acid | CB6 | Protein | X-ray | 2009-11-24 |
|             | D | 167 | 113098.72 | 18499.40 | 350.39 | 3-dehydroquinase dehydratase | Lyase              | (1r,4s,5r)-1,4,5-trihydroxy-3-[(5-methyl-1-benzothiophen-2-yl)methoxy]cyclohex-2-ene-1-carboxylic acid | CB6 | Protein | X-ray | 2009-11-24 |
|             | E | 167 | 113098.72 | 18499.40 | 350.39 | 3-dehydroquinase dehydratase | Lyase              | (1r,4s,5r)-1,4,5-trihydroxy-3-[(5-methyl-1-benzothiophen-2-yl)methoxy]cyclohex-2-ene-1-carboxylic acid | CB6 | Protein | X-ray | 2009-11-24 |

|      |   |     |           |          |        |                                      |               |                                                                                                        |     |         |       |            |
|------|---|-----|-----------|----------|--------|--------------------------------------|---------------|--------------------------------------------------------------------------------------------------------|-----|---------|-------|------------|
|      |   |     |           |          |        |                                      |               | methyl-1-benzothiophen-2-yl)methoxy]cyclohex-2-ene-1-carboxylic acid                                   |     |         |       |            |
|      | F | 167 | 113098.72 | 18499.40 | 350.39 | 3-dehydroquinatase                   | Lyase         | (1r,4s,5r)-1,4,5-trihydroxy-3-[(5-methyl-1-benzothiophen-2-yl)methoxy]cyclohex-2-ene-1-carboxylic acid | CB6 | Protein | X-ray | 2009-11-24 |
|      |   |     |           |          |        |                                      |               |                                                                                                        |     |         |       |            |
| 2WLT | A | 332 | 35740.80  | 35607.70 |        | L-asparaginase                       | Hydrolase     |                                                                                                        |     | Protein | X-ray | 2009-11-24 |
| 2WP0 | A | 180 | 68052.84  | 21039.40 | 35.45  | Hoba                                 | Dnaprotein    | Chloride ion                                                                                           | CL  | Protein | X-ray | 2009-11-17 |
|      | A | 180 | 68052.84  | 21039.40 | 92.09  | Hoba                                 | Dnaprotein    | Glycerol                                                                                               | GOL | Protein | X-ray | 2009-11-17 |
|      | A | 180 | 68052.84  | 21039.40 | 22.99  | Hoba                                 | Dnaprotein    | Sodium ion                                                                                             | NA  | Protein | X-ray | 2009-11-17 |
|      | B | 180 | 68052.84  | 21039.40 | 35.45  | Hoba                                 | Dnaprotein    | Chloride ion                                                                                           | CL  | Protein | X-ray | 2009-11-17 |
|      | B | 180 | 68052.84  | 21039.40 | 92.09  | Hoba                                 | Dnaprotein    | Glycerol                                                                                               | GOL | Protein | X-ray | 2009-11-17 |
|      | B | 180 | 68052.84  | 21039.40 | 22.99  | Hoba                                 | Dnaprotein    | Sodium ion                                                                                             | NA  | Protein | X-ray | 2009-11-17 |
|      | C | 112 | 68052.84  | 12632.60 |        | Chromosomalprotein DNAA              | Dnaprotein    |                                                                                                        |     | Protein | X-ray | 2009-11-17 |
|      | D | 112 | 68052.84  | 12632.60 |        | Chromosomalprotein DNAA              | Dnaprotein    |                                                                                                        |     | Protein | X-ray | 2009-11-17 |
| 2WT4 | A | 332 | 35740.80  | 35607.70 |        | L-asparaginase                       | Hydrolase     |                                                                                                        |     | Protein | X-ray | 2009-11-24 |
| 2WVB | A | 148 | 34270.61  | 17020.20 | 46.03  | Putative nickel-responsive regulator | Transcription | Formic acid                                                                                            | FMT | Protein | X-ray | 2010-01-19 |
|      | A | 148 | 34270.61  | 17020.20 | 92.09  | Putative nickel-responsive regulator | Transcription | Glycerol                                                                                               | GOL | Protein | X-ray | 2010-01-19 |
|      | B | 148 | 34270.61  | 17020.20 |        | Putative nickel-responsive regulator | Transcription |                                                                                                        |     | Protein | X-ray | 2010-01-19 |
| 2WVC | A | 148 | 34999.18  | 17008.20 | 92.09  | Putative nickel-responsive regulator | Transcription | Glycerol                                                                                               | GOL | Protein | X-ray | 2010-01-19 |
|      | A | 148 | 34999.18  | 17008.20 | 96.06  | Putative nickel-responsive regulator | Transcription | Sulfate ion                                                                                            | SO4 | Protein | X-ray | 2010-01-19 |
|      | B | 148 | 34999.18  | 17008.20 | 46.03  | Putative nickel-responsive regulator | Transcription | Formic acid                                                                                            | FMT | Protein | X-ray | 2010-01-19 |
|      | B | 148 | 34999.18  | 17008.20 | 92.09  | Putative nickel-responsive regulator | Transcription | Glycerol                                                                                               | GOL | Protein | X-ray | 2010-01-19 |
|      | B | 148 | 34999.18  | 17008.20 | 96.06  | Putative nickel-responsive regulator | Transcription | Sulfate ion                                                                                            | SO4 | Protein | X-ray | 2010-01-19 |
| 2WVD | A | 148 | 69746.12  | 17154.30 | 92.09  | Putative nickel-responsive regulator | Transcription | Glycerol                                                                                               | GOL | Protein | X-ray | 2010-01-19 |
|      | A | 148 | 69746.12  | 17154.30 | 96.06  | Putative nickel-responsive regulator | Transcription | Sulfate ion                                                                                            | SO4 | Protein | X-ray | 2010-01-19 |
|      | B | 148 | 69746.12  | 17154.30 | 92.09  | Putative nickel-responsive regulator | Transcription | Glycerol                                                                                               | GOL | Protein | X-ray | 2010-01-19 |
|      | B | 148 | 69746.12  | 17154.30 | 96.06  | Putative nickel-responsive regulator | Transcription | Sulfate ion                                                                                            | SO4 | Protein | X-ray | 2010-01-19 |
|      | C | 148 | 69746.12  | 17154.30 | 92.09  | Putative nickel-responsive regulator | Transcription | Glycerol                                                                                               | GOL | Protein | X-ray | 2010-01-19 |
|      | C | 148 | 69746.12  | 17154.30 | 96.06  | Putative nickel-responsive regulator | Transcription | Sulfate ion                                                                                            | SO4 | Protein | X-ray | 2010-01-19 |

|      |   |     |          |          |        |                                      |               |                                                                                                           |     |         |       |            |
|------|---|-----|----------|----------|--------|--------------------------------------|---------------|-----------------------------------------------------------------------------------------------------------|-----|---------|-------|------------|
| 2WVE | D | 148 | 69746.12 | 17154.30 | 92.09  | Putative nickel-responsive regulator | Transcription | Glycerol                                                                                                  | GOL | Protein | X-ray | 2010-01-19 |
|      | D | 148 | 69746.12 | 17154.30 | 96.06  | Putative nickel-responsive regulator | Transcription | Sulfate ion                                                                                               | SO4 | Protein | X-ray | 2010-01-19 |
|      | A | 148 | 35449.64 | 17189.40 | 192.12 | Putative nickel-responsive regulator | Transcription | Citric acid                                                                                               | CIT | Protein | X-ray | 2010-01-19 |
|      | A | 148 | 35449.64 | 17189.40 | 92.09  | Putative nickel-responsive regulator | Transcription | Glycerol                                                                                                  | GOL | Protein | X-ray | 2010-01-19 |
|      | A | 148 | 35449.64 | 17189.40 | 96.06  | Putative nickel-responsive regulator | Transcription | Sulfate ion                                                                                               | SO4 | Protein | X-ray | 2010-01-19 |
|      | A | 148 | 35449.64 | 17189.40 | 122.14 | Putative nickel-responsive regulator | Transcription | 2-amino-2-hydroxymethyl-propane-1,3-diol                                                                  | TRS | Protein | X-ray | 2010-01-19 |
| 2WVF | B | 148 | 35449.64 | 17189.40 | 92.09  | Putative nickel-responsive regulator | Transcription | Glycerol                                                                                                  | GOL | Protein | X-ray | 2010-01-19 |
|      | B | 148 | 35449.64 | 17189.40 | 96.06  | Putative nickel-responsive regulator | Transcription | Sulfate ion                                                                                               | SO4 | Protein | X-ray | 2010-01-19 |
|      | A | 148 | 35016.47 | 17008.20 | 46.03  | Putative nickel-responsive regulator | Transcription | Formic acid                                                                                               | FMT | Protein | X-ray | 2010-01-19 |
|      | A | 148 | 35016.47 | 17008.20 | 92.09  | Putative nickel-responsive regulator | Transcription | Glycerol                                                                                                  | GOL | Protein | X-ray | 2010-01-19 |
|      | A | 148 | 35016.47 | 17008.20 | 58.70  | Putative nickel-responsive regulator | Transcription | Nickel (ii) ion                                                                                           | NI  | Protein | X-ray | 2010-01-19 |
|      | A | 148 | 35016.47 | 17008.20 | 96.06  | Putative nickel-responsive regulator | Transcription | Sulfate ion                                                                                               | SO4 | Protein | X-ray | 2010-01-19 |
| 2XB9 | B | 148 | 35016.47 | 17008.20 | 46.03  | Putative nickel-responsive regulator | Transcription | Formic acid                                                                                               | FMT | Protein | X-ray | 2010-01-19 |
|      | B | 148 | 35016.47 | 17008.20 | 92.09  | Putative nickel-responsive regulator | Transcription | Glycerol                                                                                                  | GOL | Protein | X-ray | 2010-01-19 |
|      | B | 148 | 35016.47 | 17008.20 | 58.70  | Putative nickel-responsive regulator | Transcription | Nickel (ii) ion                                                                                           | NI  | Protein | X-ray | 2010-01-19 |
|      | A | 167 | 56310.93 | 18499.40 | 310.30 | 3-dehydroquinatase                   | Lyase         | (1r,2r,4s,5r)-1,4,5-trihydroxy-2-(4-methoxybenzyl)-3-oxocyclohexanecarboxylic acid                        | XNW | Protein | X-ray | 2010-09-15 |
|      | B | 167 | 56310.93 | 18499.40 | 310.30 | 3-dehydroquinatase                   | Lyase         | (1r,2r,4s,5r)-1,4,5-trihydroxy-2-(4-methoxybenzyl)-3-oxocyclohexanecarboxylic acid                        | XNW | Protein | X-ray | 2010-09-15 |
|      | C | 167 | 56310.93 | 18499.40 | 192.12 | 3-dehydroquinatase                   | Lyase         | Citric acid                                                                                               | CIT | Protein | X-ray | 2010-09-15 |
| 2XD9 | A | 167 | 56309.10 | 18499.40 | 270.30 | 3-dehydroquinatase                   | Lyase         | (4r,6r,7s)-4,6,7-trihydroxy-2-[(1e)-prop-1-en-1-yl]-4,5,6,7-tetrahydro-1-benzothiophene-4-carboxylic acid | XD9 | Protein | X-ray | 2010-11-24 |
|      | B | 167 | 56309.10 | 18499.40 | 270.30 | 3-dehydroquinatase                   | Lyase         | (4r,6r,7s)-4,6,7-trihydroxy-2-[(1e)-prop-1-en-1-yl]-4,5,6,7-tetrahydro-1-benzothiophene-4-carboxylic acid | XD9 | Protein | X-ray | 2010-11-24 |
|      | C | 167 | 56309.10 | 18499.40 | 270.30 | 3-dehydroquinatase                   | Lyase         | (4r,6r,7s)-4,6,7-trihydroxy-2-[(1e)-prop-1-en-1-yl]-4,5,6,7-tetrahydro-1-                                 | XD9 | Protein | X-ray | 2010-11-24 |

|             |   |     |           |          |        |                                                |                  |                                                                                                          |     |         |       |            |
|-------------|---|-----|-----------|----------|--------|------------------------------------------------|------------------|----------------------------------------------------------------------------------------------------------|-----|---------|-------|------------|
| <b>2XDA</b> | A | 167 | 18797.75  | 18499.40 | 298.35 | 3-dehydroquinatase                             | Lyase            | benzothiophene-4-carboxylic acid                                                                         | JPS | Protein | X-ray | 2010-11-24 |
|             |   |     |           |          |        |                                                |                  | (4r,6r,7s)-2-(2-cyclopropylethyl)-4,6,7-trihydroxy-4,5,6,7-tetrahydro-1-benzothiophene-4-carboxylic acid |     |         |       |            |
| <b>2XIG</b> | A | 150 | 71706.68  | 17682.50 | 65.38  | Ferricprotein                                  | Transcription    | Zinc ion                                                                                                 | ZN  | Protein | X-ray | 2011-01-19 |
|             | B | 150 | 71706.68  | 17682.50 | 192.12 | Ferricprotein                                  | Transcription    | Citric acid                                                                                              | CIT | Protein | X-ray | 2011-01-19 |
|             | B | 150 | 71706.68  | 17682.50 | 65.38  | Ferricprotein                                  | Transcription    | Zinc ion                                                                                                 | ZN  | Protein | X-ray | 2011-01-19 |
|             | C | 150 | 71706.68  | 17682.50 | 65.38  | Ferricprotein                                  | Transcription    | Zinc ion                                                                                                 | ZN  | Protein | X-ray | 2011-01-19 |
|             | D | 150 | 71706.68  | 17682.50 | 65.38  | Ferricprotein                                  | Transcription    | Zinc ion                                                                                                 | ZN  | Protein | X-ray | 2011-01-19 |
| <b>2XRH</b> | A | 100 | 11635.31  | 11512.20 | 123.11 | Protein hp0721                                 | Unknown function | Nicotinic acid                                                                                           | NIO | Protein | X-ray | 2011-09-28 |
| <b>2Y3Y</b> | A | 91  | 43569.14  | 10428.90 | 58.70  | Putative nickel-responsive regulator           | Transcription    | Nickel (ii) ion                                                                                          | NI  | Protein | X-ray | 2011-08-17 |
|             | B | 91  | 43569.14  | 10428.90 | 238.30 | Putative nickel-responsive regulator           | Transcription    | 4-(2-hydroxyethyl)-1-piperazine ethanesulfonic acid                                                      | EPE | Protein | X-ray | 2011-08-17 |
|             | B | 91  | 43569.14  | 10428.90 | 58.70  | Putative nickel-responsive regulator           | Transcription    | Nickel (ii) ion                                                                                          | NI  | Protein | X-ray | 2011-08-17 |
|             | C | 91  | 43569.14  | 10428.90 | 238.30 | Putative nickel-responsive regulator           | Transcription    | 4-(2-hydroxyethyl)-1-piperazine ethanesulfonic acid                                                      | EPE | Protein | X-ray | 2011-08-17 |
|             | C | 91  | 43569.14  | 10428.90 | 58.70  | Putative nickel-responsive regulator           | Transcription    | Nickel (ii) ion                                                                                          | NI  | Protein | X-ray | 2011-08-17 |
|             | C | 91  | 43569.14  | 10428.90 | 106.12 | Putative nickel-responsive regulator           | Transcription    | Di(hydroxyethyl)ether                                                                                    | PEG | Protein | X-ray | 2011-08-17 |
|             | D | 91  | 43569.14  | 10428.90 | 58.70  | Putative nickel-responsive regulator           | Transcription    | Nickel (ii) ion                                                                                          | NI  | Protein | X-ray | 2011-08-17 |
|             | Q | 11  | 43569.14  | 823.77   |        | Undecapeptide-gsssgsagag                       | Transcription    |                                                                                                          |     | Protein | X-ray | 2011-08-17 |
|             | A | 196 | 301669.22 | 21547.80 |        | ATP-dependent Clp protease proteolytic subunit | Hydrolase        |                                                                                                          |     | Protein | X-ray | 2008-04-22 |
|             | B | 196 | 301669.22 | 21547.80 |        | ATP-dependent Clp protease proteolytic subunit | Hydrolase        |                                                                                                          |     | Protein | X-ray | 2008-04-22 |
| <b>2ZL0</b> | C | 196 | 301669.22 | 21547.80 |        | ATP-dependent Clp protease proteolytic subunit | Hydrolase        |                                                                                                          |     | Protein | X-ray | 2008-04-22 |
|             | D | 196 | 301669.22 | 21547.80 |        | ATP-dependent Clp protease proteolytic subunit | Hydrolase        |                                                                                                          |     | Protein | X-ray | 2008-04-22 |
|             | E | 196 | 301669.22 | 21547.80 |        | ATP-dependent Clp protease proteolytic subunit | Hydrolase        |                                                                                                          |     | Protein | X-ray | 2008-04-22 |
|             | F | 196 | 301669.22 | 21547.80 |        | ATP-dependent Clp protease                     | Hydrolase        |                                                                                                          |     | Protein | X-ray | 2008-04-22 |

|            |     |           |           |          |                            |           |  |         |       |            |
|------------|-----|-----------|-----------|----------|----------------------------|-----------|--|---------|-------|------------|
|            |     |           |           |          | proteolytic subunit        |           |  |         |       |            |
| G          | 196 | 301669.22 | 21547.80  |          | ATP-dependent Clp protease | Hydrolase |  | Protein | X-ray | 2008-04-22 |
|            |     |           |           |          | proteolytic subunit        |           |  |         |       |            |
| H          | 196 | 301669.22 | 21547.80  |          | ATP-dependent Clp protease | Hydrolase |  | Protein | X-ray | 2008-04-22 |
|            |     |           |           |          | proteolytic subunit        |           |  |         |       |            |
| I          | 196 | 301669.22 | 21547.80  |          | ATP-dependent Clp protease | Hydrolase |  | Protein | X-ray | 2008-04-22 |
|            |     |           |           |          | proteolytic subunit        |           |  |         |       |            |
| J          | 196 | 301669.22 | 21547.80  |          | ATP-dependent Clp protease | Hydrolase |  | Protein | X-ray | 2008-04-22 |
|            |     |           |           |          | proteolytic subunit        |           |  |         |       |            |
| K          | 196 | 301669.22 | 21547.80  |          | ATP-dependent Clp protease | Hydrolase |  | Protein | X-ray | 2008-04-22 |
|            |     |           |           |          | proteolytic subunit        |           |  |         |       |            |
| L          | 196 | 301669.22 | 21547.80  |          | ATP-dependent Clp protease | Hydrolase |  | Protein | X-ray | 2008-04-22 |
|            |     |           |           |          | proteolytic subunit        |           |  |         |       |            |
| M          | 196 | 301669.22 | 21547.80  |          | ATP-dependent Clp protease | Hydrolase |  | Protein | X-ray | 2008-04-22 |
|            |     |           |           |          | proteolytic subunit        |           |  |         |       |            |
| N          | 196 | 301669.22 | 21547.80  |          | ATP-dependent Clp protease | Hydrolase |  | Protein | X-ray | 2008-04-22 |
|            |     |           |           |          | proteolytic subunit        |           |  |         |       |            |
| <b>ZL2</b> | A   | 196       | 309119.72 | 21547.80 | ATP-dependent Clp protease | Hydrolase |  | Protein | X-ray | 2008-04-22 |
|            |     |           |           |          | proteolytic subunit        |           |  |         |       |            |
| B          | 196 | 309119.72 | 21547.80  |          | ATP-dependent Clp protease | Hydrolase |  | Protein | X-ray | 2008-04-22 |
|            |     |           |           |          | proteolytic subunit        |           |  |         |       |            |
| C          | 196 | 309119.72 | 21547.80  |          | ATP-dependent Clp protease | Hydrolase |  | Protein | X-ray | 2008-04-22 |
|            |     |           |           |          | proteolytic subunit        |           |  |         |       |            |
| D          | 196 | 309119.72 | 21547.80  |          | ATP-dependent Clp protease | Hydrolase |  | Protein | X-ray | 2008-04-22 |
|            |     |           |           |          | proteolytic subunit        |           |  |         |       |            |
| E          | 196 | 309119.72 | 21547.80  |          | ATP-dependent Clp protease | Hydrolase |  | Protein | X-ray | 2008-04-22 |
|            |     |           |           |          | proteolytic subunit        |           |  |         |       |            |
| F          | 196 | 309119.72 | 21547.80  |          | ATP-dependent Clp protease | Hydrolase |  | Protein | X-ray | 2008-04-22 |
|            |     |           |           |          | proteolytic subunit        |           |  |         |       |            |
| G          | 196 | 309119.72 | 21547.80  |          | ATP-dependent Clp protease | Hydrolase |  | Protein | X-ray | 2008-04-22 |
|            |     |           |           |          | proteolytic subunit        |           |  |         |       |            |

|             |   |     |           |          |        |                                                   |           |         |         |         |                  |
|-------------|---|-----|-----------|----------|--------|---------------------------------------------------|-----------|---------|---------|---------|------------------|
|             | H | 196 | 309119.72 | 21547.80 |        | ATP-dependent Clp protease<br>proteolytic subunit | Hydrolase |         | Protein | X-ray   | 2008-04-22       |
|             | I | 196 | 309119.72 | 21547.80 |        | ATP-dependent Clp protease<br>proteolytic subunit | Hydrolase |         | Protein | X-ray   | 2008-04-22       |
|             | J | 196 | 309119.72 | 21547.80 |        | ATP-dependent Clp protease<br>proteolytic subunit | Hydrolase |         | Protein | X-ray   | 2008-04-22       |
|             | K | 196 | 309119.72 | 21547.80 |        | ATP-dependent Clp protease<br>proteolytic subunit | Hydrolase |         | Protein | X-ray   | 2008-04-22       |
|             | L | 196 | 309119.72 | 21547.80 |        | ATP-dependent Clp protease<br>proteolytic subunit | Hydrolase |         | Protein | X-ray   | 2008-04-22       |
|             | M | 196 | 309119.72 | 21547.80 |        | ATP-dependent Clp protease<br>proteolytic subunit | Hydrolase |         | Protein | X-ray   | 2008-04-22       |
|             | N | 196 | 309119.72 | 21547.80 |        | ATP-dependent Clp protease<br>proteolytic subunit | Hydrolase |         | Protein | X-ray   | 2008-04-22       |
|             | O | 7   | 309119.72 | 777.87   |        | A peptide substrate-NVLGFTQ                       | Hydrolase |         | Protein | X-ray   | 2008-04-22       |
|             | P | 7   | 309119.72 | 777.87   |        | A peptide substrate-NVLGFTQ                       | Hydrolase |         | Protein | X-ray   | 2008-04-22       |
|             | Q | 7   | 309119.72 | 777.87   |        | A peptide substrate-NVLGFTQ                       | Hydrolase |         | Protein | X-ray   | 2008-04-22       |
|             | R | 7   | 309119.72 | 613.75   | 103.12 | A peptide substrate-NVLGFTQ for<br>Chain R and S  | Hydrolase | Unknown | UNK     | Protein | X-ray 2008-04-22 |
|             | S | 7   | 309119.72 | 613.75   | 103.12 | A peptide substrate-NVLGFTQ for<br>Chain R and S  | Hydrolase | Unknown | UNK     | Protein | X-ray 2008-04-22 |
|             | T | 7   | 309119.72 | 777.87   |        | A peptide substrate-NVLGFTQ                       | Hydrolase |         | Protein | X-ray   | 2008-04-22       |
|             | U | 7   | 309119.72 | 777.87   |        | A peptide substrate-NVLGFTQ                       | Hydrolase |         | Protein | X-ray   | 2008-04-22       |
|             | V | 7   | 309119.72 | 777.87   |        | A peptide substrate-NVLGFTQ                       | Hydrolase |         | Protein | X-ray   | 2008-04-22       |
|             | W | 7   | 309119.72 | 777.87   |        | A peptide substrate-NVLGFTQ                       | Hydrolase |         | Protein | X-ray   | 2008-04-22       |
|             | X | 7   | 309119.72 | 777.87   |        | A peptide substrate-NVLGFTQ                       | Hydrolase |         | Protein | X-ray   | 2008-04-22       |
| <b>2ZL3</b> | A | 196 | 301445.22 | 21531.80 |        | ATP-dependent Clp protease<br>proteolytic subunit | Hydrolase |         | Protein | X-ray   | 2008-04-22       |
|             | B | 196 | 301445.22 | 21531.80 |        | ATP-dependent Clp protease<br>proteolytic subunit | Hydrolase |         | Protein | X-ray   | 2008-04-22       |
|             | C | 196 | 301445.22 | 21531.80 |        | ATP-dependent Clp protease                        | Hydrolase |         | Protein | X-ray   | 2008-04-22       |

|             |     |           |           |          |                            |           |         |       |            |
|-------------|-----|-----------|-----------|----------|----------------------------|-----------|---------|-------|------------|
|             |     |           |           |          | proteolytic subunit        |           |         |       |            |
| D           | 196 | 301445.22 | 21531.80  |          | ATP-dependent Clp protease | Hydrolase | Protein | X-ray | 2008-04-22 |
|             |     |           |           |          | proteolytic subunit        |           |         |       |            |
| E           | 196 | 301445.22 | 21531.80  |          | ATP-dependent Clp protease | Hydrolase | Protein | X-ray | 2008-04-22 |
|             |     |           |           |          | proteolytic subunit        |           |         |       |            |
| F           | 196 | 301445.22 | 21531.80  |          | ATP-dependent Clp protease | Hydrolase | Protein | X-ray | 2008-04-22 |
|             |     |           |           |          | proteolytic subunit        |           |         |       |            |
| G           | 196 | 301445.22 | 21531.80  |          | ATP-dependent Clp protease | Hydrolase | Protein | X-ray | 2008-04-22 |
|             |     |           |           |          | proteolytic subunit        |           |         |       |            |
| H           | 196 | 301445.22 | 21531.80  |          | ATP-dependent Clp protease | Hydrolase | Protein | X-ray | 2008-04-22 |
|             |     |           |           |          | proteolytic subunit        |           |         |       |            |
| I           | 196 | 301445.22 | 21531.80  |          | ATP-dependent Clp protease | Hydrolase | Protein | X-ray | 2008-04-22 |
|             |     |           |           |          | proteolytic subunit        |           |         |       |            |
| J           | 196 | 301445.22 | 21531.80  |          | ATP-dependent Clp protease | Hydrolase | Protein | X-ray | 2008-04-22 |
|             |     |           |           |          | proteolytic subunit        |           |         |       |            |
| K           | 196 | 301445.22 | 21531.80  |          | ATP-dependent Clp protease | Hydrolase | Protein | X-ray | 2008-04-22 |
|             |     |           |           |          | proteolytic subunit        |           |         |       |            |
| L           | 196 | 301445.22 | 21531.80  |          | ATP-dependent Clp protease | Hydrolase | Protein | X-ray | 2008-04-22 |
|             |     |           |           |          | proteolytic subunit        |           |         |       |            |
| M           | 196 | 301445.22 | 21531.80  |          | ATP-dependent Clp protease | Hydrolase | Protein | X-ray | 2008-04-22 |
|             |     |           |           |          | proteolytic subunit        |           |         |       |            |
| N           | 196 | 301445.22 | 21531.80  |          | ATP-dependent Clp protease | Hydrolase | Protein | X-ray | 2008-04-22 |
|             |     |           |           |          | proteolytic subunit        |           |         |       |            |
| <b>2ZL4</b> | 1   | 4         | 305677.84 | 302.33   | Peptide substrate AAAA     | Hydrolase | Protein | X-ray | 2008-04-22 |
| <b>2ZL4</b> | 2   | 4         | 305677.84 | 302.33   | Peptide substrate AAAA     | Hydrolase | Protein | X-ray | 2008-04-22 |
| <b>2ZL4</b> | A   | 196       | 305677.84 | 21531.80 | ATP-dependent Clp protease | Hydrolase | Protein | X-ray | 2008-04-22 |
|             |     |           |           |          | proteolytic subunit        |           |         |       |            |
| B           | 196 | 305677.84 | 21531.80  |          | ATP-dependent Clp protease | Hydrolase | Protein | X-ray | 2008-04-22 |
|             |     |           |           |          | proteolytic subunit        |           |         |       |            |
| C           | 196 | 305677.84 | 21531.80  |          | ATP-dependent Clp protease | Hydrolase | Protein | X-ray | 2008-04-22 |
|             |     |           |           |          | proteolytic subunit        |           |         |       |            |

|   |     |           |          |                                                   |           |         |       |            |
|---|-----|-----------|----------|---------------------------------------------------|-----------|---------|-------|------------|
| D | 196 | 305677.84 | 21531.80 | ATP-dependent Clp protease<br>proteolytic subunit | Hydrolase | Protein | X-ray | 2008-04-22 |
| E | 196 | 305677.84 | 21531.80 | ATP-dependent Clp protease<br>proteolytic subunit | Hydrolase | Protein | X-ray | 2008-04-22 |
| F | 196 | 305677.84 | 21531.80 | ATP-dependent Clp protease<br>proteolytic subunit | Hydrolase | Protein | X-ray | 2008-04-22 |
| G | 196 | 305677.84 | 21531.80 | ATP-dependent Clp protease<br>proteolytic subunit | Hydrolase | Protein | X-ray | 2008-04-22 |
| H | 196 | 305677.84 | 21531.80 | ATP-dependent Clp protease<br>proteolytic subunit | Hydrolase | Protein | X-ray | 2008-04-22 |
| I | 196 | 305677.84 | 21531.80 | ATP-dependent Clp protease<br>proteolytic subunit | Hydrolase | Protein | X-ray | 2008-04-22 |
| J | 196 | 305677.84 | 21531.80 | ATP-dependent Clp protease<br>proteolytic subunit | Hydrolase | Protein | X-ray | 2008-04-22 |
| K | 196 | 305677.84 | 21531.80 | ATP-dependent Clp protease<br>proteolytic subunit | Hydrolase | Protein | X-ray | 2008-04-22 |
| L | 196 | 305677.84 | 21531.80 | ATP-dependent Clp protease<br>proteolytic subunit | Hydrolase | Protein | X-ray | 2008-04-22 |
| M | 196 | 305677.84 | 21531.80 | ATP-dependent Clp protease<br>proteolytic subunit | Hydrolase | Protein | X-ray | 2008-04-22 |
| N | 196 | 305677.84 | 21531.80 | ATP-dependent Clp protease<br>proteolytic subunit | Hydrolase | Protein | X-ray | 2008-04-22 |
| O | 4   | 305677.84 | 302.33   | Peptide substrate AAAA                            | Hydrolase | Protein | X-ray | 2008-04-22 |
| P | 4   | 305677.84 | 302.33   | Peptide substrate AAAA                            | Hydrolase | Protein | X-ray | 2008-04-22 |
| Q | 4   | 305677.84 | 302.33   | Peptide substrate AAAA                            | Hydrolase | Protein | X-ray | 2008-04-22 |
| R | 4   | 305677.84 | 302.33   | Peptide substrate AAAA                            | Hydrolase | Protein | X-ray | 2008-04-22 |
| S | 4   | 305677.84 | 302.33   | Peptide substrate AAAA                            | Hydrolase | Protein | X-ray | 2008-04-22 |
| T | 4   | 305677.84 | 302.33   | Peptide substrate AAAA                            | Hydrolase | Protein | X-ray | 2008-04-22 |
| U | 4   | 305677.84 | 302.33   | Peptide substrate AAAA                            | Hydrolase | Protein | X-ray | 2008-04-22 |
| V | 4   | 305677.84 | 302.33   | Peptide substrate AAAA                            | Hydrolase | Protein | X-ray | 2008-04-22 |
| W | 4   | 305677.84 | 302.33   | Peptide substrate AAAA                            | Hydrolase | Protein | X-ray | 2008-04-22 |

|      |      |     |           |           |          |                           |                           |                                  |                              |         |         |            |            |
|------|------|-----|-----------|-----------|----------|---------------------------|---------------------------|----------------------------------|------------------------------|---------|---------|------------|------------|
| 3AH5 | X    | 4   | 305677.84 | 302.33    |          | Peptide substrate AAAA    | Hydrolase                 |                                  |                              | Protein | X-ray   | 2008-04-22 |            |
|      | Y    | 4   | 305677.84 | 302.33    |          | Peptide substrate AAAA    | Hydrolase                 |                                  |                              | Protein | X-ray   | 2008-04-22 |            |
|      | Z    | 4   | 305677.84 | 302.33    |          | Peptide substrate AAAA    | Hydrolase                 |                                  |                              | Protein | X-ray   | 2008-04-22 |            |
|      | A    | 216 | 158692.48 | 25178.90  | 785.56   | Thymidylate synthase thyx | Transferase               | Flavin-adenine dinucleotide      | FAD                          | Protein | X-ray   | 2011-04-20 |            |
|      | A    | 216 | 158692.48 | 25178.90  | 96.06    | Thymidylate synthase thyx | Transferase               | Sulfate ion                      | SO4                          | Protein | X-ray   | 2011-04-20 |            |
|      | A    | 216 | 158692.48 | 25178.90  | 308.18   | Thymidylate synthase thyx | Transferase               | 2'-deoxyuridine 5'-monophosphate | UMP                          | Protein | X-ray   | 2011-04-20 |            |
|      | B    | 216 | 158692.48 | 25178.90  | 785.56   | Thymidylate synthase thyx | Transferase               | Flavin-adenine dinucleotide      | FAD                          | Protein | X-ray   | 2011-04-20 |            |
|      | B    | 216 | 158692.48 | 25178.90  | 308.18   | Thymidylate synthase thyx | Transferase               | 2'-deoxyuridine 5'-monophosphate | UMP                          | Protein | X-ray   | 2011-04-20 |            |
|      | C    | 216 | 158692.48 | 25178.90  | 785.56   | Thymidylate synthase thyx | Transferase               | Flavin-adenine dinucleotide      | FAD                          | Protein | X-ray   | 2011-04-20 |            |
|      | C    | 216 | 158692.48 | 25178.90  | 96.06    | Thymidylate synthase thyx | Transferase               | Sulfate ion                      | SO4                          | Protein | X-ray   | 2011-04-20 |            |
|      | C    | 216 | 158692.48 | 25178.90  | 308.18   | Thymidylate synthase thyx | Transferase               | 2'-deoxyuridine 5'-monophosphate | UMP                          | Protein | X-ray   | 2011-04-20 |            |
|      | D    | 216 | 158692.48 | 25178.90  | 785.56   | Thymidylate synthase thyx | Transferase               | Flavin-adenine dinucleotide      | FAD                          | Protein | X-ray   | 2011-04-20 |            |
|      | D    | 216 | 158692.48 | 25178.90  | 96.06    | Thymidylate synthase thyx | Transferase               | Sulfate ion                      | SO4                          | Protein | X-ray   | 2011-04-20 |            |
|      | D    | 216 | 158692.48 | 25178.90  | 308.18   | Thymidylate synthase thyx | Transferase               | 2'-deoxyuridine 5'-monophosphate | UMP                          | Protein | X-ray   | 2011-04-20 |            |
|      | E    | 216 | 158692.48 | 25178.90  | 785.56   | Thymidylate synthase thyx | Transferase               | Flavin-adenine dinucleotide      | FAD                          | Protein | X-ray   | 2011-04-20 |            |
|      | E    | 216 | 158692.48 | 25178.90  | 96.06    | Thymidylate synthase thyx | Transferase               | Sulfate ion                      | SO4                          | Protein | X-ray   | 2011-04-20 |            |
|      | E    | 216 | 158692.48 | 25178.90  | 308.18   | Thymidylate synthase thyx | Transferase               | 2'-deoxyuridine 5'-monophosphate | UMP                          | Protein | X-ray   | 2011-04-20 |            |
|      | 3AKJ | F   | 216       | 158692.48 | 25178.90 | 785.56                    | Thymidylate synthase thyx | Transferase                      | Flavin-adenine dinucleotide  | FAD     | Protein | X-ray      | 2011-04-20 |
| F    |      | 216 | 158692.48 | 25178.90  | 96.06    | Thymidylate synthase thyx | Transferase               | Sulfate ion                      | SO4                          | Protein | X-ray   | 2011-04-20 |            |
| F    |      | 216 | 158692.48 | 25178.90  | 308.18   | Thymidylate synthase thyx | Transferase               | 2'-deoxyuridine 5'-monophosphate | UMP                          | Protein | X-ray   | 2011-04-20 |            |
| A    |      | 325 | 75308.00  | 37654.00  |          | Ctka                      | Transferase               |                                  |                              | Protein | X-ray   | 2010-12-01 |            |
| B    |      | 325 | 75308.00  | 37654.00  |          | Ctka                      | Transferase               |                                  |                              | Protein | X-ray   | 2010-12-01 |            |
| 3AKK |      | A   | 325       | 152422.03 | 37654.00 | 427.20                    | Ctka                      | Transferase                      | Adenosine-5'-diphosphate     | ADP     | Protein | X-ray      | 2010-12-01 |
|      | A    | 325 | 152422.03 | 37654.00  | 24.31    | Ctka                      | Transferase               | Magnesium ion                    | MG                           | Protein | X-ray   | 2010-12-01 |            |
|      | B    | 325 | 152422.03 | 37654.00  | 427.20   | Ctka                      | Transferase               | Adenosine-5'-diphosphate         | ADP                          | Protein | X-ray   | 2010-12-01 |            |
|      | B    | 325 | 152422.03 | 37654.00  | 24.31    | Ctka                      | Transferase               | Magnesium ion                    | MG                           | Protein | X-ray   | 2010-12-01 |            |
|      | C    | 325 | 152422.03 | 37654.00  | 427.20   | Ctka                      | Transferase               | Adenosine-5'-diphosphate         | ADP                          | Protein | X-ray   | 2010-12-01 |            |
|      | C    | 325 | 152422.03 | 37654.00  | 24.31    | Ctka                      | Transferase               | Magnesium ion                    | MG                           | Protein | X-ray   | 2010-12-01 |            |
|      | D    | 325 | 152422.03 | 37654.00  | 427.20   | Ctka                      | Transferase               | Adenosine-5'-diphosphate         | ADP                          | Protein | X-ray   | 2010-12-01 |            |
|      | D    | 325 | 152422.03 | 37654.00  | 24.31    | Ctka                      | Transferase               | Magnesium ion                    | MG                           | Protein | X-ray   | 2010-12-01 |            |
|      | 3AKL | A   | 325       | 152731.94 | 37654.00 | 506.20                    | Ctka                      | Transferase                      | Phosphoaminophosphonic acid- | ANP     | Protein | X-ray      | 2010-12-01 |

|             |   |     |           |          |        |                                               |                 |                                             |     |         |       |            |
|-------------|---|-----|-----------|----------|--------|-----------------------------------------------|-----------------|---------------------------------------------|-----|---------|-------|------------|
|             |   |     |           |          |        |                                               | adenylate ester |                                             |     |         |       |            |
|             | A | 325 | 152731.94 | 37654.00 | 24.31  | Ctka                                          | Transferase     | Magnesium ion                               | MG  | Protein | X-ray | 2010-12-01 |
|             | B | 325 | 152731.94 | 37654.00 | 506.20 | Ctka                                          | Transferase     | Phosphoaminophosphonic acid-adenylate ester | ANP | Protein | X-ray | 2010-12-01 |
|             |   |     |           |          |        |                                               |                 |                                             |     |         |       |            |
|             | B | 325 | 152731.94 | 37654.00 | 24.31  | Ctka                                          | Transferase     | Magnesium ion                               | MG  | Protein | X-ray | 2010-12-01 |
|             | C | 325 | 152731.94 | 37654.00 | 427.20 | Ctka                                          | Transferase     | Adenosine-5'-diphosphate                    | ADP | Protein | X-ray | 2010-12-01 |
|             | C | 325 | 152731.94 | 37654.00 | 24.31  | Ctka                                          | Transferase     | Magnesium ion                               | MG  | Protein | X-ray | 2010-12-01 |
|             | D | 325 | 152731.94 | 37654.00 | 506.20 | Ctka                                          | Transferase     | Phosphoaminophosphonic acid-adenylate ester | ANP | Protein | X-ray | 2010-12-01 |
|             |   |     |           |          |        |                                               |                 |                                             |     |         |       |            |
|             | D | 325 | 152731.94 | 37654.00 | 24.31  | Ctka                                          | Transferase     | Magnesium ion                               | MG  | Protein | X-ray | 2010-12-01 |
| <b>3B7J</b> | A | 159 | 110639.91 | 18206.30 | 120.15 | (3R)-hydroxymyristoyl-acylprotein dehydratase | Lyase           | Benzamidine                                 | BEN | Protein | X-ray | 2008-09-02 |
|             |   |     |           |          |        |                                               |                 |                                             |     |         |       |            |
|             | A | 159 | 110639.91 | 18206.30 | 35.45  | (3R)-hydroxymyristoyl-acylprotein dehydratase | Lyase           | Chloride ion                                | CL  | Protein | X-ray | 2008-09-02 |
|             |   |     |           |          |        |                                               |                 |                                             |     |         |       |            |
|             | B | 159 | 110639.91 | 18206.30 | 120.15 | (3R)-hydroxymyristoyl-acylprotein dehydratase | Lyase           | Benzamidine                                 | BEN | Protein | X-ray | 2008-09-02 |
|             |   |     |           |          |        |                                               |                 |                                             |     |         |       |            |
|             | B | 159 | 110639.91 | 18206.30 | 35.45  | (3R)-hydroxymyristoyl-acylprotein dehydratase | Lyase           | Chloride ion                                | CL  | Protein | X-ray | 2008-09-02 |
|             |   |     |           |          |        |                                               |                 |                                             |     |         |       |            |
|             | B | 159 | 110639.91 | 18206.30 | 174.16 | (3R)-hydroxymyristoyl-acylprotein dehydratase | Lyase           | 5-hydroxynaphthalene-1,4-dione              | JUG | Protein | X-ray | 2008-09-02 |
|             |   |     |           |          |        |                                               |                 |                                             |     |         |       |            |
|             | C | 159 | 110639.91 | 18206.30 | 120.15 | (3R)-hydroxymyristoyl-acylprotein dehydratase | Lyase           | Benzamidine                                 | BEN | Protein | X-ray | 2008-09-02 |
|             |   |     |           |          |        |                                               |                 |                                             |     |         |       |            |
|             | C | 159 | 110639.91 | 18206.30 | 35.45  | (3R)-hydroxymyristoyl-acylprotein dehydratase | Lyase           | Chloride ion                                | CL  | Protein | X-ray | 2008-09-02 |
|             |   |     |           |          |        |                                               |                 |                                             |     |         |       |            |
|             | C | 159 | 110639.91 | 18206.30 | 174.16 | (3R)-hydroxymyristoyl-acylprotein dehydratase | Lyase           | 5-hydroxynaphthalene-1,4-dione              | JUG | Protein | X-ray | 2008-09-02 |
|             |   |     |           |          |        |                                               |                 |                                             |     |         |       |            |
|             | D | 159 | 110639.91 | 18206.30 | 35.45  | (3R)-hydroxymyristoyl-acylprotein dehydratase | Lyase           | Chloride ion                                | CL  | Protein | X-ray | 2008-09-02 |
|             |   |     |           |          |        |                                               |                 |                                             |     |         |       |            |
|             | E | 159 | 110639.91 | 18206.30 | 120.15 | (3R)-hydroxymyristoyl-acylprotein dehydratase | Lyase           | Benzamidine                                 | BEN | Protein | X-ray | 2008-09-02 |
|             |   |     |           |          |        |                                               |                 |                                             |     |         |       |            |
|             | E | 159 | 110639.91 | 18206.30 | 35.45  | (3R)-hydroxymyristoyl-acylprotein dehydratase | Lyase           | Chloride ion                                | CL  | Protein | X-ray | 2008-09-02 |

|             |   |     |           |          |             |                                                         |                      |                   |     |         |       |                    |
|-------------|---|-----|-----------|----------|-------------|---------------------------------------------------------|----------------------|-------------------|-----|---------|-------|--------------------|
|             |   |     |           |          | dehydratase |                                                         |                      |                   |     |         |       |                    |
|             | F | 159 | 110639.91 | 18206.30 | 120.15      | (3R)-hydroxymyristoyl-acylprotein                       | Lyase                | Benzamidine       | BEN | Protein | X-ray | 2008-09-02         |
|             |   |     |           |          | dehydratase |                                                         |                      |                   |     |         |       |                    |
|             | F | 159 | 110639.91 | 18206.30 | 35.45       | (3R)-hydroxymyristoyl-acylprotein                       | Lyase                | Chloride ion      | CL  | Protein | X-ray | 2008-09-02         |
|             |   |     |           |          | dehydratase |                                                         |                      |                   |     |         |       |                    |
| <b>3BGH</b> | A | 236 | 55233.49  | 27376.60 | 96.06       | Putative neuraminylactose-binding hemagglutinin homolog | SG, unknown function | Sulfate ion       | SO4 | Protein | X-ray | 2007-12-11 NYSRCSG |
|             | B | 236 | 55233.49  | 27376.60 | 96.06       | Putative neuraminylactose-binding hemagglutinin homolog | SG, unknown function | Sulfate ion       | SO4 | Protein | X-ray | 2007-12-11 NYSRCSG |
| <b>3BVE</b> | A | 181 | 126021.88 | 20957.60 |             | Ferritin                                                | Oxidoreductase       |                   |     | Protein | X-ray | 2009-01-13         |
|             | B | 181 | 126021.88 | 20957.60 | 92.09       | Ferritin                                                | Oxidoreductase       | Glycerol          | GOL | Protein | X-ray | 2009-01-13         |
|             | C | 181 | 126021.88 | 20957.60 | 92.09       | Ferritin                                                | Oxidoreductase       | Glycerol          | GOL | Protein | X-ray | 2009-01-13         |
|             | D | 181 | 126021.88 | 20957.60 |             | Ferritin                                                | Oxidoreductase       |                   |     | Protein | X-ray | 2009-01-13         |
|             | E | 181 | 126021.88 | 20957.60 |             | Ferritin                                                | Oxidoreductase       |                   |     | Protein | X-ray | 2009-01-13         |
|             | F | 181 | 126021.88 | 20957.60 | 92.09       | Ferritin                                                | Oxidoreductase       | Glycerol          | GOL | Protein | X-ray | 2009-01-13         |
| <b>3BVF</b> | A | 181 | 127580.73 | 20957.60 | 55.85       | Ferritin                                                | Oxidoreductase       | Fe (iii) ion      | FE  | Protein | X-ray | 2009-01-13         |
|             | A | 181 | 127580.73 | 20957.60 | 60.10       | Ferritin                                                | Oxidoreductase       | Isopropyl alcohol | IPA | Protein | X-ray | 2009-01-13         |
|             | B | 181 | 127580.73 | 20957.60 | 55.85       | Ferritin                                                | Oxidoreductase       | Fe (iii) ion      | FE  | Protein | X-ray | 2009-01-13         |
|             | B | 181 | 127580.73 | 20957.60 | 60.10       | Ferritin                                                | Oxidoreductase       | Isopropyl alcohol | IPA | Protein | X-ray | 2009-01-13         |
|             | C | 181 | 127580.73 | 20957.60 | 55.85       | Ferritin                                                | Oxidoreductase       | Fe (iii) ion      | FE  | Protein | X-ray | 2009-01-13         |
|             | C | 181 | 127580.73 | 20957.60 | 60.10       | Ferritin                                                | Oxidoreductase       | Isopropyl alcohol | IPA | Protein | X-ray | 2009-01-13         |
|             | D | 181 | 127580.73 | 20957.60 | 55.85       | Ferritin                                                | Oxidoreductase       | Fe (iii) ion      | FE  | Protein | X-ray | 2009-01-13         |
|             | D | 181 | 127580.73 | 20957.60 | 92.09       | Ferritin                                                | Oxidoreductase       | Glycerol          | GOL | Protein | X-ray | 2009-01-13         |
|             | D | 181 | 127580.73 | 20957.60 | 60.10       | Ferritin                                                | Oxidoreductase       | Isopropyl alcohol | IPA | Protein | X-ray | 2009-01-13         |
|             | E | 181 | 127580.73 | 20957.60 | 55.85       | Ferritin                                                | Oxidoreductase       | Fe (iii) ion      | FE  | Protein | X-ray | 2009-01-13         |
|             | E | 181 | 127580.73 | 20957.60 | 92.09       | Ferritin                                                | Oxidoreductase       | Glycerol          | GOL | Protein | X-ray | 2009-01-13         |
|             | E | 181 | 127580.73 | 20957.60 | 60.10       | Ferritin                                                | Oxidoreductase       | Isopropyl alcohol | IPA | Protein | X-ray | 2009-01-13         |
|             | F | 181 | 127580.73 | 20957.60 | 55.85       | Ferritin                                                | Oxidoreductase       | Fe (iii) ion      | FE  | Protein | X-ray | 2009-01-13         |
|             | F | 181 | 127580.73 | 20957.60 | 92.09       | Ferritin                                                | Oxidoreductase       | Glycerol          | GOL | Protein | X-ray | 2009-01-13         |
|             | F | 181 | 127580.73 | 20957.60 | 60.10       | Ferritin                                                | Oxidoreductase       | Isopropyl alcohol | IPA | Protein | X-ray | 2009-01-13         |
| <b>3BVI</b> | A | 181 | 126859.58 | 20957.60 | 55.85       | Ferritin                                                | Oxidoreductase       | Fe (iii) ion      | FE  | Protein | X-ray | 2009-01-13         |

|             |   |     |           |          |       |                                |                |              |     |         |       |            |
|-------------|---|-----|-----------|----------|-------|--------------------------------|----------------|--------------|-----|---------|-------|------------|
|             | B | 181 | 126859.58 | 20957.60 | 55.85 | Ferritin                       | Oxidoreductase | Fe (iii) ion | FE  | Protein | X-ray | 2009-01-13 |
|             | C | 181 | 126859.58 | 20957.60 | 55.85 | Ferritin                       | Oxidoreductase | Fe (iii) ion | FE  | Protein | X-ray | 2009-01-13 |
|             | D | 181 | 126859.58 | 20957.60 | 55.85 | Ferritin                       | Oxidoreductase | Fe (iii) ion | FE  | Protein | X-ray | 2009-01-13 |
|             | D | 181 | 126859.58 | 20957.60 | 92.09 | Ferritin                       | Oxidoreductase | Glycerol     | GOL | Protein | X-ray | 2009-01-13 |
|             | E | 181 | 126859.58 | 20957.60 | 55.85 | Ferritin                       | Oxidoreductase | Fe (iii) ion | FE  | Protein | X-ray | 2009-01-13 |
|             | E | 181 | 126859.58 | 20957.60 | 92.09 | Ferritin                       | Oxidoreductase | Glycerol     | GOL | Protein | X-ray | 2009-01-13 |
|             | F | 181 | 126859.58 | 20957.60 | 55.85 | Ferritin                       | Oxidoreductase | Fe (iii) ion | FE  | Protein | X-ray | 2009-01-13 |
| <b>3BVK</b> | A | 181 | 126803.73 | 20957.60 | 55.85 | Ferritin                       | Oxidoreductase | Fe (iii) ion | FE  | Protein | X-ray | 2009-01-13 |
|             | B | 181 | 126803.73 | 20957.60 | 55.85 | Ferritin                       | Oxidoreductase | Fe (iii) ion | FE  | Protein | X-ray | 2009-01-13 |
|             | B | 181 | 126803.73 | 20957.60 | 92.09 | Ferritin                       | Oxidoreductase | Glycerol     | GOL | Protein | X-ray | 2009-01-13 |
|             | C | 181 | 126803.73 | 20957.60 | 55.85 | Ferritin                       | Oxidoreductase | Fe (iii) ion | FE  | Protein | X-ray | 2009-01-13 |
|             | C | 181 | 126803.73 | 20957.60 | 92.09 | Ferritin                       | Oxidoreductase | Glycerol     | GOL | Protein | X-ray | 2009-01-13 |
|             | D | 181 | 126803.73 | 20957.60 | 55.85 | Ferritin                       | Oxidoreductase | Fe (iii) ion | FE  | Protein | X-ray | 2009-01-13 |
|             | E | 181 | 126803.73 | 20957.60 | 55.85 | Ferritin                       | Oxidoreductase | Fe (iii) ion | FE  | Protein | X-ray | 2009-01-13 |
|             | F | 181 | 126803.73 | 20957.60 | 55.85 | Ferritin                       | Oxidoreductase | Fe (iii) ion | FE  | Protein | X-ray | 2009-01-13 |
|             | F | 181 | 126803.73 | 20957.60 | 92.09 | Ferritin                       | Oxidoreductase | Glycerol     | GOL | Protein | X-ray | 2009-01-13 |
| <b>3BVL</b> | A | 181 | 126915.43 | 20957.60 | 55.85 | Ferritin                       | Oxidoreductase | Fe (iii) ion | FE  | Protein | X-ray | 2009-01-13 |
|             | B | 181 | 126915.43 | 20957.60 | 55.85 | Ferritin                       | Oxidoreductase | Fe (iii) ion | FE  | Protein | X-ray | 2009-01-13 |
|             | B | 181 | 126915.43 | 20957.60 | 92.09 | Ferritin                       | Oxidoreductase | Glycerol     | GOL | Protein | X-ray | 2009-01-13 |
|             | C | 181 | 126915.43 | 20957.60 | 55.85 | Ferritin                       | Oxidoreductase | Fe (iii) ion | FE  | Protein | X-ray | 2009-01-13 |
|             | D | 181 | 126915.43 | 20957.60 | 55.85 | Ferritin                       | Oxidoreductase | Fe (iii) ion | FE  | Protein | X-ray | 2009-01-13 |
|             | D | 181 | 126915.43 | 20957.60 | 92.09 | Ferritin                       | Oxidoreductase | Glycerol     | GOL | Protein | X-ray | 2009-01-13 |
|             | E | 181 | 126915.43 | 20957.60 | 55.85 | Ferritin                       | Oxidoreductase | Fe (iii) ion | FE  | Protein | X-ray | 2009-01-13 |
|             | F | 181 | 126915.43 | 20957.60 | 55.85 | Ferritin                       | Oxidoreductase | Fe (iii) ion | FE  | Protein | X-ray | 2009-01-13 |
|             | F | 181 | 126915.43 | 20957.60 | 92.09 | Ferritin                       | Oxidoreductase | Glycerol     | GOL | Protein | X-ray | 2009-01-13 |
| <b>3C4U</b> | A | 307 | 67778.94  | 33801.10 | 22.99 | Fructose-bisphosphate aldolase | Lyase          | Sodium ion   | NA  | Protein | X-ray | 2008-08-26 |
|             | A | 307 | 67778.94  | 33801.10 | 65.38 | Fructose-bisphosphate aldolase | Lyase          | Zinc ion     | ZN  | Protein | X-ray | 2008-08-26 |
|             | B | 307 | 67778.94  | 33801.10 | 22.99 | Fructose-bisphosphate aldolase | Lyase          | Sodium ion   | NA  | Protein | X-ray | 2008-08-26 |
|             | B | 307 | 67778.94  | 33801.10 | 65.38 | Fructose-bisphosphate aldolase | Lyase          | Zinc ion     | ZN  | Protein | X-ray | 2008-08-26 |
| <b>3C52</b> | A | 307 | 68201.20  | 33801.10 | 40.08 | Fructose-bisphosphate aldolase | Lyase          | Calcium ion  | CA  | Protein | X-ray | 2008-08-26 |
|             | A | 307 | 68201.20  | 33801.10 | 22.99 | Fructose-bisphosphate aldolase | Lyase          | Sodium ion   | NA  | Protein | X-ray | 2008-08-26 |

|             |   |     |           |          |        |                                                  |                |                                                                      |     |         |       |            |
|-------------|---|-----|-----------|----------|--------|--------------------------------------------------|----------------|----------------------------------------------------------------------|-----|---------|-------|------------|
|             | A | 307 | 68201.20  | 33801.10 | 171.05 | Fructose-bisphosphate aldolase                   | Lyase          | Phosphoglycolohydroxamic acid                                        | PGH | Protein | X-ray | 2008-08-26 |
|             | A | 307 | 68201.20  | 33801.10 | 65.38  | Fructose-bisphosphate aldolase                   | Lyase          | Zinc ion                                                             | ZN  | Protein | X-ray | 2008-08-26 |
|             | B | 307 | 68201.20  | 33801.10 | 40.08  | Fructose-bisphosphate aldolase                   | Lyase          | Calcium ion                                                          | CA  | Protein | X-ray | 2008-08-26 |
|             | B | 307 | 68201.20  | 33801.10 | 22.99  | Fructose-bisphosphate aldolase                   | Lyase          | Sodium ion                                                           | NA  | Protein | X-ray | 2008-08-26 |
|             | B | 307 | 68201.20  | 33801.10 | 171.05 | Fructose-bisphosphate aldolase                   | Lyase          | Phosphoglycolohydroxamic acid                                        | PGH | Protein | X-ray | 2008-08-26 |
|             | B | 307 | 68201.20  | 33801.10 | 65.38  | Fructose-bisphosphate aldolase                   | Lyase          | Zinc ion                                                             | ZN  | Protein | X-ray | 2008-08-26 |
| <b>3C56</b> | A | 307 | 68351.18  | 33801.10 | 309.11 | Fructose-bisphosphate aldolase                   | Lyase          | 3-(hydroxy[(phosphonoxy)acetyl]amino<br>}propyl dihydrogen phosphate | PH4 | Protein | X-ray | 2008-08-26 |
|             | A | 307 | 68351.18  | 33801.10 | 65.38  | Fructose-bisphosphate aldolase                   | Lyase          | Zinc ion                                                             | ZN  | Protein | X-ray | 2008-08-26 |
|             | B | 307 | 68351.18  | 33801.10 | 309.11 | Fructose-bisphosphate aldolase                   | Lyase          | 3-(hydroxy[(phosphonoxy)acetyl]amino<br>}propyl dihydrogen phosphate | PH4 | Protein | X-ray | 2008-08-26 |
|             | B | 307 | 68351.18  | 33801.10 | 65.38  | Fructose-bisphosphate aldolase                   | Lyase          | Zinc ion                                                             | ZN  | Protein | X-ray | 2008-08-26 |
| <b>3C5Q</b> | A | 425 | 47960.63  | 47474.20 | 92.09  | Diaminopimelate decarboxylase                    | Lyase          | Glycerol                                                             | GOL | Protein | X-ray | 2008-05-27 |
|             | A | 425 | 47960.63  | 47474.20 | 247.14 | Diaminopimelate decarboxylase                    | Lyase          | Pyridoxal-5'-phosphate                                               | PLP | Protein | X-ray | 2008-05-27 |
| <b>3CEI</b> | A | 213 | 49303.55  | 24547.90 | 55.85  | Superoxide dismutase                             | Oxidoreductase | Fe (iii) ion                                                         | FE  | Protein | X-ray | 2008-06-10 |
|             | A | 213 | 49303.55  | 24547.90 | 96.06  | Superoxide dismutase                             | Oxidoreductase | Sulfate ion                                                          | SO4 | Protein | X-ray | 2008-06-10 |
|             | B | 213 | 49303.55  | 24547.90 | 55.85  | Superoxide dismutase                             | Oxidoreductase | Fe (iii) ion                                                         | FE  | Protein | X-ray | 2008-06-10 |
| <b>3CF8</b> | A | 159 | 110775.93 | 18206.30 | 120.15 | (3R)-hydroxymyristoyl-acylprotein<br>dehydratase | Lyase          | Benzamidine                                                          | BEN | Protein | X-ray | 2008-12-09 |
|             | A | 159 | 110775.93 | 18206.30 | 35.45  | (3R)-hydroxymyristoyl-acylprotein<br>dehydratase | Lyase          | Chloride ion                                                         | CL  | Protein | X-ray | 2008-12-09 |
|             | A | 159 | 110775.93 | 18206.30 | 302.24 | (3R)-hydroxymyristoyl-acylprotein<br>dehydratase | Lyase          | 3,5,7,3',4'-pentahydroxyflavone                                      | QUE | Protein | X-ray | 2008-12-09 |
|             | B | 159 | 110775.93 | 18206.30 | 120.15 | (3R)-hydroxymyristoyl-acylprotein<br>dehydratase | Lyase          | Benzamidine                                                          | BEN | Protein | X-ray | 2008-12-09 |
|             | B | 159 | 110775.93 | 18206.30 | 35.45  | (3R)-hydroxymyristoyl-acylprotein<br>dehydratase | Lyase          | Chloride ion                                                         | CL  | Protein | X-ray | 2008-12-09 |
|             | C | 159 | 110775.93 | 18206.30 | 120.15 | (3R)-hydroxymyristoyl-acylprotein<br>dehydratase | Lyase          | Benzamidine                                                          | BEN | Protein | X-ray | 2008-12-09 |

|             |   |     |           |          |        |                                                  |       |                                                        |     |         |       |            |
|-------------|---|-----|-----------|----------|--------|--------------------------------------------------|-------|--------------------------------------------------------|-----|---------|-------|------------|
|             | C | 159 | 110775.93 | 18206.30 | 35.45  | (3R)-hydroxymyristoyl-acylprotein<br>dehydratase | Lyase | Chloride ion                                           | CL  | Protein | X-ray | 2008-12-09 |
|             | C | 159 | 110775.93 | 18206.30 | 302.24 | (3R)-hydroxymyristoyl-acylprotein<br>dehydratase | Lyase | 3,5,7,3',4'-pentahydroxyflavone                        | QUE | Protein | X-ray | 2008-12-09 |
|             | D | 159 | 110775.93 | 18206.30 | 35.45  | (3R)-hydroxymyristoyl-acylprotein<br>dehydratase | Lyase | Chloride ion                                           | CL  | Protein | X-ray | 2008-12-09 |
|             | E | 159 | 110775.93 | 18206.30 | 35.45  | (3R)-hydroxymyristoyl-acylprotein<br>dehydratase | Lyase | Chloride ion                                           | CL  | Protein | X-ray | 2008-12-09 |
|             | F | 159 | 110775.93 | 18206.30 | 35.45  | (3R)-hydroxymyristoyl-acylprotein<br>dehydratase | Lyase | Chloride ion                                           | CL  | Protein | X-ray | 2008-12-09 |
| <b>3CF9</b> | A | 159 | 110471.62 | 18206.30 | 270.24 | (3R)-hydroxymyristoyl-acylprotein<br>dehydratase | Lyase | 5,7-dihydroxy-2-(4-hydroxyphenyl)-<br>4h-chromen-4-one | AGI | Protein | X-ray | 2008-12-09 |
|             | A | 159 | 110471.62 | 18206.30 | 35.45  | (3R)-hydroxymyristoyl-acylprotein<br>dehydratase | Lyase | Chloride ion                                           | CL  | Protein | X-ray | 2008-12-09 |
|             | B | 159 | 110471.62 | 18206.30 | 120.15 | (3R)-hydroxymyristoyl-acylprotein<br>dehydratase | Lyase | Benzamidine                                            | BEN | Protein | X-ray | 2008-12-09 |
|             | B | 159 | 110471.62 | 18206.30 | 35.45  | (3R)-hydroxymyristoyl-acylprotein<br>dehydratase | Lyase | Chloride ion                                           | CL  | Protein | X-ray | 2008-12-09 |
|             | C | 159 | 110471.62 | 18206.30 | 270.24 | (3R)-hydroxymyristoyl-acylprotein<br>dehydratase | Lyase | 5,7-dihydroxy-2-(4-hydroxyphenyl)-<br>4h-chromen-4-one | AGI | Protein | X-ray | 2008-12-09 |
|             | C | 159 | 110471.62 | 18206.30 | 120.15 | (3R)-hydroxymyristoyl-acylprotein<br>dehydratase | Lyase | Benzamidine                                            | BEN | Protein | X-ray | 2008-12-09 |
|             | C | 159 | 110471.62 | 18206.30 | 35.45  | (3R)-hydroxymyristoyl-acylprotein<br>dehydratase | Lyase | Chloride ion                                           | CL  | Protein | X-ray | 2008-12-09 |
|             | D | 159 | 110471.62 | 18206.30 | 35.45  | (3R)-hydroxymyristoyl-acylprotein<br>dehydratase | Lyase | Chloride ion                                           | CL  | Protein | X-ray | 2008-12-09 |
|             | E | 159 | 110471.62 | 18206.30 | 120.15 | (3R)-hydroxymyristoyl-acylprotein<br>dehydratase | Lyase | Benzamidine                                            | BEN | Protein | X-ray | 2008-12-09 |
|             | E | 159 | 110471.62 | 18206.30 | 35.45  | (3R)-hydroxymyristoyl-acylprotein<br>dehydratase | Lyase | Chloride ion                                           | CL  | Protein | X-ray | 2008-12-09 |
|             | F | 159 | 110471.62 | 18206.30 | 35.45  | (3R)-hydroxymyristoyl-acylprotein                | Lyase | Chloride ion                                           | CL  | Protein | X-ray | 2008-12-09 |

| dehydratase |      |           |           |           |                         |                           |                         |                                   |         |         |            |            |            |
|-------------|------|-----------|-----------|-----------|-------------------------|---------------------------|-------------------------|-----------------------------------|---------|---------|------------|------------|------------|
| 3CLH        | A    | 343       | 79810.02  | 39176.20  | 663.43                  | 3-dehydroquinase synthase | Lyase                   | Nicotinamide-adenine-dinucleotide | NAD     | Protein | X-ray      | 2009-03-24 |            |
|             | A    | 343       | 79810.02  | 39176.20  | 65.38                   | 3-dehydroquinase synthase | Lyase                   | Zinc ion                          | ZN      | Protein | X-ray      | 2009-03-24 |            |
|             | B    | 343       | 79810.02  | 39176.20  | 663.43                  | 3-dehydroquinase synthase | Lyase                   | Nicotinamide-adenine-dinucleotide | NAD     | Protein | X-ray      | 2009-03-24 |            |
|             | B    | 343       | 79810.02  | 39176.20  | 65.38                   | 3-dehydroquinase synthase | Lyase                   | Zinc ion                          | ZN      | Protein | X-ray      | 2009-03-24 |            |
| 3CWX        | A    | 176       | 62332.80  | 20777.60  | 196.11                  | Protein cagd              | Unknown function        | Selenomethionine                  | MSE     | Protein | X-ray      | 2008-12-30 |            |
|             | B    | 176       | 62332.80  | 20777.60  | 196.11                  | Protein cagd              | Unknown function        | Selenomethionine                  | MSE     | Protein | X-ray      | 2008-12-30 |            |
|             | C    | 176       | 62332.80  | 20777.60  | 196.11                  | Protein cagd              | Unknown function        | Selenomethionine                  | MSE     | Protein | X-ray      | 2008-12-30 |            |
| 3CWY        | A    | 176       | 20841.15  | 20777.60  | 63.55                   | Protein cagd              | Unknown function        | Copper (ii) ion                   | CU      | Protein | X-ray      | 2008-12-30 |            |
|             | A    | 176       | 20841.15  | 20777.60  | 196.11                  | Protein cagd              | Unknown function        | Selenomethionine                  | MSE     | Protein | X-ray      | 2008-12-30 |            |
| 3CXN        | A    | 274       | 94110.00  | 31339.30  | 196.11                  | Ureaseprotein uref        | Chaperone               | Selenomethionine                  | MSE     | Protein | X-ray      | 2009-05-12 |            |
|             | B    | 274       | 94110.00  | 31339.30  | 92.09                   | Ureaseprotein uref        | Chaperone               | Glycerol                          | GOL     | Protein | X-ray      | 2009-05-12 |            |
|             | B    | 274       | 94110.00  | 31339.30  | 196.11                  | Ureaseprotein uref        | Chaperone               | Selenomethionine                  | MSE     | Protein | X-ray      | 2009-05-12 |            |
|             | C    | 274       | 94110.00  | 31339.30  | 196.11                  | Ureaseprotein uref        | Chaperone               | Selenomethionine                  | MSE     | Protein | X-ray      | 2009-05-12 |            |
|             | B    | 138       | 63760.40  | 15940.10  |                         | Chemotaxis protein motb   | Membrane protein        |                                   |         | Protein | X-ray      | 2008-07-08 |            |
|             | C    | 138       | 63760.40  | 15940.10  |                         | Chemotaxis protein motb   | Membrane protein        |                                   |         | Protein | X-ray      | 2008-07-08 |            |
|             | D    | 138       | 63760.40  | 15940.10  |                         | Chemotaxis protein motb   | Membrane protein        |                                   |         | Protein | X-ray      | 2008-07-08 |            |
|             | E    | 138       | 63760.40  | 15940.10  |                         | Chemotaxis protein motb   | Membrane protein        |                                   |         | Protein | X-ray      | 2008-07-08 |            |
|             | 3CYQ | A         | 138       | 255628.14 | 15940.10                |                           | Chemotaxis protein motb | Membrane protein                  |         |         | Protein    | X-ray      | 2008-07-08 |
|             |      | B         | 138       | 255628.14 | 15940.10                |                           | Chemotaxis protein motb | Membrane protein                  |         |         | Protein    | X-ray      | 2008-07-08 |
| C           |      | 138       | 255628.14 | 15940.10  |                         | Chemotaxis protein motb   | Membrane protein        |                                   |         | Protein | X-ray      | 2008-07-08 |            |
| D           |      | 138       | 255628.14 | 15940.10  | 293.27                  | Chemotaxis protein motb   | Membrane protein        | Beta-n-acetylmuramic acid         | AMU     | Protein | X-ray      | 2008-07-08 |            |
| E           |      | 138       | 255628.14 | 15940.10  |                         | Chemotaxis protein motb   | Membrane protein        |                                   |         | Protein | X-ray      | 2008-07-08 |            |
| F           |      | 138       | 255628.14 | 15940.10  |                         | Chemotaxis protein motb   | Membrane protein        |                                   |         | Protein | X-ray      | 2008-07-08 |            |
| G           |      | 138       | 255628.14 | 15940.10  |                         | Chemotaxis protein motb   | Membrane protein        |                                   |         | Protein | X-ray      | 2008-07-08 |            |
| H           |      | 138       | 255628.14 | 15940.10  |                         | Chemotaxis protein motb   | Membrane protein        |                                   |         | Protein | X-ray      | 2008-07-08 |            |
| I           |      | 138       | 255628.14 | 15940.10  |                         | Chemotaxis protein motb   | Membrane protein        |                                   |         | Protein | X-ray      | 2008-07-08 |            |
| J           |      | 138       | 255628.14 | 15940.10  |                         | Chemotaxis protein motb   | Membrane protein        |                                   |         | Protein | X-ray      | 2008-07-08 |            |
| K           |      | 138       | 255628.14 | 15940.10  | 293.27                  | Chemotaxis protein motb   | Membrane protein        | Beta-n-acetylmuramic acid         | AMU     | Protein | X-ray      | 2008-07-08 |            |
| L           | 138  | 255628.14 | 15940.10  |           | Chemotaxis protein motb | Membrane protein          |                         |                                   | Protein | X-ray   | 2008-07-08 |            |            |
| M           | 138  | 255628.14 | 15940.10  |           | Chemotaxis protein motb | Membrane protein          |                         |                                   | Protein | X-ray   | 2008-07-08 |            |            |

|      |   |     |           |          |        |                                               |                  |                                                                           |     |         |       |            |
|------|---|-----|-----------|----------|--------|-----------------------------------------------|------------------|---------------------------------------------------------------------------|-----|---------|-------|------------|
| 3D04 | N | 138 | 255628.14 | 15940.10 |        | Chemotaxis protein motb                       | Membrane protein |                                                                           |     | Protein | X-ray | 2008-07-08 |
|      | O | 138 | 255628.14 | 15940.10 |        | Chemotaxis protein motb                       | Membrane protein |                                                                           |     | Protein | X-ray | 2008-07-08 |
|      | P | 138 | 255628.14 | 15940.10 |        | Chemotaxis protein motb                       | Membrane protein |                                                                           |     | Protein | X-ray | 2008-07-08 |
|      | A | 159 | 110744.01 | 18206.30 | 120.15 | (3R)-hydroxymyristoyl-acylprotein dehydratase | Lyase            | Benzamidine                                                               | BEN | Protein | X-ray | 2008-12-09 |
|      | A | 159 | 110744.01 | 18206.30 | 35.45  | (3R)-hydroxymyristoyl-acylprotein dehydratase | Lyase            | Chloride ion                                                              | CL  | Protein | X-ray | 2008-12-09 |
|      | A | 159 | 110744.01 | 18206.30 | 286.28 | (3R)-hydroxymyristoyl-acylprotein dehydratase | Lyase            | (2s)-5-hydroxy-2-(4-hydroxyphenyl)-7-methoxy-2,3-dihydro-4h-chromen-4-one | SAK | Protein | X-ray | 2008-12-09 |
|      | B | 159 | 110744.01 | 18206.30 | 35.45  | (3R)-hydroxymyristoyl-acylprotein dehydratase | Lyase            | Chloride ion                                                              | CL  | Protein | X-ray | 2008-12-09 |
|      | C | 159 | 110744.01 | 18206.30 | 120.15 | (3R)-hydroxymyristoyl-acylprotein dehydratase | Lyase            | Benzamidine                                                               | BEN | Protein | X-ray | 2008-12-09 |
|      | C | 159 | 110744.01 | 18206.30 | 35.45  | (3R)-hydroxymyristoyl-acylprotein dehydratase | Lyase            | Chloride ion                                                              | CL  | Protein | X-ray | 2008-12-09 |
|      | C | 159 | 110744.01 | 18206.30 | 286.28 | (3R)-hydroxymyristoyl-acylprotein dehydratase | Lyase            | (2s)-5-hydroxy-2-(4-hydroxyphenyl)-7-methoxy-2,3-dihydro-4h-chromen-4-one | SAK | Protein | X-ray | 2008-12-09 |
|      | D | 159 | 110744.01 | 18206.30 | 35.45  | (3R)-hydroxymyristoyl-acylprotein dehydratase | Lyase            | Chloride ion                                                              | CL  | Protein | X-ray | 2008-12-09 |
|      | E | 159 | 110744.01 | 18206.30 | 120.15 | (3R)-hydroxymyristoyl-acylprotein dehydratase | Lyase            | Benzamidine                                                               | BEN | Protein | X-ray | 2008-12-09 |
|      | E | 159 | 110744.01 | 18206.30 | 35.45  | (3R)-hydroxymyristoyl-acylprotein dehydratase | Lyase            | Chloride ion                                                              | CL  | Protein | X-ray | 2008-12-09 |
|      | F | 159 | 110744.01 | 18206.30 | 120.15 | (3R)-hydroxymyristoyl-acylprotein dehydratase | Lyase            | Benzamidine                                                               | BEN | Protein | X-ray | 2008-12-09 |
|      | F | 159 | 110744.01 | 18206.30 | 35.45  | (3R)-hydroxymyristoyl-acylprotein dehydratase | Lyase            | Chloride ion                                                              | CL  | Protein | X-ray | 2008-12-09 |
| 3DOY | A | 159 | 111068.44 | 18206.30 | 448.50 | (3R)-hydroxymyristoyl-acylprotein dehydratase | Lyase            | 4-chloro-n'-[(1e)-(3,5-dibromo-2,4-dihydroxyphenyl)methylidene]benzohy    | 2BE | Protein | X-ray | 2009-05-05 |

---

|             |     |           |           |          |                                                  |                                                  |                                                                                       |                                                                                      |         |         |            |            |
|-------------|-----|-----------|-----------|----------|--------------------------------------------------|--------------------------------------------------|---------------------------------------------------------------------------------------|--------------------------------------------------------------------------------------|---------|---------|------------|------------|
|             |     |           |           |          |                                                  |                                                  | drazide                                                                               |                                                                                      |         |         |            |            |
| A           | 159 | 111068.44 | 18206.30  | 120.15   | (3R)-hydroxymyristoyl-acylprotein<br>dehydratase | Lyase                                            | Benzamidine                                                                           | BEN                                                                                  | Protein | X-ray   | 2009-05-05 |            |
| A           | 159 | 111068.44 | 18206.30  | 35.45    | (3R)-hydroxymyristoyl-acylprotein<br>dehydratase | Lyase                                            | Chloride ion                                                                          | CL                                                                                   | Protein | X-ray   | 2009-05-05 |            |
| B           | 159 | 111068.44 | 18206.30  | 120.15   | (3R)-hydroxymyristoyl-acylprotein<br>dehydratase | Lyase                                            | Benzamidine                                                                           | BEN                                                                                  | Protein | X-ray   | 2009-05-05 |            |
| B           | 159 | 111068.44 | 18206.30  | 35.45    | (3R)-hydroxymyristoyl-acylprotein<br>dehydratase | Lyase                                            | Chloride ion                                                                          | CL                                                                                   | Protein | X-ray   | 2009-05-05 |            |
| C           | 159 | 111068.44 | 18206.30  | 448.50   | (3R)-hydroxymyristoyl-acylprotein<br>dehydratase | Lyase                                            | 4-chloro-n'-[(1e)-(3,5-dibromo-2,4-<br>dihydroxyphenyl)methylidene]benzohy<br>drazide | 2BE                                                                                  | Protein | X-ray   | 2009-05-05 |            |
| C           | 159 | 111068.44 | 18206.30  | 120.15   | (3R)-hydroxymyristoyl-acylprotein<br>dehydratase | Lyase                                            | Benzamidine                                                                           | BEN                                                                                  | Protein | X-ray   | 2009-05-05 |            |
| C           | 159 | 111068.44 | 18206.30  | 35.45    | (3R)-hydroxymyristoyl-acylprotein<br>dehydratase | Lyase                                            | Chloride ion                                                                          | CL                                                                                   | Protein | X-ray   | 2009-05-05 |            |
| D           | 159 | 111068.44 | 18206.30  | 35.45    | (3R)-hydroxymyristoyl-acylprotein<br>dehydratase | Lyase                                            | Chloride ion                                                                          | CL                                                                                   | Protein | X-ray   | 2009-05-05 |            |
| E           | 159 | 111068.44 | 18206.30  | 120.15   | (3R)-hydroxymyristoyl-acylprotein<br>dehydratase | Lyase                                            | Benzamidine                                                                           | BEN                                                                                  | Protein | X-ray   | 2009-05-05 |            |
| E           | 159 | 111068.44 | 18206.30  | 35.45    | (3R)-hydroxymyristoyl-acylprotein<br>dehydratase | Lyase                                            | Chloride ion                                                                          | CL                                                                                   | Protein | X-ray   | 2009-05-05 |            |
| F           | 159 | 111068.44 | 18206.30  | 35.45    | (3R)-hydroxymyristoyl-acylprotein<br>dehydratase | Lyase                                            | Chloride ion                                                                          | CL                                                                                   | Protein | X-ray   | 2009-05-05 |            |
| <b>3DOZ</b> | A   | 159       | 111157.34 | 18206.30 | 120.15                                           | (3R)-hydroxymyristoyl-acylprotein<br>dehydratase | Lyase                                                                                 | Benzamidine                                                                          | BEN     | Protein | X-ray      | 2009-05-05 |
|             | A   | 159       | 111157.34 | 18206.30 | 35.45                                            | (3R)-hydroxymyristoyl-acylprotein<br>dehydratase | Lyase                                                                                 | Chloride ion                                                                         | CL      | Protein | X-ray      | 2009-05-05 |
|             | B   | 159       | 111157.34 | 18206.30 | 492.95                                           | (3R)-hydroxymyristoyl-acylprotein<br>dehydratase | Lyase                                                                                 | 3-bromo-n'-[(1e)-(3,5-dibromo-2,4-<br>dihydroxyphenyl)methylidene]benzohy<br>drazide | 3BE     | Protein | X-ray      | 2009-05-05 |

---

|             |   |     |           |          |        |                                                  |       |                                                                                            |     |         |       |            |
|-------------|---|-----|-----------|----------|--------|--------------------------------------------------|-------|--------------------------------------------------------------------------------------------|-----|---------|-------|------------|
|             | B | 159 | 111157.34 | 18206.30 | 120.15 | (3R)-hydroxymyristoyl-acylprotein<br>dehydratase | Lyase | Benzamidine                                                                                | BEN | Protein | X-ray | 2009-05-05 |
|             | B | 159 | 111157.34 | 18206.30 | 35.45  | (3R)-hydroxymyristoyl-acylprotein<br>dehydratase | Lyase | Chloride ion                                                                               | CL  | Protein | X-ray | 2009-05-05 |
|             | C | 159 | 111157.34 | 18206.30 | 492.95 | (3R)-hydroxymyristoyl-acylprotein<br>dehydratase | Lyase | 3-bromo-n'-[(1e)-(3,5-dibromo-2,4-<br>dihydroxyphenyl)methylidene]benzohy<br>drazide       | 3BE | Protein | X-ray | 2009-05-05 |
|             | C | 159 | 111157.34 | 18206.30 | 120.15 | (3R)-hydroxymyristoyl-acylprotein<br>dehydratase | Lyase | Benzamidine                                                                                | BEN | Protein | X-ray | 2009-05-05 |
|             | C | 159 | 111157.34 | 18206.30 | 35.45  | (3R)-hydroxymyristoyl-acylprotein<br>dehydratase | Lyase | Chloride ion                                                                               | CL  | Protein | X-ray | 2009-05-05 |
|             | D | 159 | 111157.34 | 18206.30 | 35.45  | (3R)-hydroxymyristoyl-acylprotein<br>dehydratase | Lyase | Chloride ion                                                                               | CL  | Protein | X-ray | 2009-05-05 |
|             | E | 159 | 111157.34 | 18206.30 | 35.45  | (3R)-hydroxymyristoyl-acylprotein<br>dehydratase | Lyase | Chloride ion                                                                               | CL  | Protein | X-ray | 2009-05-05 |
|             | F | 159 | 111157.34 | 18206.30 | 35.45  | (3R)-hydroxymyristoyl-acylprotein<br>dehydratase | Lyase | Chloride ion                                                                               | CL  | Protein | X-ray | 2009-05-05 |
| <b>3DP0</b> | A | 159 | 110755.71 | 18206.30 | 120.15 | (3R)-hydroxymyristoyl-acylprotein<br>dehydratase | Lyase | Benzamidine                                                                                | BEN | Protein | X-ray | 2009-05-05 |
|             | A | 159 | 110755.71 | 18206.30 | 35.45  | (3R)-hydroxymyristoyl-acylprotein<br>dehydratase | Lyase | Chloride ion                                                                               | CL  | Protein | X-ray | 2009-05-05 |
|             | B | 159 | 110755.71 | 18206.30 | 464.11 | (3R)-hydroxymyristoyl-acylprotein<br>dehydratase | Lyase | N'-[(1e)-(3,5-dibromo-2,4-<br>dihydroxyphenyl)methylidene]naphthal<br>ene-2-carbohydrazide | 2BC | Protein | X-ray | 2009-05-05 |
|             | B | 159 | 110755.71 | 18206.30 | 120.15 | (3R)-hydroxymyristoyl-acylprotein<br>dehydratase | Lyase | Benzamidine                                                                                | BEN | Protein | X-ray | 2009-05-05 |
|             | B | 159 | 110755.71 | 18206.30 | 35.45  | (3R)-hydroxymyristoyl-acylprotein<br>dehydratase | Lyase | Chloride ion                                                                               | CL  | Protein | X-ray | 2009-05-05 |
|             | C | 159 | 110755.71 | 18206.30 | 120.15 | (3R)-hydroxymyristoyl-acylprotein<br>dehydratase | Lyase | Benzamidine                                                                                | BEN | Protein | X-ray | 2009-05-05 |
|             | C | 159 | 110755.71 | 18206.30 | 35.45  | (3R)-hydroxymyristoyl-acylprotein                | Lyase | Chloride ion                                                                               | CL  | Protein | X-ray | 2009-05-05 |

|             |   |     |           |          |             |                                   |       |                                                                                |     |         |       |            |
|-------------|---|-----|-----------|----------|-------------|-----------------------------------|-------|--------------------------------------------------------------------------------|-----|---------|-------|------------|
|             |   |     |           |          | dehydratase |                                   |       |                                                                                |     |         |       |            |
|             | D | 159 | 110755.71 | 18206.30 | 35.45       | (3R)-hydroxymyristoyl-acylprotein | Lyase | Chloride ion                                                                   | CL  | Protein | X-ray | 2009-05-05 |
|             |   |     |           |          | dehydratase |                                   |       |                                                                                |     |         |       |            |
|             | E | 159 | 110755.71 | 18206.30 | 120.15      | (3R)-hydroxymyristoyl-acylprotein | Lyase | Benzamidine                                                                    | BEN | Protein | X-ray | 2009-05-05 |
|             |   |     |           |          | dehydratase |                                   |       |                                                                                |     |         |       |            |
|             | E | 159 | 110755.71 | 18206.30 | 35.45       | (3R)-hydroxymyristoyl-acylprotein | Lyase | Chloride ion                                                                   | CL  | Protein | X-ray | 2009-05-05 |
|             |   |     |           |          | dehydratase |                                   |       |                                                                                |     |         |       |            |
|             | F | 159 | 110755.71 | 18206.30 | 35.45       | (3R)-hydroxymyristoyl-acylprotein | Lyase | Chloride ion                                                                   | CL  | Protein | X-ray | 2009-05-05 |
|             |   |     |           |          | dehydratase |                                   |       |                                                                                |     |         |       |            |
| <b>3DP1</b> | A | 159 | 110939.45 | 18206.30 | 35.45       | (3R)-hydroxymyristoyl-acylprotein | Lyase | Chloride ion                                                                   | CL  | Protein | X-ray | 2009-05-05 |
|             |   |     |           |          | dehydratase |                                   |       |                                                                                |     |         |       |            |
|             | B | 159 | 110939.45 | 18206.30 | 444.08      | (3R)-hydroxymyristoyl-acylprotein | Lyase | N'-[(1e)-(3,5-dibromo-2,4-dihydroxyphenyl)methylidene]-4-methoxybenzohydrazide | 2RB | Protein | X-ray | 2009-05-05 |
|             |   |     |           |          | dehydratase |                                   |       |                                                                                |     |         |       |            |
|             | B | 159 | 110939.45 | 18206.30 | 120.15      | (3R)-hydroxymyristoyl-acylprotein | Lyase | Benzamidine                                                                    | BEN | Protein | X-ray | 2009-05-05 |
|             |   |     |           |          | dehydratase |                                   |       |                                                                                |     |         |       |            |
|             | B | 159 | 110939.45 | 18206.30 | 35.45       | (3R)-hydroxymyristoyl-acylprotein | Lyase | Chloride ion                                                                   | CL  | Protein | X-ray | 2009-05-05 |
|             |   |     |           |          | dehydratase |                                   |       |                                                                                |     |         |       |            |
|             | C | 159 | 110939.45 | 18206.30 | 444.08      | (3R)-hydroxymyristoyl-acylprotein | Lyase | N'-[(1e)-(3,5-dibromo-2,4-dihydroxyphenyl)methylidene]-4-methoxybenzohydrazide | 2RB | Protein | X-ray | 2009-05-05 |
|             |   |     |           |          | dehydratase |                                   |       |                                                                                |     |         |       |            |
|             | C | 159 | 110939.45 | 18206.30 | 35.45       | (3R)-hydroxymyristoyl-acylprotein | Lyase | Chloride ion                                                                   | CL  | Protein | X-ray | 2009-05-05 |
|             |   |     |           |          | dehydratase |                                   |       |                                                                                |     |         |       |            |
|             | D | 159 | 110939.45 | 18206.30 | 120.15      | (3R)-hydroxymyristoyl-acylprotein | Lyase | Benzamidine                                                                    | BEN | Protein | X-ray | 2009-05-05 |
|             |   |     |           |          | dehydratase |                                   |       |                                                                                |     |         |       |            |
|             | D | 159 | 110939.45 | 18206.30 | 35.45       | (3R)-hydroxymyristoyl-acylprotein | Lyase | Chloride ion                                                                   | CL  | Protein | X-ray | 2009-05-05 |
|             |   |     |           |          | dehydratase |                                   |       |                                                                                |     |         |       |            |
|             | E | 159 | 110939.45 | 18206.30 | 120.15      | (3R)-hydroxymyristoyl-acylprotein | Lyase | Benzamidine                                                                    | BEN | Protein | X-ray | 2009-05-05 |
|             |   |     |           |          | dehydratase |                                   |       |                                                                                |     |         |       |            |
|             | E | 159 | 110939.45 | 18206.30 | 35.45       | (3R)-hydroxymyristoyl-acylprotein | Lyase | Chloride ion                                                                   | CL  | Protein | X-ray | 2009-05-05 |
|             |   |     |           |          | dehydratase |                                   |       |                                                                                |     |         |       |            |

|             |   |     |           |          |        |                                                  |       |                                                                                      |     |         |       |            |
|-------------|---|-----|-----------|----------|--------|--------------------------------------------------|-------|--------------------------------------------------------------------------------------|-----|---------|-------|------------|
|             | F | 159 | 110939.45 | 18206.30 | 120.15 | (3R)-hydroxymyristoyl-acylprotein<br>dehydratase | Lyase | Benzamidine                                                                          | BEN | Protein | X-ray | 2009-05-05 |
|             | F | 159 | 110939.45 | 18206.30 | 35.45  | (3R)-hydroxymyristoyl-acylprotein<br>dehydratase | Lyase | Chloride ion                                                                         | CL  | Protein | X-ray | 2009-05-05 |
| <b>3DP2</b> | A | 159 | 111157.34 | 18206.30 | 120.15 | (3R)-hydroxymyristoyl-acylprotein<br>dehydratase | Lyase | Benzamidine                                                                          | BEN | Protein | X-ray | 2009-05-05 |
|             | A | 159 | 111157.34 | 18206.30 | 35.45  | (3R)-hydroxymyristoyl-acylprotein<br>dehydratase | Lyase | Chloride ion                                                                         | CL  | Protein | X-ray | 2009-05-05 |
|             | B | 159 | 111157.34 | 18206.30 | 492.95 | (3R)-hydroxymyristoyl-acylprotein<br>dehydratase | Lyase | 4-bromo-n'-[(1e)-(3,5-dibromo-2,4-<br>dihydroxyphenyl)methylidene]benzohy<br>drazide | 4BE | Protein | X-ray | 2009-05-05 |
|             | B | 159 | 111157.34 | 18206.30 | 120.15 | (3R)-hydroxymyristoyl-acylprotein<br>dehydratase | Lyase | Benzamidine                                                                          | BEN | Protein | X-ray | 2009-05-05 |
|             | B | 159 | 111157.34 | 18206.30 | 35.45  | (3R)-hydroxymyristoyl-acylprotein<br>dehydratase | Lyase | Chloride ion                                                                         | CL  | Protein | X-ray | 2009-05-05 |
|             | C | 159 | 111157.34 | 18206.30 | 492.95 | (3R)-hydroxymyristoyl-acylprotein<br>dehydratase | Lyase | 4-bromo-n'-[(1e)-(3,5-dibromo-2,4-<br>dihydroxyphenyl)methylidene]benzohy<br>drazide | 4BE | Protein | X-ray | 2009-05-05 |
|             | C | 159 | 111157.34 | 18206.30 | 35.45  | (3R)-hydroxymyristoyl-acylprotein<br>dehydratase | Lyase | Chloride ion                                                                         | CL  | Protein | X-ray | 2009-05-05 |
|             | D | 159 | 111157.34 | 18206.30 | 120.15 | (3R)-hydroxymyristoyl-acylprotein<br>dehydratase | Lyase | Benzamidine                                                                          | BEN | Protein | X-ray | 2009-05-05 |
|             | D | 159 | 111157.34 | 18206.30 | 35.45  | (3R)-hydroxymyristoyl-acylprotein<br>dehydratase | Lyase | Chloride ion                                                                         | CL  | Protein | X-ray | 2009-05-05 |
|             | E | 159 | 111157.34 | 18206.30 | 120.15 | (3R)-hydroxymyristoyl-acylprotein<br>dehydratase | Lyase | Benzamidine                                                                          | BEN | Protein | X-ray | 2009-05-05 |
|             | E | 159 | 111157.34 | 18206.30 | 35.45  | (3R)-hydroxymyristoyl-acylprotein<br>dehydratase | Lyase | Chloride ion                                                                         | CL  | Protein | X-ray | 2009-05-05 |
|             | F | 159 | 111157.34 | 18206.30 | 35.45  | (3R)-hydroxymyristoyl-acylprotein<br>dehydratase | Lyase | Chloride ion                                                                         | CL  | Protein | X-ray | 2009-05-05 |
| <b>3DP3</b> | A | 159 | 111111.77 | 18206.30 | 470.16 | (3R)-hydroxymyristoyl-acylprotein                | Lyase | 4-tert-butyl-n'-[(1e)-(3,5-dibromo-2,4-                                              | 4BB | Protein | X-ray | 2009-05-05 |

| dehydratase |     |           |           |          |                                               | dihydroxyphenyl)methylidene]benzohydrate      |                                                                                 |     |         |       |            |
|-------------|-----|-----------|-----------|----------|-----------------------------------------------|-----------------------------------------------|---------------------------------------------------------------------------------|-----|---------|-------|------------|
| A           | 159 | 111111.77 | 18206.30  | 120.15   | (3R)-hydroxymyristoyl-acylprotein dehydratase | Lyase                                         | Benzamidine                                                                     | BEN | Protein | X-ray | 2009-05-05 |
| A           | 159 | 111111.77 | 18206.30  | 35.45    | (3R)-hydroxymyristoyl-acylprotein dehydratase | Lyase                                         | Chloride ion                                                                    | CL  | Protein | X-ray | 2009-05-05 |
| B           | 159 | 111111.77 | 18206.30  | 120.15   | (3R)-hydroxymyristoyl-acylprotein dehydratase | Lyase                                         | Benzamidine                                                                     | BEN | Protein | X-ray | 2009-05-05 |
| B           | 159 | 111111.77 | 18206.30  | 35.45    | (3R)-hydroxymyristoyl-acylprotein dehydratase | Lyase                                         | Chloride ion                                                                    | CL  | Protein | X-ray | 2009-05-05 |
| C           | 159 | 111111.77 | 18206.30  | 470.16   | (3R)-hydroxymyristoyl-acylprotein dehydratase | Lyase                                         | 4-tert-butyl-n'-[(1e)-(3,5-dibromo-2,4-dihydroxyphenyl)methylidene]benzohydrate | 4BB | Protein | X-ray | 2009-05-05 |
| C           | 159 | 111111.77 | 18206.30  | 120.15   | (3R)-hydroxymyristoyl-acylprotein dehydratase | Lyase                                         | Benzamidine                                                                     | BEN | Protein | X-ray | 2009-05-05 |
| C           | 159 | 111111.77 | 18206.30  | 35.45    | (3R)-hydroxymyristoyl-acylprotein dehydratase | Lyase                                         | Chloride ion                                                                    | CL  | Protein | X-ray | 2009-05-05 |
| D           | 159 | 111111.77 | 18206.30  | 35.45    | (3R)-hydroxymyristoyl-acylprotein dehydratase | Lyase                                         | Chloride ion                                                                    | CL  | Protein | X-ray | 2009-05-05 |
| E           | 159 | 111111.77 | 18206.30  | 120.15   | (3R)-hydroxymyristoyl-acylprotein dehydratase | Lyase                                         | Benzamidine                                                                     | BEN | Protein | X-ray | 2009-05-05 |
| E           | 159 | 111111.77 | 18206.30  | 35.45    | (3R)-hydroxymyristoyl-acylprotein dehydratase | Lyase                                         | Chloride ion                                                                    | CL  | Protein | X-ray | 2009-05-05 |
| F           | 159 | 111111.77 | 18206.30  | 35.45    | (3R)-hydroxymyristoyl-acylprotein dehydratase | Lyase                                         | Chloride ion                                                                    | CL  | Protein | X-ray | 2009-05-05 |
| <b>3ED0</b> | A   | 159       | 110832.08 | 18206.30 | 120.15                                        | (3R)-hydroxymyristoyl-acylprotein dehydratase | Benzamidine                                                                     | BEN | Protein | X-ray | 2009-07-21 |
|             | A   | 159       | 110832.08 | 18206.30 | 35.45                                         | (3R)-hydroxymyristoyl-acylprotein dehydratase | Chloride ion                                                                    | CL  | Protein | X-ray | 2009-07-21 |
|             | A   | 159       | 110832.08 | 18206.30 | 270.24                                        | (3R)-hydroxymyristoyl-acylprotein dehydratase | 3-methyl-1,6,8-trihydroxyanthraquinone                                          | EMO | Protein | X-ray | 2009-07-21 |

|             |   |     |           |          |        |                                               |                |                                        |     |         |       |            |                   |
|-------------|---|-----|-----------|----------|--------|-----------------------------------------------|----------------|----------------------------------------|-----|---------|-------|------------|-------------------|
|             | B | 159 | 110832.08 | 18206.30 | 120.15 | (3R)-hydroxymyristoyl-acylprotein dehydratase | Lyase          | Benzamidine                            | BEN | Protein | X-ray | 2009-07-21 |                   |
|             | B | 159 | 110832.08 | 18206.30 | 35.45  | (3R)-hydroxymyristoyl-acylprotein dehydratase | Lyase          | Chloride ion                           | CL  | Protein | X-ray | 2009-07-21 |                   |
|             | C | 159 | 110832.08 | 18206.30 | 35.45  | (3R)-hydroxymyristoyl-acylprotein dehydratase | Lyase          | Chloride ion                           | CL  | Protein | X-ray | 2009-07-21 |                   |
|             | C | 159 | 110832.08 | 18206.30 | 270.24 | (3R)-hydroxymyristoyl-acylprotein dehydratase | Lyase          | 3-methyl-1,6,8-trihydroxyanthraquinone | EMO | Protein | X-ray | 2009-07-21 |                   |
|             | D | 159 | 110832.08 | 18206.30 | 120.15 | (3R)-hydroxymyristoyl-acylprotein dehydratase | Lyase          | Benzamidine                            | BEN | Protein | X-ray | 2009-07-21 |                   |
|             | D | 159 | 110832.08 | 18206.30 | 35.45  | (3R)-hydroxymyristoyl-acylprotein dehydratase | Lyase          | Chloride ion                           | CL  | Protein | X-ray | 2009-07-21 |                   |
|             | E | 159 | 110832.08 | 18206.30 | 120.15 | (3R)-hydroxymyristoyl-acylprotein dehydratase | Lyase          | Benzamidine                            | BEN | Protein | X-ray | 2009-07-21 |                   |
|             | E | 159 | 110832.08 | 18206.30 | 35.45  | (3R)-hydroxymyristoyl-acylprotein dehydratase | Lyase          | Chloride ion                           | CL  | Protein | X-ray | 2009-07-21 |                   |
|             | F | 159 | 110832.08 | 18206.30 | 35.45  | (3R)-hydroxymyristoyl-acylprotein dehydratase | Lyase          | Chloride ion                           | CL  | Protein | X-ray | 2009-07-21 |                   |
| <b>3EGM</b> | A | 181 | 126613.58 | 20916.60 | 55.85  | Ferritin                                      | Oxidoreductase | Fe (iii) ion                           | FE  | Protein | X-ray | 2009-07-28 |                   |
|             | A | 181 | 126613.58 | 20916.60 | 92.09  | Ferritin                                      | Oxidoreductase | Glycerol                               | GOL | Protein | X-ray | 2009-07-28 |                   |
|             | B | 181 | 126613.58 | 20916.60 | 55.85  | Ferritin                                      | Oxidoreductase | Fe (iii) ion                           | FE  | Protein | X-ray | 2009-07-28 |                   |
|             | B | 181 | 126613.58 | 20916.60 | 92.09  | Ferritin                                      | Oxidoreductase | Glycerol                               | GOL | Protein | X-ray | 2009-07-28 |                   |
|             | C | 181 | 126613.58 | 20916.60 | 55.85  | Ferritin                                      | Oxidoreductase | Fe (iii) ion                           | FE  | Protein | X-ray | 2009-07-28 |                   |
|             | D | 181 | 126613.58 | 20916.60 | 55.85  | Ferritin                                      | Oxidoreductase | Fe (iii) ion                           | FE  | Protein | X-ray | 2009-07-28 |                   |
|             | D | 181 | 126613.58 | 20916.60 | 92.09  | Ferritin                                      | Oxidoreductase | Glycerol                               | GOL | Protein | X-ray | 2009-07-28 |                   |
|             | E | 181 | 126613.58 | 20916.60 | 55.85  | Ferritin                                      | Oxidoreductase | Fe (iii) ion                           | FE  | Protein | X-ray | 2009-07-28 |                   |
| <b>3EZS</b> | F | 181 | 126613.58 | 20916.60 | 55.85  | Ferritin                                      | Oxidoreductase | Fe (iii) ion                           | FE  | Protein | X-ray | 2009-07-28 |                   |
|             | A | 376 | 87435.69  | 43374.60 | 62.07  | Aminotransferase aspb                         | Transferase    | 1,2-ethanediol                         | EDO | Protein | X-ray | 2008-11-18 | JCSG <sup>8</sup> |
|             | A | 376 | 87435.69  | 43374.60 | 196.11 | Aminotransferase aspb                         | Transferase    | Selenomethionine                       | MSE | Protein | X-ray | 2008-11-18 | JCSG              |
|             | A | 376 | 87435.69  | 43374.60 | 94.97  | Aminotransferase aspb                         | Transferase    | Phosphate ion                          | PO4 | Protein | X-ray | 2008-11-18 | JCSG              |
|             | B | 376 | 87435.69  | 43374.60 | 62.07  | Aminotransferase aspb                         | Transferase    | 1,2-ethanediol                         | EDO | Protein | X-ray | 2008-11-18 | JCSG              |

|             |   |     |           |          |        |                                                             |                      |                                                                   |     |         |       |            |      |
|-------------|---|-----|-----------|----------|--------|-------------------------------------------------------------|----------------------|-------------------------------------------------------------------|-----|---------|-------|------------|------|
| <b>3F42</b> | B | 376 | 87435.69  | 43374.60 | 196.11 | Aminotransferase aspb                                       | Transferase          | Selenomethionine                                                  | MSE | Protein | X-ray | 2008-11-18 | JCSG |
|             | B | 376 | 87435.69  | 43374.60 | 94.97  | Aminotransferase aspb                                       | Transferase          | Phosphate ion                                                     | PO4 | Protein | X-ray | 2008-11-18 | JCSG |
|             | A | 99  | 22671.87  | 11211.80 | 62.07  | Protein HP0035                                              | SG, unknown function | 1,2-ethanediol                                                    | EDO | Protein | X-ray | 2008-11-18 | MCSG |
|             | A | 99  | 22671.87  | 11211.80 | 196.11 | Protein HP0035                                              | SG, unknown function | Selenomethionine                                                  | MSE | Protein | X-ray | 2008-11-18 | MCSG |
|             | B | 99  | 22671.87  | 11211.80 | 62.07  | Protein HP0035                                              | SG, unknown function | 1,2-ethanediol                                                    | EDO | Protein | X-ray | 2008-11-18 | MCSG |
|             | B | 99  | 22671.87  | 11211.80 | 196.11 | Protein HP0035                                              | SG, unknown function | Selenomethionine                                                  | MSE | Protein | X-ray | 2008-11-18 | MCSG |
| <b>3FC3</b> | A | 200 | 52768.99  | 22768.40 | 22.99  | Restriction endonuclease Hpy99I                             | Hydrolase/dna        | Sodium ion                                                        | NA  | Protein | X-ray | 2009-03-31 |      |
|             |   |     |           |          |        |                                                             |                      |                                                                   |     | DNA     |       |            |      |
|             | A | 200 | 52768.99  | 22768.40 | 194.23 | Restriction endonuclease Hpy99I                             | Hydrolase/dna        | Tetraethylene glycol                                              | PG4 | Protein | X-ray | 2009-03-31 |      |
|             |   |     |           |          |        |                                                             |                      |                                                                   |     | DNA     |       |            |      |
|             | A | 200 | 52768.99  | 22768.40 | 65.38  | Restriction endonuclease Hpy99I                             | Hydrolase/dna        | Zinc ion                                                          | ZN  | Protein | X-ray | 2009-03-31 |      |
|             |   |     |           |          |        |                                                             |                      |                                                                   |     | DNA     |       |            |      |
| <b>3FNM</b> | B | 200 | 52768.99  | 22768.40 | 22.99  | Restriction endonuclease Hpy99I                             | Hydrolase/dna        | Sodium ion                                                        | NA  | Protein | X-ray | 2009-03-31 |      |
|             |   |     |           |          |        |                                                             |                      |                                                                   |     | DNA     |       |            |      |
|             | B | 200 | 52768.99  | 22768.40 | 65.38  | Restriction endonuclease Hpy99I                             | Hydrolase/dna        | Zinc ion                                                          | ZN  | Protein | X-ray | 2009-03-31 |      |
|             |   |     |           |          |        |                                                             |                      |                                                                   |     | DNA     |       |            |      |
|             | C | 11  | 52768.99  | 3358.24  |        | 5'-<br>(*dcp*ntp*dcp*dgp*dap*dcp*dgp*ntp<br>*dap*dgp*da)-3' | Hydrolase/dna        |                                                                   |     | Protein | X-ray | 2009-03-31 |      |
|             |   |     |           |          |        |                                                             |                      |                                                                   |     | DNA     |       |            |      |
| <b>3FX7</b> | D | 11  | 52768.99  | 3349.23  |        | 5'-<br>(*ntp*dap*dcp*dgp*ntp*dcp*dgp*dap<br>*dgp*ntp*dc)-3' | Hydrolase/dna        |                                                                   |     | Protein | X-ray | 2009-03-31 |      |
|             |   |     |           |          |        |                                                             |                      |                                                                   |     | DNA     |       |            |      |
|             | A | 377 | 122333.35 | 40577.80 |        | Gamma-glutamyltranspeptidase (Ggt)<br>Large subunit         | Transferase          |                                                                   |     | Protein | X-ray | 2009-05-19 |      |
|             | B | 188 | 122333.35 | 20410.30 | 178.57 | Gamma-glutamyltranspeptidase (Ggt)<br>Small subunit         | Transferase          | (2s)-amino[(5s)-3-chloro-4,5-<br>dihydroisoxazol-5-yl]acetic acid | AVN | Protein | X-ray | 2009-05-19 |      |
|             | C | 377 | 122333.35 | 40577.80 |        | Gamma-glutamyltranspeptidase (Ggt)<br>Large subunit         | Transferase          |                                                                   |     | Protein | X-ray | 2009-05-19 |      |
|             | D | 188 | 122333.35 | 20410.30 | 178.57 | Gamma-glutamyltranspeptidase (Ggt)<br>Small subunit         | Transferase          | (2s)-amino[(5s)-3-chloro-4,5-<br>dihydroisoxazol-5-yl]acetic acid | AVN | Protein | X-ray | 2009-05-19 |      |
| <b>3FX7</b> | A | 94  | 23207.80  | 11603.90 |        | Putativeprotein                                             | Unknown function     |                                                                   |     | Protein | X-ray | 2009-09-01 |      |

[illegible]

|             |   |     |          |          |        |                                                             |                       |                           |     |                |       |            |
|-------------|---|-----|----------|----------|--------|-------------------------------------------------------------|-----------------------|---------------------------|-----|----------------|-------|------------|
|             | A | 200 | 52813.04 | 22768.40 | 65.38  | Restriction endonuclease Hpy99I                             | Hydrolase/dna         | Zinc ion                  | ZN  | Protein<br>DNA | X-ray | 2009-04-28 |
|             | B | 200 | 52813.04 | 22768.40 | 22.99  | Restriction endonuclease Hpy99I                             | Hydrolase/dna         | Sodium ion                | NA  | Protein<br>DNA | X-ray | 2009-04-28 |
|             | B | 200 | 52813.04 | 22768.40 | 65.38  | Restriction endonuclease Hpy99I                             | Hydrolase/dna         | Zinc ion                  | ZN  | Protein<br>DNA | X-ray | 2009-04-28 |
|             | C | 11  | 52813.04 | 3358.24  |        | 5'-<br>(*dcp*ctp*dcp*dgp*dap*dcp*dgp*ctp<br>*dap*dgp*da)-3' | Hydrolase/dna         |                           |     | Protein<br>DNA | X-ray | 2009-04-28 |
|             | D | 11  | 52813.04 | 3349.23  |        | 5'-<br>(*ctp*dap*dcp*dgp*ctp*dcp*dgp*dap<br>*dgp*ctp*dc)-3' | Hydrolase/dna         |                           |     | Protein<br>DNA | X-ray | 2009-04-28 |
| <b>3GUQ</b> | A | 166 | 19047.00 | 19047.00 |        | Putativeprotein                                             | Toxin                 |                           |     | Protein        | X-ray | 2009-09-22 |
| <b>3GWG</b> | A | 129 | 14585.43 | 14344.70 | 24.31  | Chemotaxis protein chey homolog                             | Signaling protein     | Magnesium ion             | MG  | Protein        | X-ray | 2010-03-09 |
|             | A | 129 | 14585.43 | 14344.70 | 96.06  | Chemotaxis protein chey homolog                             | Signaling protein     | Sulfate ion               | SO4 | Protein        | X-ray | 2010-03-09 |
| <b>3GXV</b> | A | 123 | 34049.48 | 14291.50 |        | Replicative DNA helicase                                    | Hydrolase/replication |                           |     | Protein        | X-ray | 2010-01-26 |
|             | B | 123 | 34049.48 | 14291.50 |        | Replicative DNA helicase                                    | Hydrolase/replication |                           |     | Protein        | X-ray | 2010-01-26 |
|             | C | 22  | 34049.48 | 2490.00  |        | Replicative DNA helicase                                    | Hydrolase/replication |                           |     | Protein        | X-ray | 2010-01-26 |
|             | D | 26  | 34049.48 | 2976.48  |        | Replicative DNA helicase                                    | Hydrolase/replication |                           |     | Protein        | X-ray | 2010-01-26 |
| <b>3H1E</b> | A | 129 | 14555.38 | 14344.70 | 66.01  | Chemotaxis protein chey homolog                             | Signaling protein     | Beryllium trifluoride ion | BEF | Protein        | X-ray | 2010-03-09 |
|             | A | 129 | 14555.38 | 14344.70 | 24.31  | Chemotaxis protein chey homolog                             | Signaling protein     | Magnesium ion             | MG  | Protein        | X-ray | 2010-03-09 |
|             | A | 129 | 14555.38 | 14344.70 | 96.06  | Chemotaxis protein chey homolog                             | Signaling protein     | Sulfate ion               | SO4 | Protein        | X-ray | 2010-03-09 |
| <b>3H1F</b> | A | 129 | 14517.12 | 14300.70 | 24.31  | Chemotaxis protein chey homolog                             | Signaling protein     | Magnesium ion             | MG  | Protein        | X-ray | 2010-03-09 |
|             | A | 129 | 14517.12 | 14300.70 | 96.06  | Chemotaxis protein chey homolog                             | Signaling protein     | Sulfate ion               | SO4 | Protein        | X-ray | 2010-03-09 |
| <b>3H1G</b> | A | 129 | 14555.43 | 14314.70 | 24.31  | Chemotaxis protein chey homolog                             | Signaling protein     | Magnesium ion             | MG  | Protein        | X-ray | 2010-03-09 |
|             | A | 129 | 14555.43 | 14314.70 | 96.06  | Chemotaxis protein chey homolog                             | Signaling protein     | Sulfate ion               | SO4 | Protein        | X-ray | 2010-03-09 |
| <b>3HPE</b> | A | 164 | 38000.38 | 18662.60 | 337.59 | Conservedprotein                                            | Transport protein     | (13z)-docos-13-enamide    | ERU | Protein        | X-ray | 2010-04-14 |
|             | B | 164 | 38000.38 | 18662.60 | 337.59 | Conservedprotein                                            | Transport protein     | (13z)-docos-13-enamide    | ERU | Protein        | X-ray | 2010-04-14 |
| <b>3HR7</b> | A | 168 | 38723.12 | 19265.50 | 96.06  | Shikimate kinase                                            | Transferase           | Sulfate ion               | SO4 | Protein        | X-ray | 2010-06-16 |
|             | B | 168 | 38723.12 | 19265.50 | 96.06  | Shikimate kinase                                            | Transferase           | Sulfate ion               | SO4 | Protein        | X-ray | 2010-06-16 |
| <b>3HVM</b> | A | 330 | 37614.50 | 37614.50 |        | Agmatine deiminase                                          | Hydrolase             |                           |     | Protein        | X-ray | 2010-01-19 |

|      |   |     |           |          |                                                   |                         |                  |                 |         |         |            |            |
|------|---|-----|-----------|----------|---------------------------------------------------|-------------------------|------------------|-----------------|---------|---------|------------|------------|
| 3IBX | A | 221 | 51022.20  | 25511.10 | Putative thiaminase II                            | Hydrolase               |                  |                 | Protein | X-ray   | 2009-11-17 |            |
|      | D | 221 | 51022.20  | 25511.10 | Putative thiaminase II                            | Hydrolase               |                  |                 | Protein | X-ray   | 2009-11-17 |            |
| 3IEC | A | 319 | 201373.20 | 36920.10 | Serine/threonine-protein kinase<br>MARK2          | Signaling protein/toxin |                  |                 | Protein | X-ray   | 2009-12-08 |            |
|      | B | 319 | 201373.20 | 36920.10 | Serine/threonine-protein kinase<br>MARK2          | Signaling protein/toxin |                  |                 | Protein | X-ray   | 2009-12-08 |            |
|      | C | 319 | 201373.20 | 36920.10 | Serine/threonine-protein kinase<br>MARK2          | Signaling protein/toxin |                  |                 | Protein | X-ray   | 2009-12-08 |            |
|      | D | 319 | 201373.20 | 36920.10 | Serine/threonine-protein kinase<br>MARK2          | Signaling protein/toxin |                  |                 | Protein | X-ray   | 2009-12-08 |            |
|      | E | 125 | 201373.20 | 13423.20 | Cytotoxicity-associated<br>immunodominant antigen | Signaling protein/toxin |                  |                 | Protein | X-ray   | 2009-12-08 |            |
|      | F | 125 | 201373.20 | 13423.20 | Cytotoxicity-associated<br>immunodominant antigen | Signaling protein/toxin |                  |                 | Protein | X-ray   | 2009-12-08 |            |
|      | G | 125 | 201373.20 | 13423.20 | Cytotoxicity-associated<br>immunodominant antigen | Signaling protein/toxin |                  |                 | Protein | X-ray   | 2009-12-08 |            |
|      | H | 125 | 201373.20 | 13423.20 | Cytotoxicity-associated<br>immunodominant antigen | Signaling protein/toxin |                  |                 | Protein | X-ray   | 2009-12-08 |            |
| 3IMP | A | 138 | 191540.41 | 15940.10 | Chemotaxis protein motb                           | Membrane protein        |                  |                 | Protein | X-ray   | 2010-08-04 |            |
|      | B | 138 | 191540.41 | 15940.10 | Chemotaxis protein motb                           | Membrane protein        |                  |                 | Protein | X-ray   | 2010-08-04 |            |
|      | C | 138 | 191540.41 | 15940.10 | Chemotaxis protein motb                           | Membrane protein        |                  |                 | Protein | X-ray   | 2010-08-04 |            |
|      | D | 138 | 191540.41 | 15940.10 | Chemotaxis protein motb                           | Membrane protein        |                  |                 | Protein | X-ray   | 2010-08-04 |            |
|      | E | 138 | 191540.41 | 15940.10 | Chemotaxis protein motb                           | Membrane protein        |                  |                 | Protein | X-ray   | 2010-08-04 |            |
|      | F | 138 | 191540.41 | 15940.10 | Chemotaxis protein motb                           | Membrane protein        |                  |                 | Protein | X-ray   | 2010-08-04 |            |
|      | G | 138 | 191540.41 | 15940.10 | 35.45                                             | Chemotaxis protein motb | Membrane protein | Chloride ion    | CL      | Protein | X-ray      | 2010-08-04 |
|      | G | 138 | 191540.41 | 15940.10 | 58.70                                             | Chemotaxis protein motb | Membrane protein | Nickel (ii) ion | NI      | Protein | X-ray      | 2010-08-04 |
|      | H | 138 | 191540.41 | 15940.10 | Chemotaxis protein motb                           | Membrane protein        |                  |                 | Protein | X-ray   | 2010-08-04 |            |
|      | I | 138 | 191540.41 | 15940.10 | Chemotaxis protein motb                           | Membrane protein        |                  |                 | Protein | X-ray   | 2010-08-04 |            |
|      | J | 138 | 191540.41 | 15940.10 | Chemotaxis protein motb                           | Membrane protein        |                  |                 | Protein | X-ray   | 2010-08-04 |            |
|      | K | 138 | 191540.41 | 15940.10 | 35.45                                             | Chemotaxis protein motb | Membrane protein | Chloride ion    | CL      | Protein | X-ray      | 2010-08-04 |
|      | K | 138 | 191540.41 | 15940.10 | 58.70                                             | Chemotaxis protein motb | Membrane protein | Nickel (ii) ion | NI      | Protein | X-ray      | 2010-08-04 |

|      |   |     |           |          |                                              |                                      |                  |                  |                                |         |         |            |            |         |
|------|---|-----|-----------|----------|----------------------------------------------|--------------------------------------|------------------|------------------|--------------------------------|---------|---------|------------|------------|---------|
| 3IQC | L | 138 | 191540.41 | 15940.10 | Chemotaxis protein motb                      |                                      | Membrane protein |                  |                                | Protein | X-ray   | 2010-08-04 |            |         |
|      | A | 131 | 29940.20  | 14970.10 | Flagellar protein                            |                                      | Chaperone        |                  |                                | Protein | X-ray   | 2010-06-30 |            |         |
|      | B | 131 | 29940.20  | 14970.10 | Flagellar protein                            |                                      | Chaperone        |                  |                                | Protein | X-ray   | 2010-06-30 |            |         |
| 3ISH | A | 311 | 103089.17 | 33577.50 | 785.56                                       | Thioredoxin reductase                |                  | Oxidoreductase   | Flavin-adenine dinucleotide    | FAD     | Protein | X-ray      | 2009-10-06 |         |
|      | B | 311 | 103089.17 | 33577.50 | 785.56                                       | Thioredoxin reductase                |                  | Oxidoreductase   | Flavin-adenine dinucleotide    | FAD     | Protein | X-ray      | 2009-10-06 |         |
|      | C | 311 | 103089.17 | 33577.50 | 785.56                                       | Thioredoxin reductase                |                  | Oxidoreductase   | Flavin-adenine dinucleotide    | FAD     | Protein | X-ray      | 2009-10-06 |         |
| 3JUI | A | 281 | 128348.80 | 32087.20 | UDP-glucose pyrophosphorylase (galu)         |                                      | Transferase      |                  |                                |         | Protein | X-ray      | 2010-03-31 |         |
|      | B | 281 | 128348.80 | 32087.20 | UDP-glucose pyrophosphorylase (galu)         |                                      | Transferase      |                  |                                |         | Protein | X-ray      | 2010-03-31 |         |
|      | C | 281 | 128348.80 | 32087.20 | UDP-glucose pyrophosphorylase (galu)         |                                      | Transferase      |                  |                                |         | Protein | X-ray      | 2010-03-31 |         |
|      | D | 281 | 128348.80 | 32087.20 | UDP-glucose pyrophosphorylase (galu)         |                                      | Transferase      |                  |                                |         | Protein | X-ray      | 2010-03-31 |         |
| 3JUK | A | 281 | 130905.68 | 32087.20 | 24.31                                        | UDP-glucose pyrophosphorylase (galu) |                  | Transferase      | Magnesium ion                  | MG      | Protein | X-ray      | 2010-03-31 |         |
|      | A | 281 | 130905.68 | 32087.20 | 566.30                                       | UDP-glucose pyrophosphorylase (galu) |                  | Transferase      | Uridine-5'-diphosphate-glucose | UPG     | Protein | X-ray      | 2010-03-31 |         |
|      | B | 281 | 130905.68 | 32087.20 | 24.31                                        | UDP-glucose pyrophosphorylase (galu) |                  | Transferase      | Magnesium ion                  | MG      | Protein | X-ray      | 2010-03-31 |         |
|      | B | 281 | 130905.68 | 32087.20 | 566.30                                       | UDP-glucose pyrophosphorylase (galu) |                  | Transferase      | Uridine-5'-diphosphate-glucose | UPG     | Protein | X-ray      | 2010-03-31 |         |
|      | C | 281 | 130905.68 | 32087.20 | 24.31                                        | UDP-glucose pyrophosphorylase (galu) |                  | Transferase      | Magnesium ion                  | MG      | Protein | X-ray      | 2010-03-31 |         |
|      | C | 281 | 130905.68 | 32087.20 | 566.30                                       | UDP-glucose pyrophosphorylase (galu) |                  | Transferase      | Uridine-5'-diphosphate-glucose | UPG     | Protein | X-ray      | 2010-03-31 |         |
|      | D | 281 | 130905.68 | 32087.20 | 24.31                                        | UDP-glucose pyrophosphorylase (galu) |                  | Transferase      | Magnesium ion                  | MG      | Protein | X-ray      | 2010-03-31 |         |
|      | D | 281 | 130905.68 | 32087.20 | 566.30                                       | UDP-glucose pyrophosphorylase (galu) |                  | Transferase      | Uridine-5'-diphosphate-glucose | UPG     | Protein | X-ray      | 2010-03-31 |         |
|      | A | 158 | 17989.70  | 17989.70 | Putativeprotein                              |                                      | Chaperone        |                  |                                |         | Protein | X-ray      | 2010-06-30 |         |
| 3KII | A | 131 | 70472.80  | 14970.10 | Flagellar protein                            |                                      | Chaperone        |                  |                                |         | Protein | X-ray      | 2010-06-30 |         |
|      | B | 131 | 70472.80  | 14970.10 | Flagellar protein                            |                                      | Chaperone        |                  |                                |         | Protein | X-ray      | 2010-06-30 |         |
|      | C | 178 | 70472.80  | 20266.30 | Putativeprotein                              |                                      | Chaperone        |                  |                                |         | Protein | X-ray      | 2010-06-30 |         |
|      | D | 178 | 70472.80  | 20266.30 | Putativeprotein                              |                                      | Chaperone        |                  |                                |         | Protein | X-ray      | 2010-06-30 |         |
|      | A | 475 | 52510.07  | 52415.10 | 196.11                                       | Carbohydrate kinase                  |                  | Transferase      | Selenomethionine               | MSE     | Protein | X-ray      | 2009-12-08 | NYSRCSG |
| 3KU7 | A | 475 | 52510.07  | 52415.10 | 94.97                                        | Carbohydrate kinase                  |                  | Transferase      | Phosphate ion                  | PO4     | Protein | X-ray      | 2009-12-08 | NYSRCSG |
|      | A | 80  | 18431.50  | 9215.75  | Cell division topological specificity factor |                                      | Cell cycle       |                  |                                |         | Protein | X-ray      | 2010-05-05 |         |
|      | B | 80  | 18431.50  | 9215.75  | Cell division topological specificity factor |                                      | Cell cycle       |                  |                                |         | Protein | X-ray      | 2010-05-05 |         |
| 3KWL | A | 514 | 60116.00  | 60116.00 | 196.11                                       | Uncharacterized protein              |                  | Unknown function | Selenomethionine               | MSE     | Protein | X-ray      | 2010-12-01 |         |
| 3L9Z | A | 170 | 19412.70  | 19412.70 | Ureaseprotein uree                           |                                      | Metalprotein     |                  |                                |         | Protein | X-ray      | 2010-08-25 | MKBSGI  |

|      |   |     |           |          |        |                                  |              |                     |     |         |       |            |         |
|------|---|-----|-----------|----------|--------|----------------------------------|--------------|---------------------|-----|---------|-------|------------|---------|
| 3LA0 | A | 170 | 77650.80  | 19412.70 |        | Ureaseprotein uree               | Metalprotein | Unknown atom or ion | UNX | Protein | X-ray | 2010-08-25 | MKBSGI  |
|      | B | 170 | 77650.80  | 19412.70 |        | Ureaseprotein uree               | Metalprotein |                     |     | Protein | X-ray | 2010-08-25 | MKBSGI  |
|      | C | 170 | 77650.80  | 19412.70 |        | Ureaseprotein uree               | Metalprotein |                     |     | Protein | X-ray | 2010-08-25 | MKBSGI  |
|      | D | 170 | 77650.80  | 19412.70 |        | Ureaseprotein uree               | Metalprotein |                     |     | Protein | X-ray | 2010-08-25 | MKBSGI  |
| 3LGH | A | 148 | 68940.71  | 17170.40 | 24.31  | Nickel-responsive regulator      | Metalprotein | Magnesium ion       | MG  | Protein | X-ray | 2010-09-15 |         |
|      | A | 148 | 68940.71  | 17170.40 | 58.70  | Nickel-responsive regulator      | Metalprotein | Nickel (ii) ion     | NI  | Protein | X-ray | 2010-09-15 |         |
|      | B | 148 | 68940.71  | 17170.40 | 58.70  | Nickel-responsive regulator      | Metalprotein | Nickel (ii) ion     | NI  | Protein | X-ray | 2010-09-15 |         |
|      | C | 148 | 68940.71  | 17170.40 | 58.70  | Nickel-responsive regulator      | Metalprotein | Nickel (ii) ion     | NI  | Protein | X-ray | 2010-09-15 |         |
|      | D | 148 | 68940.71  | 17170.40 | 58.70  | Nickel-responsive regulator      | Metalprotein | Nickel (ii) ion     | NI  | Protein | X-ray | 2010-09-15 |         |
| 3LLW | A | 311 | 142026.94 | 35290.60 | 96.06  | Geranyltranstransferase (ispa)   | Transferase  | Sulfate ion         | SO4 | Protein | X-ray | 2010-03-31 | NYSRCSG |
|      | B | 311 | 142026.94 | 35290.60 | 96.06  | Geranyltranstransferase (ispa)   | Transferase  | Sulfate ion         | SO4 | Protein | X-ray | 2010-03-31 | NYSRCSG |
|      | C | 311 | 142026.94 | 35290.60 | 96.06  | Geranyltranstransferase (ispa)   | Transferase  | Sulfate ion         | SO4 | Protein | X-ray | 2010-03-31 | NYSRCSG |
|      | D | 311 | 142026.94 | 35290.60 | 96.06  | Geranyltranstransferase (ispa)   | Transferase  | Sulfate ion         | SO4 | Protein | X-ray | 2010-03-31 | NYSRCSG |
| 3MIY | A | 217 | 98561.19  | 24565.60 | 35.45  | Phosphoserine phosphatase (serb) | Hydrolase    | Chloride ion        | CL  | Protein | X-ray | 2010-03-23 | NYSRCSG |
|      | A | 217 | 98561.19  | 24565.60 | 24.31  | Phosphoserine phosphatase (serb) | Hydrolase    | Magnesium ion       | MG  | Protein | X-ray | 2010-03-23 | NYSRCSG |
|      | A | 217 | 98561.19  | 24565.60 | 196.11 | Phosphoserine phosphatase (serb) | Hydrolase    | Selenomethionine    | MSE | Protein | X-ray | 2010-03-23 | NYSRCSG |
|      | B | 217 | 98561.19  | 24565.60 | 35.45  | Phosphoserine phosphatase (serb) | Hydrolase    | Chloride ion        | CL  | Protein | X-ray | 2010-03-23 | NYSRCSG |
|      | B | 217 | 98561.19  | 24565.60 | 24.31  | Phosphoserine phosphatase (serb) | Hydrolase    | Magnesium ion       | MG  | Protein | X-ray | 2010-03-23 | NYSRCSG |
|      | B | 217 | 98561.19  | 24565.60 | 196.11 | Phosphoserine phosphatase (serb) | Hydrolase    | Selenomethionine    | MSE | Protein | X-ray | 2010-03-23 | NYSRCSG |
|      | C | 217 | 98561.19  | 24565.60 | 35.45  | Phosphoserine phosphatase (serb) | Hydrolase    | Chloride ion        | CL  | Protein | X-ray | 2010-03-23 | NYSRCSG |
|      | C | 217 | 98561.19  | 24565.60 | 24.31  | Phosphoserine phosphatase (serb) | Hydrolase    | Magnesium ion       | MG  | Protein | X-ray | 2010-03-23 | NYSRCSG |
|      | C | 217 | 98561.19  | 24565.60 | 196.11 | Phosphoserine phosphatase (serb) | Hydrolase    | Selenomethionine    | MSE | Protein | X-ray | 2010-03-23 | NYSRCSG |
|      | D | 217 | 98561.19  | 24565.60 | 35.45  | Phosphoserine phosphatase (serb) | Hydrolase    | Chloride ion        | CL  | Protein | X-ray | 2010-03-23 | NYSRCSG |
|      | D | 217 | 98561.19  | 24565.60 | 24.31  | Phosphoserine phosphatase (serb) | Hydrolase    | Magnesium ion       | MG  | Protein | X-ray | 2010-03-23 | NYSRCSG |
|      | D | 217 | 98561.19  | 24565.60 | 196.11 | Phosphoserine phosphatase (serb) | Hydrolase    | Selenomethionine    | MSE | Protein | X-ray | 2010-03-23 | NYSRCSG |
| 3M2I | A | 67  | 44336.70  | 7389.45  |        | Probable tautomerase HP_0924     | Isomerase    |                     |     | Protein | X-ray | 2010-09-01 |         |
|      | B | 67  | 44336.70  | 7389.45  |        | Probable tautomerase HP_0924     | Isomerase    |                     |     | Protein | X-ray | 2010-09-01 |         |
|      | C | 67  | 44336.70  | 7389.45  |        | Probable tautomerase HP_0924     | Isomerase    |                     |     | Protein | X-ray | 2010-09-01 |         |
|      | D | 67  | 44336.70  | 7389.45  |        | Probable tautomerase HP_0924     | Isomerase    |                     |     | Protein | X-ray | 2010-09-01 |         |
|      | E | 67  | 44336.70  | 7389.45  |        | Probable tautomerase HP_0924     | Isomerase    |                     |     | Protein | X-ray | 2010-09-01 |         |
|      | F | 67  | 44336.70  | 7389.45  |        | Probable tautomerase HP_0924     | Isomerase    |                     |     | Protein | X-ray | 2010-09-01 |         |

|      |   |     |           |          |        |                                              |            |                          |     |         |       |            |      |
|------|---|-----|-----------|----------|--------|----------------------------------------------|------------|--------------------------|-----|---------|-------|------------|------|
| 3MCD | A | 80  | 18431.50  | 9215.75  |        | Cell division topological specificity factor | Cell cycle |                          |     | Protein | X-ray | 2010-05-05 |      |
|      | B | 80  | 18431.50  | 9215.75  |        | Cell division topological specificity factor | Cell cycle |                          |     | Protein | X-ray | 2010-05-05 |      |
| 3MLE | A | 242 | 167606.38 | 27148.30 | 159.23 | Dethiobiotin synthetase                      | Ligase     | 8-aminooctanoic acid     | 8AC | Protein | X-ray | 2010-05-19 | MCSG |
|      | A | 242 | 167606.38 | 27148.30 | 427.20 | Dethiobiotin synthetase                      | Ligase     | Adenosine-5'-diphosphate | ADP | Protein | X-ray | 2010-05-19 | MCSG |
|      | A | 242 | 167606.38 | 27148.30 | 35.45  | Dethiobiotin synthetase                      | Ligase     | Chloride ion             | CL  | Protein | X-ray | 2010-05-19 | MCSG |
|      | A | 242 | 167606.38 | 27148.30 | 24.31  | Dethiobiotin synthetase                      | Ligase     | Magnesium ion            | MG  | Protein | X-ray | 2010-05-19 | MCSG |
|      | A | 242 | 167606.38 | 27148.30 | 62.01  | Dethiobiotin synthetase                      | Ligase     | Nitrate ion              | NO3 | Protein | X-ray | 2010-05-19 | MCSG |
|      | A | 242 | 167606.38 | 27148.30 | 94.97  | Dethiobiotin synthetase                      | Ligase     | Phosphate ion            | PO4 | Protein | X-ray | 2010-05-19 | MCSG |
|      | B | 242 | 167606.38 | 27148.30 | 159.23 | Dethiobiotin synthetase                      | Ligase     | 8-aminooctanoic acid     | 8AC | Protein | X-ray | 2010-05-19 | MCSG |
|      | B | 242 | 167606.38 | 27148.30 | 427.20 | Dethiobiotin synthetase                      | Ligase     | Adenosine-5'-diphosphate | ADP | Protein | X-ray | 2010-05-19 | MCSG |
|      | B | 242 | 167606.38 | 27148.30 | 24.31  | Dethiobiotin synthetase                      | Ligase     | Magnesium ion            | MG  | Protein | X-ray | 2010-05-19 | MCSG |
|      | B | 242 | 167606.38 | 27148.30 | 62.01  | Dethiobiotin synthetase                      | Ligase     | Nitrate ion              | NO3 | Protein | X-ray | 2010-05-19 | MCSG |
|      | B | 242 | 167606.38 | 27148.30 | 94.97  | Dethiobiotin synthetase                      | Ligase     | Phosphate ion            | PO4 | Protein | X-ray | 2010-05-19 | MCSG |
|      | C | 242 | 167606.38 | 27148.30 | 159.23 | Dethiobiotin synthetase                      | Ligase     | 8-aminooctanoic acid     | 8AC | Protein | X-ray | 2010-05-19 | MCSG |
|      | C | 242 | 167606.38 | 27148.30 | 427.20 | Dethiobiotin synthetase                      | Ligase     | Adenosine-5'-diphosphate | ADP | Protein | X-ray | 2010-05-19 | MCSG |
|      | C | 242 | 167606.38 | 27148.30 | 35.45  | Dethiobiotin synthetase                      | Ligase     | Chloride ion             | CL  | Protein | X-ray | 2010-05-19 | MCSG |
|      | C | 242 | 167606.38 | 27148.30 | 24.31  | Dethiobiotin synthetase                      | Ligase     | Magnesium ion            | MG  | Protein | X-ray | 2010-05-19 | MCSG |
|      | C | 242 | 167606.38 | 27148.30 | 94.97  | Dethiobiotin synthetase                      | Ligase     | Phosphate ion            | PO4 | Protein | X-ray | 2010-05-19 | MCSG |
|      | D | 242 | 167606.38 | 27148.30 | 159.23 | Dethiobiotin synthetase                      | Ligase     | 8-aminooctanoic acid     | 8AC | Protein | X-ray | 2010-05-19 | MCSG |
|      | D | 242 | 167606.38 | 27148.30 | 427.20 | Dethiobiotin synthetase                      | Ligase     | Adenosine-5'-diphosphate | ADP | Protein | X-ray | 2010-05-19 | MCSG |
|      | D | 242 | 167606.38 | 27148.30 | 24.31  | Dethiobiotin synthetase                      | Ligase     | Magnesium ion            | MG  | Protein | X-ray | 2010-05-19 | MCSG |
|      | D | 242 | 167606.38 | 27148.30 | 94.97  | Dethiobiotin synthetase                      | Ligase     | Phosphate ion            | PO4 | Protein | X-ray | 2010-05-19 | MCSG |
|      | E | 242 | 167606.38 | 27148.30 | 159.23 | Dethiobiotin synthetase                      | Ligase     | 8-aminooctanoic acid     | 8AC | Protein | X-ray | 2010-05-19 | MCSG |
|      | E | 242 | 167606.38 | 27148.30 | 427.20 | Dethiobiotin synthetase                      | Ligase     | Adenosine-5'-diphosphate | ADP | Protein | X-ray | 2010-05-19 | MCSG |
|      | E | 242 | 167606.38 | 27148.30 | 24.31  | Dethiobiotin synthetase                      | Ligase     | Magnesium ion            | MG  | Protein | X-ray | 2010-05-19 | MCSG |
|      | E | 242 | 167606.38 | 27148.30 | 94.97  | Dethiobiotin synthetase                      | Ligase     | Phosphate ion            | PO4 | Protein | X-ray | 2010-05-19 | MCSG |
|      | F | 242 | 167606.38 | 27148.30 | 159.23 | Dethiobiotin synthetase                      | Ligase     | 8-aminooctanoic acid     | 8AC | Protein | X-ray | 2010-05-19 | MCSG |
|      | F | 242 | 167606.38 | 27148.30 | 427.20 | Dethiobiotin synthetase                      | Ligase     | Adenosine-5'-diphosphate | ADP | Protein | X-ray | 2010-05-19 | MCSG |
|      | F | 242 | 167606.38 | 27148.30 | 35.45  | Dethiobiotin synthetase                      | Ligase     | Chloride ion             | CL  | Protein | X-ray | 2010-05-19 | MCSG |

|             |   |     |           |          |        |                           |                   |                                                                                                 |     |         |       |            |      |
|-------------|---|-----|-----------|----------|--------|---------------------------|-------------------|-------------------------------------------------------------------------------------------------|-----|---------|-------|------------|------|
|             | F | 242 | 167606.38 | 27148.30 | 24.31  | Dethiobiotin synthetase   | Ligase            | Magnesium ion                                                                                   | MG  | Protein | X-ray | 2010-05-19 | MCSG |
|             | F | 242 | 167606.38 | 27148.30 | 62.01  | Dethiobiotin synthetase   | Ligase            | Nitrate ion                                                                                     | NO3 | Protein | X-ray | 2010-05-19 | MCSG |
|             | F | 242 | 167606.38 | 27148.30 | 94.97  | Dethiobiotin synthetase   | Ligase            | Phosphate ion                                                                                   | PO4 | Protein | X-ray | 2010-05-19 | MCSG |
| <b>3MLG</b> | A | 189 | 43924.40  | 21962.20 |        | Putativeprotein,Protein   | Unknown function  |                                                                                                 |     | Protein | X-ray | 2010-05-12 |      |
|             | B | 189 | 43924.40  | 21962.20 |        | Putativeprotein,Protein   | Unknown function  |                                                                                                 |     | Protein | X-ray | 2010-05-12 |      |
| <b>3MLI</b> | A | 100 | 47758.96  | 11919.70 |        | Putativeprotein           | Unknown function  |                                                                                                 |     | Protein | X-ray | 2010-05-12 |      |
|             | B | 100 | 47758.96  | 11919.70 |        | Putativeprotein           | Unknown function  |                                                                                                 |     | Protein | X-ray | 2010-05-12 |      |
|             | C | 100 | 47758.96  | 11919.70 |        | Putativeprotein           | Unknown function  |                                                                                                 |     | Protein | X-ray | 2010-05-12 |      |
|             | D | 100 | 47758.96  | 11919.70 | 40.08  | Putativeprotein           | Unknown function  | Calcium ion                                                                                     | CA  | Protein | X-ray | 2010-05-12 |      |
| <b>3MRS</b> | A | 168 | 19179.40  | 19179.40 |        | Shikimate kinase          | Transferase       |                                                                                                 |     | Protein | X-ray | 2011-05-04 |      |
| <b>3MUF</b> | A | 168 | 19946.84  | 19265.50 | 427.20 | Shikimate kinase          | Transferase       | Adenosine-5'-diphosphate                                                                        | ADP | Protein | X-ray | 2011-05-04 |      |
|             | A | 168 | 19946.84  | 19265.50 | 254.13 | Shikimate kinase          | Transferase       | Shikimate-3-phosphate                                                                           | S3P | Protein | X-ray | 2011-05-04 |      |
| <b>3MYD</b> | A | 365 | 40972.80  | 40972.80 |        | Flagellarprotein flha     | Protein transport |                                                                                                 |     | Protein | X-ray | 2010-05-26 |      |
| <b>3N2E</b> | A | 168 | 58742.29  | 19004.30 | 489.47 | Shikimate kinase          | Transferase       | 7-amino-4-hydroxy-3-[(e)-(5-hydroxy-7-sulfonaphthalen-2-yl)diazenyl]naphthalene-2-sulfonic acid | OSA | Protein | X-ray | 2011-05-18 |      |
| <b>3N2E</b> | A | 168 | 58742.29  | 19004.30 | 150.09 | Shikimate kinase          | Transferase       | L(+)-tartaric acid                                                                              | TLA | Protein | X-ray | 2011-05-18 |      |
|             | B | 168 | 58742.29  | 19004.30 | 489.47 | Shikimate kinase          | Transferase       | 7-amino-4-hydroxy-3-[(e)-(5-hydroxy-7-sulfonaphthalen-2-yl)diazenyl]naphthalene-2-sulfonic acid | OSA | Protein | X-ray | 2011-05-18 |      |
|             | B | 168 | 58742.29  | 19004.30 | 150.09 | Shikimate kinase          | Transferase       | L(+)-tartaric acid                                                                              | TLA | Protein | X-ray | 2011-05-18 |      |
|             | C | 168 | 58742.29  | 19004.30 |        | Shikimate kinase          | Transferase       |                                                                                                 |     | Protein | X-ray | 2011-05-18 |      |
| <b>3N3Y</b> | A | 216 | 104173.55 | 24872.60 | 785.56 | Thymidylate synthase thyx | Transferase       | Flavin-adenine dinucleotide                                                                     | FAD | Protein | X-ray | 2011-05-25 |      |
|             | A | 216 | 104173.55 | 24872.60 | 308.18 | Thymidylate synthase thyx | Transferase       | 2'-deoxyuridine 5'-monophosphate                                                                | UMP | Protein | X-ray | 2011-05-25 |      |
|             | B | 216 | 104173.55 | 24872.60 | 785.56 | Thymidylate synthase thyx | Transferase       | Flavin-adenine dinucleotide                                                                     | FAD | Protein | X-ray | 2011-05-25 |      |
|             | B | 216 | 104173.55 | 24872.60 | 308.18 | Thymidylate synthase thyx | Transferase       | 2'-deoxyuridine 5'-monophosphate                                                                | UMP | Protein | X-ray | 2011-05-25 |      |
|             | C | 216 | 104173.55 | 24872.60 | 785.56 | Thymidylate synthase thyx | Transferase       | Flavin-adenine dinucleotide                                                                     | FAD | Protein | X-ray | 2011-05-25 |      |
|             | C | 216 | 104173.55 | 24872.60 | 308.18 | Thymidylate synthase thyx | Transferase       | 2'-deoxyuridine 5'-monophosphate                                                                | UMP | Protein | X-ray | 2011-05-25 |      |
|             | D | 216 | 104173.55 | 24872.60 | 785.56 | Thymidylate synthase thyx | Transferase       | Flavin-adenine dinucleotide                                                                     | FAD | Protein | X-ray | 2011-05-25 |      |

|             |   |     |           |          |        |                                |             |                                                                  |     |         |       |            |
|-------------|---|-----|-----------|----------|--------|--------------------------------|-------------|------------------------------------------------------------------|-----|---------|-------|------------|
|             | D | 216 | 104173.55 | 24872.60 | 308.18 | Thymidylate synthase thyx      | Transferase | 2'-deoxyuridine 5'-monophosphate                                 | UMP | Protein | X-ray | 2011-05-25 |
| <b>3N9R</b> | A | 307 | 273344.62 | 33801.10 | 35.45  | Fructose-bisphosphate aldolase | Lyase       | Chloride ion                                                     | CL  | Protein | X-ray | 2010-11-17 |
|             | A | 307 | 273344.62 | 33801.10 | 22.99  | Fructose-bisphosphate aldolase | Lyase       | Sodium ion                                                       | NA  | Protein | X-ray | 2010-11-17 |
|             | A | 307 | 273344.62 | 33801.10 | 243.15 | Fructose-bisphosphate aldolase | Lyase       | 2-[hydroxy(4-hydroxybutyl)amino]-2-oxoethyl dihydrogen phosphate | TD3 | Protein | X-ray | 2010-11-17 |
|             | A | 307 | 273344.62 | 33801.10 | 65.38  | Fructose-bisphosphate aldolase | Lyase       | Zinc ion                                                         | ZN  | Protein | X-ray | 2010-11-17 |
|             | B | 307 | 273344.62 | 33801.10 | 35.45  | Fructose-bisphosphate aldolase | Lyase       | Chloride ion                                                     | CL  | Protein | X-ray | 2010-11-17 |
|             | B | 307 | 273344.62 | 33801.10 | 22.99  | Fructose-bisphosphate aldolase | Lyase       | Sodium ion                                                       | NA  | Protein | X-ray | 2010-11-17 |
|             | B | 307 | 273344.62 | 33801.10 | 243.15 | Fructose-bisphosphate aldolase | Lyase       | 2-[hydroxy(4-hydroxybutyl)amino]-2-oxoethyl dihydrogen phosphate | TD3 | Protein | X-ray | 2010-11-17 |
|             | B | 307 | 273344.62 | 33801.10 | 65.38  | Fructose-bisphosphate aldolase | Lyase       | Zinc ion                                                         | ZN  | Protein | X-ray | 2010-11-17 |
|             | e | 307 | 273344.62 | 33801.10 | 35.45  | Fructose-bisphosphate aldolase | Lyase       | Chloride ion                                                     | CL  | Protein | X-ray | 2010-11-17 |
|             | e | 307 | 273344.62 | 33801.10 | 22.99  | Fructose-bisphosphate aldolase | Lyase       | Sodium ion                                                       | NA  | Protein | X-ray | 2010-11-17 |
|             | e | 307 | 273344.62 | 33801.10 | 243.15 | Fructose-bisphosphate aldolase | Lyase       | 2-[hydroxy(4-hydroxybutyl)amino]-2-oxoethyl dihydrogen phosphate | TD3 | Protein | X-ray | 2010-11-17 |
|             | e | 307 | 273344.62 | 33801.10 | 65.38  | Fructose-bisphosphate aldolase | Lyase       | Zinc ion                                                         | ZN  | Protein | X-ray | 2010-11-17 |
|             | j | 307 | 273344.62 | 33801.10 | 35.45  | Fructose-bisphosphate aldolase | Lyase       | Chloride ion                                                     | CL  | Protein | X-ray | 2010-11-17 |
|             | j | 307 | 273344.62 | 33801.10 | 22.99  | Fructose-bisphosphate aldolase | Lyase       | Sodium ion                                                       | NA  | Protein | X-ray | 2010-11-17 |
|             | j | 307 | 273344.62 | 33801.10 | 243.15 | Fructose-bisphosphate aldolase | Lyase       | 2-[hydroxy(4-hydroxybutyl)amino]-2-oxoethyl dihydrogen phosphate | TD3 | Protein | X-ray | 2010-11-17 |
|             | j | 307 | 273344.62 | 33801.10 | 65.38  | Fructose-bisphosphate aldolase | Lyase       | Zinc ion                                                         | ZN  | Protein | X-ray | 2010-11-17 |
|             | K | 307 | 273344.62 | 33801.10 | 35.45  | Fructose-bisphosphate aldolase | Lyase       | Chloride ion                                                     | CL  | Protein | X-ray | 2010-11-17 |
|             | K | 307 | 273344.62 | 33801.10 | 22.99  | Fructose-bisphosphate aldolase | Lyase       | Sodium ion                                                       | NA  | Protein | X-ray | 2010-11-17 |
|             | K | 307 | 273344.62 | 33801.10 | 243.15 | Fructose-bisphosphate aldolase | Lyase       | 2-[hydroxy(4-hydroxybutyl)amino]-2-oxoethyl dihydrogen phosphate | TD3 | Protein | X-ray | 2010-11-17 |
|             | K | 307 | 273344.62 | 33801.10 | 65.38  | Fructose-bisphosphate aldolase | Lyase       | Zinc ion                                                         | ZN  | Protein | X-ray | 2010-11-17 |
|             | P | 307 | 273344.62 | 33801.10 | 35.45  | Fructose-bisphosphate aldolase | Lyase       | Chloride ion                                                     | CL  | Protein | X-ray | 2010-11-17 |
|             | P | 307 | 273344.62 | 33801.10 | 22.99  | Fructose-bisphosphate aldolase | Lyase       | Sodium ion                                                       | NA  | Protein | X-ray | 2010-11-17 |
|             | P | 307 | 273344.62 | 33801.10 | 243.15 | Fructose-bisphosphate aldolase | Lyase       | 2-[hydroxy(4-hydroxybutyl)amino]-2-oxoethyl dihydrogen phosphate | TD3 | Protein | X-ray | 2010-11-17 |
|             | P | 307 | 273344.62 | 33801.10 | 65.38  | Fructose-bisphosphate aldolase | Lyase       | Zinc ion                                                         | ZN  | Protein | X-ray | 2010-11-17 |

|             |   |     |           |          |        |                                |                            |                                                                  |     |         |       |            |
|-------------|---|-----|-----------|----------|--------|--------------------------------|----------------------------|------------------------------------------------------------------|-----|---------|-------|------------|
|             | U | 307 | 273344.62 | 33801.10 | 35.45  | Fructose-bisphosphate aldolase | Lyase                      | Chloride ion                                                     | CL  | Protein | X-ray | 2010-11-17 |
|             | U | 307 | 273344.62 | 33801.10 | 22.99  | Fructose-bisphosphate aldolase | Lyase                      | Sodium ion                                                       | NA  | Protein | X-ray | 2010-11-17 |
|             | U | 307 | 273344.62 | 33801.10 | 243.15 | Fructose-bisphosphate aldolase | Lyase                      | 2-[hydroxy(4-hydroxybutyl)amino]-2-oxoethyl dihydrogen phosphate | TD3 | Protein | X-ray | 2010-11-17 |
|             | U | 307 | 273344.62 | 33801.10 | 65.38  | Fructose-bisphosphate aldolase | Lyase                      | Zinc ion                                                         | ZN  | Protein | X-ray | 2010-11-17 |
|             | Z | 307 | 273344.62 | 33801.10 | 35.45  | Fructose-bisphosphate aldolase | Lyase                      | Chloride ion                                                     | CL  | Protein | X-ray | 2010-11-17 |
|             | Z | 307 | 273344.62 | 33801.10 | 22.99  | Fructose-bisphosphate aldolase | Lyase                      | Sodium ion                                                       | NA  | Protein | X-ray | 2010-11-17 |
|             | Z | 307 | 273344.62 | 33801.10 | 243.15 | Fructose-bisphosphate aldolase | Lyase                      | 2-[hydroxy(4-hydroxybutyl)amino]-2-oxoethyl dihydrogen phosphate | TD3 | Protein | X-ray | 2010-11-17 |
|             | Z | 307 | 273344.62 | 33801.10 | 65.38  | Fructose-bisphosphate aldolase | Lyase                      | Zinc ion                                                         | ZN  | Protein | X-ray | 2010-11-17 |
| <b>3N9S</b> | A | 307 | 68505.37  | 33801.10 | 40.08  | Fructose-bisphosphate aldolase | Lyase/lyase inhibitor      | Calcium ion                                                      | CA  | Protein | X-ray | 2010-11-17 |
|             | A | 307 | 68505.37  | 33801.10 | 22.99  | Fructose-bisphosphate aldolase | Lyase/lyase inhibitor      | Sodium ion                                                       | NA  | Protein | X-ray | 2010-11-17 |
|             | A | 307 | 68505.37  | 33801.10 | 323.13 | Fructose-bisphosphate aldolase | Lyase/lyase inhibitor      | 4-(hydroxy[(phosphonoxy)acetyl]amino)butyl dihydrogen phosphate  | TD4 | Protein | X-ray | 2010-11-17 |
|             | A | 307 | 68505.37  | 33801.10 | 65.38  | Fructose-bisphosphate aldolase | Lyase/lyase inhibitor      | Zinc ion                                                         | ZN  | Protein | X-ray | 2010-11-17 |
|             | B | 307 | 68505.37  | 33801.10 | 40.08  | Fructose-bisphosphate aldolase | Lyase/lyase inhibitor      | Calcium ion                                                      | CA  | Protein | X-ray | 2010-11-17 |
|             | B | 307 | 68505.37  | 33801.10 | 22.99  | Fructose-bisphosphate aldolase | Lyase/lyase inhibitor      | Sodium ion                                                       | NA  | Protein | X-ray | 2010-11-17 |
|             | B | 307 | 68505.37  | 33801.10 | 323.13 | Fructose-bisphosphate aldolase | Lyase/lyase inhibitor      | 4-(hydroxy[(phosphonoxy)acetyl]amino)butyl dihydrogen phosphate  | TD4 | Protein | X-ray | 2010-11-17 |
|             | B | 307 | 68505.37  | 33801.10 | 65.38  | Fructose-bisphosphate aldolase | Lyase/lyase inhibitor      | Zinc ion                                                         | ZN  | Protein | X-ray | 2010-11-17 |
| <b>3NA7</b> | A | 256 | 30127.29  | 29799.30 | 238.30 | HP0958                         | Gene regulation, chaperone | 4-(2-hydroxyethyl)-1-piperazine ethanesulfonic acid              | EPE | Protein | X-ray | 2010-09-22 |
|             | A | 256 | 30127.29  | 29799.30 | 24.31  | HP0958                         | Gene regulation, chaperone | Magnesium ion                                                    | MG  | Protein | X-ray | 2010-09-22 |
|             | A | 256 | 30127.29  | 29799.30 | 65.38  | HP0958                         | Gene regulation, chaperone | Zinc ion                                                         | ZN  | Protein | X-ray | 2010-09-22 |
| <b>3NM4</b> | A | 230 | 50594.75  | 25050.10 | 62.07  | MTA/SAH nucleosidase           | Hydrolase                  | 1,2-ethanediol                                                   | EDO | Protein | X-ray | 2010-11-24 |
|             | A | 230 | 50594.75  | 25050.10 | 122.14 | MTA/SAH nucleosidase           | Hydrolase                  | 2-amino-2-hydroxymethyl-propane-1,3-diol                         | TRS | Protein | X-ray | 2010-11-24 |

|             |   |     |          |          |        |                                        |               |                                                                         |     |         |       |            |        |
|-------------|---|-----|----------|----------|--------|----------------------------------------|---------------|-------------------------------------------------------------------------|-----|---------|-------|------------|--------|
| <b>3NM5</b> | B | 230 | 50594.75 | 25050.10 | 62.07  | MTA/SAH nucleosidase                   | Hydrolase     | 1,2-ethanediol                                                          | EDO | Protein | X-ray | 2010-11-24 |        |
|             | A | 230 | 50634.69 | 25050.10 | 267.24 | MTA/SAH nucleosidase                   | Hydrolase     | (1s)-1-(7-amino-1h-pyrazolo[4,3-d]pyrimidin-3-yl)-1,4-anhydro-d-ribitol | FMC | Protein | X-ray | 2010-11-24 |        |
|             | B | 230 | 50634.69 | 25050.10 | 267.24 | MTA/SAH nucleosidase                   | Hydrolase     | (1s)-1-(7-amino-1h-pyrazolo[4,3-d]pyrimidin-3-yl)-1,4-anhydro-d-ribitol | FMC | Protein | X-ray | 2010-11-24 |        |
|             | B | 230 | 25555.64 | 25050.10 | 135.13 | MTA/SAH nucleosidase                   | Hydrolase     | Adenine                                                                 | ADE | Protein | X-ray | 2010-11-24 |        |
|             | B | 230 | 25555.64 | 25050.10 | 62.07  | MTA/SAH nucleosidase                   | Hydrolase     | 1,2-ethanediol                                                          | EDO | Protein | X-ray | 2010-11-24 |        |
|             | B | 230 | 25555.64 | 25050.10 | 122.14 | MTA/SAH nucleosidase                   | Hydrolase     | 2-amino-2-hydroxymethyl-propane-1,3-diol                                | TRS | Protein | X-ray | 2010-11-24 |        |
| <b>3NV7</b> | A | 157 | 18171.08 | 17726.80 | 60.05  | Phosphopantetheine adenylyltransferase | Transferase   | Acetic acid                                                             | ACY | Protein | X-ray | 2011-07-13 |        |
|             | A | 157 | 18171.08 | 17726.80 | 96.06  | Phosphopantetheine adenylyltransferase | Transferase   | Sulfate ion                                                             | SO4 | Protein | X-ray | 2011-07-13 |        |
| <b>3NXZ</b> | A | 170 | 77714.34 | 19412.70 | 63.55  | UreaseProtein ureE                     | Metalprotein  | Copper (ii) ion                                                         | CU  | Protein | X-ray | 2010-08-25 | MKBSGI |
|             | B | 170 | 77714.34 | 19412.70 |        | UreaseProtein ureE                     | Metalprotein  |                                                                         |     | Protein | X-ray | 2010-08-25 | MKBSGI |
|             | C | 170 | 77714.34 | 19412.70 |        | UreaseProtein ureE                     | Metalprotein  |                                                                         |     | Protein | X-ray | 2010-08-25 | MKBSGI |
|             | D | 170 | 77714.34 | 19412.70 |        | UreaseProtein ureE                     | Metalprotein  |                                                                         |     | Protein | X-ray | 2010-08-25 | MKBSGI |
| <b>3NY0</b> | A | 170 | 77709.50 | 19412.70 |        | UreaseProtein ureE                     | Metalprotein  |                                                                         |     | Protein | X-ray | 2010-08-25 | MKBSGI |
|             | B | 170 | 77709.50 | 19412.70 | 58.70  | UreaseProtein ureE                     | Metalprotein  | Nickel (ii) ion                                                         | NI  | Protein | X-ray | 2010-08-25 | MKBSGI |
|             | C | 170 | 77709.50 | 19412.70 |        | UreaseProtein ureE                     | Metalprotein  |                                                                         |     | Protein | X-ray | 2010-08-25 | MKBSGI |
|             | D | 170 | 77709.50 | 19412.70 |        | UreaseProtein ureE                     | Metalprotein  |                                                                         |     | Protein | X-ray | 2010-08-25 | MKBSGI |
| <b>3OIQ</b> | A | 254 | 85956.00 | 28652.00 |        | UreaseProtein ureF                     | Metalprotein  |                                                                         |     | Protein | X-ray | 2010-08-18 |        |
|             | B | 254 | 85956.00 | 28652.00 |        | UreaseProtein ureF                     | Metalprotein  |                                                                         |     | Protein | X-ray | 2010-08-18 |        |
|             | C | 254 | 85956.00 | 28652.00 |        | UreaseProtein ureF                     | Metalprotein  |                                                                         |     | Protein | X-ray | 2010-08-18 |        |
| <b>3OQG</b> | A | 180 | 47812.51 | 21130.20 | 35.45  | Hpy188I                                | Hydrolase/dna | Chloride ion                                                            | CL  | Protein | X-ray | 2010-10-20 |        |
|             |   |     |          |          |        |                                        |               |                                                                         |     | DNA     |       |            |        |
|             | A | 180 | 47812.51 | 21130.20 | 196.11 | Hpy188I                                | Hydrolase/dna | Selenomethionine                                                        | MSE | Protein | X-ray | 2010-10-20 |        |
|             |   |     |          |          |        |                                        |               |                                                                         |     | DNA     |       |            |        |
|             | A | 180 | 47812.51 | 21130.20 | 22.99  | Hpy188I                                | Hydrolase/dna | Sodium ion                                                              | NA  | Protein | X-ray | 2010-10-20 |        |
|             |   |     |          |          |        |                                        |               |                                                                         |     | DNA     |       |            |        |
|             | B | 180 | 47812.51 | 21130.20 | 196.11 | Hpy188I                                | Hydrolase/dna | Selenomethionine                                                        | MSE | Protein | X-ray | 2010-10-20 |        |

|             |   |     |           |          |        |                                                 |               |                  |     |                |       |            |
|-------------|---|-----|-----------|----------|--------|-------------------------------------------------|---------------|------------------|-----|----------------|-------|------------|
|             | B | 180 | 47812.51  | 21130.20 | 22.99  | Hpy188I                                         | Hydrolase/dna | Sodium ion       | NA  | DNA<br>Protein | X-ray | 2010-10-20 |
|             | C | 9   | 47812.51  | 2739.85  |        | DNA 5'-<br>D(*GP*AP*TP*CP*TP*GP*AP*AP*<br>C)-3' | Hydrolase/dna |                  |     | DNA<br>Protein | X-ray | 2010-10-20 |
|             | D | 9   | 47812.51  | 2730.83  |        | DNA 5'-<br>D(*GP*TP*TP*CP*AP*GP*AP*TP*<br>C)-3' | Hydrolase/dna |                  |     | DNA<br>Protein | X-ray | 2010-10-20 |
| <b>3OR3</b> | A | 180 | 47903.22  | 21130.20 | 40.08  | Restriction endonuclease hpy188i                | Hydrolase/dna | Calcium ion      | CA  | DNA<br>Protein | X-ray | 2010-10-20 |
|             | A | 180 | 47903.22  | 21130.20 | 35.45  | Restriction endonuclease hpy188i                | Hydrolase/dna | Chloride ion     | CL  | DNA<br>Protein | X-ray | 2010-10-20 |
|             | A | 180 | 47903.22  | 21130.20 | 196.11 | Restriction endonuclease hpy188i                | Hydrolase/dna | Selenomethionine | MSE | DNA<br>Protein | X-ray | 2010-10-20 |
|             | B | 180 | 47903.22  | 21130.20 | 35.45  | Restriction endonuclease hpy188i                | Hydrolase/dna | Chloride ion     | CL  | DNA<br>Protein | X-ray | 2010-10-20 |
|             | B | 180 | 47903.22  | 21130.20 | 196.11 | Restriction endonuclease hpy188i                | Hydrolase/dna | Selenomethionine | MSE | DNA<br>Protein | X-ray | 2010-10-20 |
|             | C | 5   | 47903.22  | 1495.04  |        | 5'-D(*GP*AP*TP*CP*T)-3'                         | Hydrolase/dna |                  |     | DNA<br>Protein | X-ray | 2010-10-20 |
|             | D | 5   | 47903.22  | 1495.04  |        | 5'-D(*GP*TP*TP*CP*A)-3'                         | Hydrolase/dna |                  |     | DNA<br>Protein | X-ray | 2010-10-20 |
|             | E | 4   | 47903.22  | 1199.85  |        | 5'-D(P*GP*AP*AP*C)-3'                           | Hydrolase/dna |                  |     | DNA<br>Protein | X-ray | 2010-10-20 |
|             | F | 4   | 47903.22  | 1190.84  |        | 5'-D(P*GP*AP*TP*C)-3'                           | Hydrolase/dna |                  |     | DNA<br>Protein | X-ray | 2010-10-20 |
| <b>3OTW</b> | A | 163 | 116401.20 | 18520.60 | 767.53 | Phosphopantetheine<br>adenylyltransferase       | Transferase   | Coenzyme a       | COA | DNA<br>Protein | X-ray | 2011-09-14 |
|             | A | 163 | 116401.20 | 18520.60 | 96.06  | Phosphopantetheine<br>adenylyltransferase       | Transferase   | Sulfate ion      | SO4 | DNA<br>Protein | X-ray | 2011-09-14 |

|             |   |     |           |          |        |                                           |                |                                                                 |     |         |       |            |      |
|-------------|---|-----|-----------|----------|--------|-------------------------------------------|----------------|-----------------------------------------------------------------|-----|---------|-------|------------|------|
|             | B | 163 | 116401.20 | 18520.60 | 767.53 | Phosphopantetheine<br>adenylyltransferase | Transferase    | Coenzyme a                                                      | COA | Protein | X-ray | 2011-09-14 |      |
|             | B | 163 | 116401.20 | 18520.60 | 96.06  | Phosphopantetheine<br>adenylyltransferase | Transferase    | Sulfate ion                                                     | SO4 | Protein | X-ray | 2011-09-14 |      |
|             | C | 163 | 116401.20 | 18520.60 | 767.53 | Phosphopantetheine<br>adenylyltransferase | Transferase    | Coenzyme a                                                      | COA | Protein | X-ray | 2011-09-14 |      |
|             | C | 163 | 116401.20 | 18520.60 | 96.06  | Phosphopantetheine<br>adenylyltransferase | Transferase    | Sulfate ion                                                     | SO4 | Protein | X-ray | 2011-09-14 |      |
|             | D | 163 | 116401.20 | 18520.60 | 767.53 | Phosphopantetheine<br>adenylyltransferase | Transferase    | Coenzyme a                                                      | COA | Protein | X-ray | 2011-09-14 |      |
|             | D | 163 | 116401.20 | 18520.60 | 96.06  | Phosphopantetheine<br>adenylyltransferase | Transferase    | Sulfate ion                                                     | SO4 | Protein | X-ray | 2011-09-14 |      |
|             | E | 163 | 116401.20 | 18520.60 | 767.53 | Phosphopantetheine<br>adenylyltransferase | Transferase    | Coenzyme a                                                      | COA | Protein | X-ray | 2011-09-14 |      |
|             | E | 163 | 116401.20 | 18520.60 | 96.06  | Phosphopantetheine<br>adenylyltransferase | Transferase    | Sulfate ion                                                     | SO4 | Protein | X-ray | 2011-09-14 |      |
|             | F | 163 | 116401.20 | 18520.60 | 767.53 | Phosphopantetheine<br>adenylyltransferase | Transferase    | Coenzyme a                                                      | COA | Protein | X-ray | 2011-09-14 |      |
| <b>3P9Z</b> | A | 229 | 26411.45  | 26309.40 | 102.05 | Uroporphyrinogen III cosynthase<br>(HemD) | Ligase         | Malonate ion                                                    | MLI | Protein | X-ray | 2010-11-03 | MCSG |
|             | A | 229 | 26411.45  | 26309.40 | 196.11 | Uroporphyrinogen III cosynthase<br>(HemD) | Ligase         | Selenomethionine                                                | MSE | Protein | X-ray | 2010-11-03 | MCSG |
| <b>3PHG</b> | A | 269 | 60278.40  | 30139.20 |        | Shikimate dehydrogenase                   | Oxidoreductase |                                                                 |     | Protein | X-ray | 2011-11-09 |      |
|             | B | 269 | 60278.40  | 30139.20 |        | Shikimate dehydrogenase                   | Oxidoreductase |                                                                 |     | Protein | X-ray | 2011-11-09 |      |
| <b>3PHH</b> | A | 269 | 30313.35  | 30139.20 | 174.15 | Shikimate dehydrogenase                   | Oxidoreductase | (3r,4s,5r)-3,4,5-trihydroxycyclohex-1-<br>ene-1-carboxylic acid | SKM | Protein | X-ray | 2011-11-09 |      |
| <b>3PHI</b> | A | 269 | 62117.56  | 30139.20 | 745.43 | Shikimate dehydrogenase                   | Oxidoreductase | Nadph dihydro-nicotinamide-adenine-<br>dinucleotide phosphate   | NDP | Protein | X-ray | 2011-11-09 |      |
|             | A | 269 | 62117.56  | 30139.20 | 174.15 | Shikimate dehydrogenase                   | Oxidoreductase | (3r,4s,5r)-3,4,5-trihydroxycyclohex-1-<br>ene-1-carboxylic acid | SKM | Protein | X-ray | 2011-11-09 |      |
|             | B | 269 | 62117.56  | 30139.20 | 745.43 | Shikimate dehydrogenase                   | Oxidoreductase | Nadph dihydro-nicotinamide-adenine-                             | NDP | Protein | X-ray | 2011-11-09 |      |

|             |   |     |           |          |        |                                         |                        |                                                             |     |         |       |                    |
|-------------|---|-----|-----------|----------|--------|-----------------------------------------|------------------------|-------------------------------------------------------------|-----|---------|-------|--------------------|
|             |   |     |           |          |        |                                         | dinucleotide phosphate |                                                             |     |         |       |                    |
|             | B | 269 | 62117.56  | 30139.20 | 174.15 | Shikimate dehydrogenase                 | Oxidoreductase         | (3r,4s,5r)-3,4,5-trihydroxycyclohex-1-ene-1-carboxylic acid | SKM | Protein | X-ray | 2011-11-09         |
| <b>3PHJ</b> | A | 269 | 60626.70  | 30139.20 | 174.15 | Shikimate dehydrogenase                 | Oxidoreductase         | 3-dehydroshikimate                                          | DHK | Protein | X-ray | 2011-11-09         |
|             | B | 269 | 60626.70  | 30139.20 | 174.15 | Shikimate dehydrogenase                 | Oxidoreductase         | 3-dehydroshikimate                                          | DHK | Protein | X-ray | 2011-11-09         |
| <b>3PHT</b> | A | 148 | 34324.00  | 17103.30 | 58.70  | Putative nickel-responsive regulator    | Transcription          | Nickel (ii) ion                                             | NI  | Protein | X-ray | 2011-11-23         |
|             | B | 148 | 34324.00  | 17103.30 | 58.70  | Putative nickel-responsive regulator    | Transcription          | Nickel (ii) ion                                             | NI  | Protein | X-ray | 2011-11-23         |
| <b>3QIO</b> | A | 310 | 143464.69 | 35175.50 | 246.09 | Geranyltranstransferase (IspA)          | Transferase            | 3-methylbut-3-enyl trihydrogen diphosphate                  | IPE | Protein | X-ray | 2011-01-12 NYSRCSG |
|             | A | 310 | 143464.69 | 35175.50 | 24.31  | Geranyltranstransferase (IspA)          | Transferase            | Magnesium ion                                               | MG  | Protein | X-ray | 2011-01-12 NYSRCSG |
|             | A | 310 | 143464.69 | 35175.50 | 96.06  | Geranyltranstransferase (IspA)          | Transferase            | Sulfate ion                                                 | SO4 | Protein | X-ray | 2011-01-12 NYSRCSG |
|             | B | 310 | 143464.69 | 35175.50 | 246.09 | Geranyltranstransferase (IspA)          | Transferase            | 3-methylbut-3-enyl trihydrogen diphosphate                  | IPE | Protein | X-ray | 2011-01-12 NYSRCSG |
|             | B | 310 | 143464.69 | 35175.50 | 24.31  | Geranyltranstransferase (IspA)          | Transferase            | Magnesium ion                                               | MG  | Protein | X-ray | 2011-01-12 NYSRCSG |
|             | B | 310 | 143464.69 | 35175.50 | 96.06  | Geranyltranstransferase (IspA)          | Transferase            | Sulfate ion                                                 | SO4 | Protein | X-ray | 2011-01-12 NYSRCSG |
|             | C | 310 | 143464.69 | 35175.50 | 246.09 | Geranyltranstransferase (IspA)          | Transferase            | 3-methylbut-3-enyl trihydrogen diphosphate                  | IPE | Protein | X-ray | 2011-01-12 NYSRCSG |
|             | C | 310 | 143464.69 | 35175.50 | 24.31  | Geranyltranstransferase (IspA)          | Transferase            | Magnesium ion                                               | MG  | Protein | X-ray | 2011-01-12 NYSRCSG |
|             | C | 310 | 143464.69 | 35175.50 | 96.06  | Geranyltranstransferase (IspA)          | Transferase            | Sulfate ion                                                 | SO4 | Protein | X-ray | 2011-01-12 NYSRCSG |
|             | D | 310 | 143464.69 | 35175.50 | 246.09 | Geranyltranstransferase (IspA)          | Transferase            | 3-methylbut-3-enyl trihydrogen diphosphate                  | IPE | Protein | X-ray | 2011-01-12 NYSRCSG |
|             | D | 310 | 143464.69 | 35175.50 | 24.31  | Geranyltranstransferase (IspA)          | Transferase            | Magnesium ion                                               | MG  | Protein | X-ray | 2011-01-12 NYSRCSG |
| <b>3QBU</b> | A | 326 | 150530.31 | 37567.20 | 65.38  | PutativeProtein                         | Hydrolase              | Zinc ion                                                    | ZN  | Protein | X-ray | 2011-05-25         |
|             | B | 326 | 150530.31 | 37567.20 | 65.38  | PutativeProtein                         | Hydrolase              | Zinc ion                                                    | ZN  | Protein | X-ray | 2011-05-25         |
|             | C | 326 | 150530.31 | 37567.20 | 65.38  | PutativeProtein                         | Hydrolase              | Zinc ion                                                    | ZN  | Protein | X-ray | 2011-05-25         |
|             | D | 326 | 150530.31 | 37567.20 | 65.38  | PutativeProtein                         | Hydrolase              | Zinc ion                                                    | ZN  | Protein | X-ray | 2011-05-25         |
| <b>3QDL</b> | A | 210 | 98414.38  | 24101.20 | 456.35 | Oxygen-insensitive NADPH nitroreductase | Oxidoreductase         | Flavin mononucleotide                                       | FMN | Protein | X-ray | 2012-01-18         |
| <b>3QDL</b> | A | 210 | 98414.38  | 24101.20 | 92.09  | Oxygen-insensitive NADPH nitroreductase | Oxidoreductase         | Glycerol                                                    | GOL | Protein | X-ray | 2012-01-18         |
|             | B | 210 | 98414.38  | 24101.20 | 456.35 | Oxygen-insensitive NADPH                | Oxidoreductase         | Flavin mononucleotide                                       | FMN | Protein | X-ray | 2012-01-18         |

|             |   |     |          |          |                |                          |                |                                             |     |         |       |                 |
|-------------|---|-----|----------|----------|----------------|--------------------------|----------------|---------------------------------------------|-----|---------|-------|-----------------|
|             |   |     |          |          | nitroreductase |                          |                |                                             |     |         |       |                 |
|             | C | 210 | 98414.38 | 24101.20 | 456.35         | Oxygen-insensitive NADPH | Oxidoreductase | Flavin mononucleotide                       | FMN | Protein | X-ray | 2012-01-18      |
|             |   |     |          |          | nitroreductase |                          |                |                                             |     |         |       |                 |
|             | D | 210 | 98414.38 | 24101.20 | 456.35         | Oxygen-insensitive NADPH | Oxidoreductase | Flavin mononucleotide                       | FMN | Protein | X-ray | 2012-01-18      |
|             |   |     |          |          | nitroreductase |                          |                |                                             |     |         |       |                 |
|             | D | 210 | 98414.38 | 24101.20 | 92.09          | Oxygen-insensitive NADPH | Oxidoreductase | Glycerol                                    | GOL | Protein | X-ray | 2012-01-18      |
|             |   |     |          |          | nitroreductase |                          |                |                                             |     |         |       |                 |
| <b>3QHP</b> | A | 166 | 37157.20 | 18578.60 |                | TypeProtein J (CapJ)     | Transferase    |                                             |     | Protein | X-ray | 2011-06-29      |
|             | B | 166 | 37157.20 | 18578.60 |                | TypeProtein J (CapJ)     | Transferase    |                                             |     | Protein | X-ray | 2011-06-29      |
| <b>3QXC</b> | A | 242 | 28684.82 | 27148.30 | 507.18         | Dethiobiotin synthetase  | Ligase         | Adenosine-5'-triphosphate                   | ATP | Protein | X-ray | 2011-03-30 MCSG |
|             | A | 242 | 28684.82 | 27148.30 | 62.07          | Dethiobiotin synthetase  | Ligase         | 1,2-ethanediol                              | EDO | Protein | X-ray | 2011-03-30 MCSG |
|             | A | 242 | 28684.82 | 27148.30 | 92.09          | Dethiobiotin synthetase  | Ligase         | Glycerol                                    | GOL | Protein | X-ray | 2011-03-30 MCSG |
|             | A | 242 | 28684.82 | 27148.30 | 24.31          | Dethiobiotin synthetase  | Ligase         | Magnesium ion                               | MG  | Protein | X-ray | 2011-03-30 MCSG |
|             | A | 242 | 28684.82 | 27148.30 | 62.01          | Dethiobiotin synthetase  | Ligase         | Nitrate ion                                 | NO3 | Protein | X-ray | 2011-03-30 MCSG |
|             | A | 242 | 28684.82 | 27148.30 | 106.12         | Dethiobiotin synthetase  | Ligase         | Di(hydroxyethyl)ether                       | PEG | Protein | X-ray | 2011-03-30 MCSG |
| <b>3QXH</b> | A | 242 | 28188.65 | 27148.30 | 159.23         | Dethiobiotin synthetase  | Ligase         | 8-aminooctanoic acid                        | 8AC | Protein | X-ray | 2011-03-30 MCSG |
|             | A | 242 | 28188.65 | 27148.30 | 427.20         | Dethiobiotin synthetase  | Ligase         | Adenosine-5'-diphosphate                    | ADP | Protein | X-ray | 2011-03-30 MCSG |
|             | A | 242 | 28188.65 | 27148.30 | 62.07          | Dethiobiotin synthetase  | Ligase         | 1,2-ethanediol                              | EDO | Protein | X-ray | 2011-03-30 MCSG |
|             | A | 242 | 28188.65 | 27148.30 | 24.31          | Dethiobiotin synthetase  | Ligase         | Magnesium ion                               | MG  | Protein | X-ray | 2011-03-30 MCSG |
|             | A | 242 | 28188.65 | 27148.30 | 94.97          | Dethiobiotin synthetase  | Ligase         | Phosphate ion                               | PO4 | Protein | X-ray | 2011-03-30 MCSG |
| <b>3QXJ</b> | A | 242 | 28316.41 | 27148.30 | 62.07          | Dethiobiotin synthetase  | Ligase         | 1,2-ethanediol                              | EDO | Protein | X-ray | 2011-03-30 MCSG |
|             | A | 242 | 28316.41 | 27148.30 | 523.18         | Dethiobiotin synthetase  | Ligase         | Guanosine-5'-triphosphate                   | GTP | Protein | X-ray | 2011-03-30 MCSG |
|             | A | 242 | 28316.41 | 27148.30 | 24.31          | Dethiobiotin synthetase  | Ligase         | Magnesium ion                               | MG  | Protein | X-ray | 2011-03-30 MCSG |
|             | A | 242 | 28316.41 | 27148.30 | 62.01          | Dethiobiotin synthetase  | Ligase         | Nitrate ion                                 | NO3 | Protein | X-ray | 2011-03-30 MCSG |
| <b>3QXS</b> | A | 242 | 28423.56 | 27148.30 | 506.20         | Dethiobiotin synthetase  | Ligase         | Phosphoaminophosphonic acid-adenylate ester | ANP | Protein | X-ray | 2011-03-30 MCSG |
|             | A | 242 | 28423.56 | 27148.30 | 62.07          | Dethiobiotin synthetase  | Ligase         | 1,2-ethanediol                              | EDO | Protein | X-ray | 2011-03-30 MCSG |
|             | A | 242 | 28423.56 | 27148.30 | 24.31          | Dethiobiotin synthetase  | Ligase         | Magnesium ion                               | MG  | Protein | X-ray | 2011-03-30 MCSG |
|             | A | 242 | 28423.56 | 27148.30 | 62.01          | Dethiobiotin synthetase  | Ligase         | Nitrate ion                                 | NO3 | Protein | X-ray | 2011-03-30 MCSG |
| <b>3QXX</b> | A | 242 | 28358.81 | 27148.30 | 159.23         | Dethiobiotin synthetase  | Ligase         | 8-aminooctanoic acid                        | 8AC | Protein | X-ray | 2011-03-30 MCSG |
|             | A | 242 | 28358.81 | 27148.30 | 62.07          | Dethiobiotin synthetase  | Ligase         | 1,2-ethanediol                              | EDO | Protein | X-ray | 2011-03-30 MCSG |

|             |   |     |          |          |        |                                                          |             |                          |     |         |       |            |      |
|-------------|---|-----|----------|----------|--------|----------------------------------------------------------|-------------|--------------------------|-----|---------|-------|------------|------|
|             | A | 242 | 28358.81 | 27148.30 | 443.20 | Dethiobiotin synthetase                                  | Ligase      | Guanosine-5'-diphosphate | GDP | Protein | X-ray | 2011-03-30 | MCSG |
|             | A | 242 | 28358.81 | 27148.30 | 92.09  | Dethiobiotin synthetase                                  | Ligase      | Glycerol                 | GOL | Protein | X-ray | 2011-03-30 | MCSG |
|             | A | 242 | 28358.81 | 27148.30 | 24.31  | Dethiobiotin synthetase                                  | Ligase      | Magnesium ion            | MG  | Protein | X-ray | 2011-03-30 | MCSG |
|             | A | 242 | 28358.81 | 27148.30 | 94.97  | Dethiobiotin synthetase                                  | Ligase      | Phosphate ion            | PO4 | Protein | X-ray | 2011-03-30 | MCSG |
| <b>3QY0</b> | A | 242 | 28728.17 | 27148.30 | 62.07  | Dethiobiotin synthetase                                  | Ligase      | 1,2-ethanediol           | EDO | Protein | X-ray | 2011-03-30 | MCSG |
|             | A | 242 | 28728.17 | 27148.30 | 443.20 | Dethiobiotin synthetase                                  | Ligase      | Guanosine-5'-diphosphate | GDP | Protein | X-ray | 2011-03-30 | MCSG |
|             | A | 242 | 28728.17 | 27148.30 | 24.31  | Dethiobiotin synthetase                                  | Ligase      | Magnesium ion            | MG  | Protein | X-ray | 2011-03-30 | MCSG |
|             | A | 242 | 28728.17 | 27148.30 | 94.97  | Dethiobiotin synthetase                                  | Ligase      | Phosphate ion            | PO4 | Protein | X-ray | 2011-03-30 | MCSG |
| <b>3RPF</b> | A | 148 | 51184.51 | 16988.50 | 62.07  | Molybdopterin synthase catalytic subunit                 | Transferase | 1,2-ethanediol           | EDO | Protein | X-ray | 2011-06-29 | MCSG |
|             | A | 148 | 51184.51 | 16988.50 | 196.11 | Molybdopterin synthase catalytic subunit                 | Transferase | Selenomethionine         | MSE | Protein | X-ray | 2011-06-29 | MCSG |
|             | A | 148 | 51184.51 | 16988.50 | 96.06  | Molybdopterin synthase catalytic subunit                 | Transferase | Sulfate ion              | SO4 | Protein | X-ray | 2011-06-29 | MCSG |
|             | B | 148 | 51184.51 | 16988.50 | 62.07  | Molybdopterin synthase catalytic subunit                 | Transferase | 1,2-ethanediol           | EDO | Protein | X-ray | 2011-06-29 | MCSG |
|             | B | 148 | 51184.51 | 16988.50 | 196.11 | Molybdopterin synthase catalytic subunit                 | Transferase | Selenomethionine         | MSE | Protein | X-ray | 2011-06-29 | MCSG |
|             | B | 148 | 51184.51 | 16988.50 | 96.06  | Molybdopterin synthase catalytic subunit                 | Transferase | Sulfate ion              | SO4 | Protein | X-ray | 2011-06-29 | MCSG |
|             | C | 74  | 51184.51 | 8383.56  | 196.11 | Molybdopterin converting factor, subunit 1 (MoaD)        | Transferase | Selenomethionine         | MSE | Protein | X-ray | 2011-06-29 | MCSG |
|             | D | 74  | 51184.51 | 8383.56  | 196.11 | Molybdopterin converting factor, subunit 1 (MoaD)        | Transferase | Selenomethionine         | MSE | Protein | X-ray | 2011-06-29 | MCSG |
| <b>3RRL</b> | A | 235 | 97219.09 | 25806.50 | 196.11 | Succinyl-CoA:3-ketoacid-coenzyme A transferase subunit A | Transferase | Selenomethionine         | MSE | Protein | X-ray | 2011-06-29 | MCSG |
|             | B | 207 | 97219.09 | 22757.00 | 196.11 | Succinyl-CoA:3-ketoacid-coenzyme A transferase subunit B | Transferase | Selenomethionine         | MSE | Protein | X-ray | 2011-06-29 | MCSG |
|             | C | 235 | 97219.09 | 25806.50 | 92.09  | Succinyl-CoA:3-ketoacid-coenzyme A transferase subunit A | Transferase | Glycerol                 | GOL | Protein | X-ray | 2011-06-29 | MCSG |
|             | C | 235 | 97219.09 | 25806.50 | 196.11 | Succinyl-CoA:3-ketoacid-coenzyme A                       | Transferase | Selenomethionine         | MSE | Protein | X-ray | 2011-06-29 | MCSG |

|                       |   |     |           |          |        |                                          |                 |                                   |     |         |       |            |      |
|-----------------------|---|-----|-----------|----------|--------|------------------------------------------|-----------------|-----------------------------------|-----|---------|-------|------------|------|
| transferase subunit A |   |     |           |          |        |                                          |                 |                                   |     |         |       |            |      |
|                       | D | 207 | 97219.09  | 22757.00 | 196.11 | Succinyl-CoA:3-ketoacid-coenzyme A       | Transferase     | Selenomethionine                  | MSE | Protein | X-ray | 2011-06-29 | MCSG |
| transferase subunit B |   |     |           |          |        |                                          |                 |                                   |     |         |       |            |      |
| <b>3SF5</b>           | A | 254 | 118438.17 | 28652.00 | 92.09  | UreaseProtein ureF                       | Chaperone       | Glycerol                          | GOL | Protein | X-ray | 2011-11-02 |      |
|                       | A | 254 | 118438.17 | 28652.00 | 106.12 | UreaseProtein ureF                       | Chaperone       | Di(hydroxyethyl)ether             | PEG | Protein | X-ray | 2011-11-02 |      |
|                       | B | 265 | 118438.17 | 29757.30 | 106.12 | UreaseProtein ureH                       | Chaperone       | Di(hydroxyethyl)ether             | PEG | Protein | X-ray | 2011-11-02 |      |
|                       | B | 265 | 118438.17 | 29757.30 | 96.06  | UreaseProtein ureH                       | Chaperone       | Sulfate ion                       | SO4 | Protein | X-ray | 2011-11-02 |      |
|                       | C | 254 | 118438.17 | 28652.00 | 92.09  | UreaseProtein ureF                       | Chaperone       | Glycerol                          | GOL | Protein | X-ray | 2011-11-02 |      |
|                       | C | 254 | 118438.17 | 28652.00 | 106.12 | UreaseProtein ureF                       | Chaperone       | Di(hydroxyethyl)ether             | PEG | Protein | X-ray | 2011-11-02 |      |
|                       | C | 254 | 118438.17 | 28652.00 | 96.06  | UreaseProtein ureF                       | Chaperone       | Sulfate ion                       | SO4 | Protein | X-ray | 2011-11-02 |      |
|                       | D | 265 | 118438.17 | 29757.30 | 106.12 | UreaseProtein ureH                       | Chaperone       | Di(hydroxyethyl)ether             | PEG | Protein | X-ray | 2011-11-02 |      |
|                       | D | 265 | 118438.17 | 29757.30 | 96.06  | UreaseProtein ureH                       | Chaperone       | Sulfate ion                       | SO4 | Protein | X-ray | 2011-11-02 |      |
| <b>3SXP</b>           | A | 362 | 209058.16 | 41148.20 | 663.43 | ADP-L-glycero-D-mannoheptose-6-epimerase | Isomerase       | Nicotinamide-adenine-dinucleotide | NAD | Protein | X-ray | 2012-02-08 |      |
|                       | B | 362 | 209058.16 | 41148.20 | 663.43 | ADP-L-glycero-D-mannoheptose-6-epimerase | Isomerase       | Nicotinamide-adenine-dinucleotide | NAD | Protein | X-ray | 2012-02-08 |      |
|                       | C | 362 | 209058.16 | 41148.20 | 663.43 | ADP-L-glycero-D-mannoheptose-6-epimerase | Isomerase       | Nicotinamide-adenine-dinucleotide | NAD | Protein | X-ray | 2012-02-08 |      |
|                       | D | 362 | 209058.16 | 41148.20 | 663.43 | ADP-L-glycero-D-mannoheptose-6-epimerase | Isomerase       | Nicotinamide-adenine-dinucleotide | NAD | Protein | X-ray | 2012-02-08 |      |
|                       | E | 362 | 209058.16 | 41148.20 | 663.43 | ADP-L-glycero-D-mannoheptose-6-epimerase | Isomerase       | Nicotinamide-adenine-dinucleotide | NAD | Protein | X-ray | 2012-02-08 |      |
| <b>3T9J</b>           | A | 164 | 19068.87  | 19006.80 | 62.07  | Neutrophil-activating protein            | Metal transport | 1,2-ethanediol                    | EDO | Protein | X-ray | 2012-02-08 |      |
| <b>3TA8</b>           | A | 164 | 19366.77  | 19006.80 | 62.07  | Neutrophil-activating protein            | Metal transport | 1,2-ethanediol                    | EDO | Protein | X-ray | 2012-02-08 |      |
|                       | A | 164 | 19366.77  | 19006.80 | 55.85  | Neutrophil-activating protein            | Metal transport | Fe (III) ion                      | FE  | Protein | X-ray | 2012-02-08 |      |
| <b>3TC1</b>           | A | 315 | 72308.81  | 36130.10 | 24.31  | Octaprenyl Pyrophosphate Synthase        | Transferase     | Magnesium ion                     | MG  | Protein | X-ray | 2011-08-31 |      |
|                       | B | 315 | 72308.81  | 36130.10 | 24.31  | Octaprenyl Pyrophosphate Synthase        | Transferase     | Magnesium ion                     | MG  | Protein | X-ray | 2011-08-31 |      |
| <b>3TDG</b>           | A | 273 | 30991.95  | 30571.50 | 46.03  | PutativeProtein                          | Oxidoreductase  | Formic acid                       | FMT | Protein | X-ray | 2011-11-09 |      |
|                       | A | 273 | 30991.95  | 30571.50 | 92.09  | PutativeProtein                          | Oxidoreductase  | Glycerol                          | GOL | Protein | X-ray | 2011-11-09 |      |
|                       | A | 273 | 30991.95  | 30571.50 | 282.33 | PutativeProtein                          | Oxidoreductase  | Hexaethylene glycol               | P6G | Protein | X-ray | 2011-11-09 |      |
| <b>3TJ8</b>           | A | 170 | 39394.36  | 19437.70 | 46.03  | UreaseProtein ureE                       | metalProtein    | Formic acid                       | FMT | Protein | X-ray | 2011-11-02 |      |

|             |   |     |          |          |        |                                |                |                                                           |     |         |       |            |
|-------------|---|-----|----------|----------|--------|--------------------------------|----------------|-----------------------------------------------------------|-----|---------|-------|------------|
| <b>3TJ9</b> | B | 170 | 39394.36 | 19437.70 | 46.03  | UreaseProtein ureE             | metalProtein   | Formic acid                                               | FMT | Protein | X-ray | 2011-11-02 |
|             | B | 170 | 39394.36 | 19437.70 | 58.70  | UreaseProtein ureE             | metalProtein   | Nickel (ii) ion                                           | NI  | Protein | X-ray | 2011-11-02 |
|             | A | 170 | 77927.58 | 19437.70 | 46.03  | UreaseProtein ureE             | metalProtein   | Formic acid                                               | FMT | Protein | X-ray | 2011-11-02 |
|             | A | 170 | 77927.58 | 19437.70 | 65.38  | UreaseProtein ureE             | metalProtein   | Zinc ion                                                  | ZN  | Protein | X-ray | 2011-11-02 |
|             | B | 170 | 77927.58 | 19437.70 |        | UreaseProtein ureE             | metalProtein   |                                                           |     | Protein | X-ray | 2011-11-02 |
|             | C | 170 | 77927.58 | 19437.70 | 65.38  | UreaseProtein ureE             | metalProtein   | Zinc ion                                                  | ZN  | Protein | X-ray | 2011-11-02 |
| <b>3TJA</b> | D | 170 | 77927.58 | 19437.70 |        | UreaseProtein ureE             | metalProtein   |                                                           |     | Protein | X-ray | 2011-11-02 |
|             | A | 170 | 78170.48 | 19437.70 | 35.45  | UreaseProtein ureE             | metalProtein   | Chloride ion                                              | CL  | Protein | X-ray | 2011-11-02 |
|             | A | 170 | 78170.48 | 19437.70 | 96.06  | UreaseProtein ureE             | metalProtein   | Sulfate ion                                               | SO4 | Protein | X-ray | 2011-11-02 |
|             | B | 170 | 78170.48 | 19437.70 | 96.06  | UreaseProtein ureE             | metalProtein   | Sulfate ion                                               | SO4 | Protein | X-ray | 2011-11-02 |
|             | C | 170 | 78170.48 | 19437.70 | 96.06  | UreaseProtein ureE             | metalProtein   | Sulfate ion                                               | SO4 | Protein | X-ray | 2011-11-02 |
|             | D | 170 | 78170.48 | 19437.70 | 96.06  | UreaseProtein ureE             | Metalprotein   | Sulfate ion                                               | SO4 | Protein | X-ray | 2011-11-02 |
| <b>3TWO</b> | A | 348 | 79226.37 | 38737.00 | 745.43 | Mannitol dehydrogenase         | Oxidoreductase | Nadph dihydro-nicotinamide-adenine-dinucleotide phosphate | NDP | Protein | X-ray | 2011-10-12 |
|             | A | 348 | 79226.37 | 38737.00 | 65.38  | Mannitol dehydrogenase         | Oxidoreductase | Zinc ion                                                  | ZN  | Protein | X-ray | 2011-10-12 |
|             | B | 348 | 79226.37 | 38737.00 | 745.43 | Mannitol dehydrogenase         | Oxidoreductase | Nadph dihydro-nicotinamide-adenine-dinucleotide phosphate | NDP | Protein | X-ray | 2011-10-12 |
|             | B | 348 | 79226.37 | 38737.00 | 65.38  | Mannitol dehydrogenase         | Oxidoreductase | Zinc ion                                                  | ZN  | Protein | X-ray | 2011-10-12 |
|             | A | 160 | 37445.60 | 18722.80 | 196.11 | ImmunoglobulinProteinProtein D | Rnaprotein     | Selenomethionine                                          | MSE | Protein | X-ray | 2012-02-08 |
|             | B | 160 | 37445.60 | 18722.80 | 196.11 | ImmunoglobulinProteinProtein D | Rnaprotein     | Selenomethionine                                          | MSE | Protein | X-ray | 2012-02-08 |
| <b>3USW</b> | A | 258 | 29018.70 | 29018.70 |        | FlagellarProtein               | Motor protein  |                                                           |     | Protein | X-ray | 2011-12-14 |
| <b>3USY</b> | A | 234 | 52240.80 | 26120.40 |        | FlagellarProtein               | Motor protein  |                                                           |     | Protein | X-ray | 2011-12-14 |
|             | B | 234 | 52240.80 | 26120.40 |        | FlagellarProtein               | Motor protein  |                                                           |     | Protein | X-ray | 2011-12-14 |

<sup>a</sup> Midwest Center for SG; <sup>b</sup> Structural Genomics; <sup>c</sup> Northeast SG Consortium; <sup>d</sup> Montreal-Kingston Bacterial Structural Genomics Initiative; <sup>e</sup> New York SGX Research Center for SG; <sup>f</sup> Ontario Centre for Structural Proteomics; <sup>g</sup> Joint Center for SG.
